# Supplementary material for: On the Origin and Spread of the Scab Disease of Apple: Out of Central Asia
Source: PubMed Central journal article supplement (PMC2186383; doi:10.1371/journal.pone.0001455), 2008-01-16
Supplement: pone.0001455.s001.pdf [file pone.0001455.s001.pdf]

Table S1. Pairwise  $\phi_{ST}$  between pairs of samples of *Venturia inaequalis* collected on different cultivars in the same location.

|     | BR3                 | BR6     | CN1                 | CN2                 | CN5                 | CN6                 | F3                  | F4                  | F7                  | MA1                 | MA3                 | MA4      | SP1                 | SP2    | US1 |                     |
|-----|---------------------|---------|---------------------|---------------------|---------------------|---------------------|---------------------|---------------------|---------------------|---------------------|---------------------|----------|---------------------|--------|-----|---------------------|
| BR4 | 0.006 <sup>ns</sup> |         |                     |                     |                     |                     |                     |                     |                     |                     |                     |          |                     |        |     |                     |
| BR7 |                     | 0.039** |                     |                     |                     |                     |                     |                     |                     |                     |                     |          |                     |        |     |                     |
| CN2 |                     |         | 0.012 <sup>ns</sup> |                     |                     |                     |                     |                     |                     |                     |                     |          |                     |        |     |                     |
| CN3 |                     |         | 0.005 <sup>ns</sup> | 0.000 <sup>ns</sup> |                     |                     |                     |                     |                     |                     |                     |          |                     |        |     |                     |
| CN6 |                     |         |                     |                     | 0.002 <sup>ns</sup> |                     |                     |                     |                     |                     |                     |          |                     |        |     |                     |
| CN7 |                     |         |                     |                     | 0.004 <sup>ns</sup> | 0.004 <sup>ns</sup> |                     |                     |                     |                     |                     |          |                     |        |     |                     |
| F6  |                     |         |                     |                     |                     |                     | 0.008 <sup>ns</sup> |                     |                     |                     |                     |          |                     |        |     |                     |
| F5  |                     |         |                     |                     |                     |                     |                     | 0.012 <sup>ns</sup> |                     |                     |                     |          |                     |        |     |                     |
| F8  |                     |         |                     |                     |                     |                     |                     |                     | 0.009 <sup>ns</sup> |                     |                     |          |                     |        |     |                     |
| MA2 |                     |         |                     |                     |                     |                     |                     |                     |                     | 0.000 <sup>ns</sup> |                     |          |                     |        |     |                     |
| MA4 |                     |         |                     |                     |                     |                     |                     |                     |                     |                     | 0.000 <sup>ns</sup> |          |                     |        |     |                     |
| MA5 |                     |         |                     |                     |                     |                     |                     |                     |                     |                     | 0.070***            | 0.086*** |                     |        |     |                     |
| SP2 |                     |         |                     |                     |                     |                     |                     |                     |                     |                     |                     |          | 0.023*              |        |     |                     |
| SP3 |                     |         |                     |                     |                     |                     |                     |                     |                     |                     |                     |          | 0.016 <sup>ns</sup> | 0.016* |     |                     |
| US2 |                     |         |                     |                     |                     |                     |                     |                     |                     |                     |                     |          |                     |        |     | 0.000 <sup>ns</sup> |

The null hypothesis  $\phi_{ST} = 0$  was tested using 1000 random permutations [50]. <sup>ns</sup> $P > 0.05$ , \* $P < 0.05$ , \*\* $P < 0.01$ , \*\*\* $P < 0.001$ .
