# Supplementary material for: On the Origin and Spread of the Scab Disease of Apple: Out of Central Asia
Source: PubMed Central journal article supplement (PMC2186383; doi:10.1371/journal.pone.0001455), 2008-01-16
Supplement: pone.0001455.s002.pdf [file pone.0001455.s002.pdf]

Table S2. Origin and MLMT profiles for 1273 isolates of *Venturia inaequalis*

| isolate     | sample | host species      | host cultivar    | country | loci  |       |       |        |         |           |           |           |            |     |           |         |
|-------------|--------|-------------------|------------------|---------|-------|-------|-------|--------|---------|-----------|-----------|-----------|------------|-----|-----------|---------|
|             |        |                   |                  |         | 1tc1a | 1tc1b | 1tc1g | 1aac3b | Vitc1/2 | /ica9/152 | Vitcca7/P | Vitg11/70 | /icacg8/42 | M42 | Viga7/116 | Vica9/X |
| CN05KB1GO1  | CN1    | Malus x domestica | Golden Delicious | China   | 17    | 15    | 15    | 2      | 7       | 7         | 10        | 5         | 5          | 9   | 4         | 8       |
| CN05KB1GO10 | CN1    | Malus x domestica | Golden Delicious | China   | 10    | 15    | 11    | 2      | 5       | 6         | 9         | 5         | 5          | 9   | 4         | 7       |
| CN05KB1GO11 | CN1    | Malus x domestica | Golden Delicious | China   | 12    | 9     | 8     | 4      | 5       | 7         | 13        | 8         | 5          | 9   | 4         | 7       |
| CN05KB1GO12 | CN1    | Malus x domestica | Golden Delicious | China   | 13    | 21    | 14    | 2      | 7       | 7         | 16        | 11        | 12         | 10  | 4         | 8       |
| CN05KB1GO13 | CN1    | Malus x domestica | Golden Delicious | China   | 11    | 21    | 8     | 2      | 5       | 7         | ?         | 5         | 5          | 8   | 5         | 7       |
| CN05KB1GO14 | CN1    | Malus x domestica | Golden Delicious | China   | 11    | 2     | 9     | 2      | 6       | 6         | 13        | 11        | 8          | 20  | 6         | 8       |
| CN05KB1GO15 | CN1    | Malus x domestica | Golden Delicious | China   | 11    | 15    | 6     | 3      | 7       | 7         | 10        | 10        | 5          | 9   | 6         | 9       |
| CN05KB1GO18 | CN1    | Malus x domestica | Golden Delicious | China   | ?     | 15    | 6     | 2      | 7       | 7         | 16        | 9         | 5          | 9   | 4         | 9       |
| CN05KB1GO19 | CN1    | Malus x domestica | Golden Delicious | China   | 4     | 9     | ?     | 5      | 6       | 7         | 9         | 8         | 14         | 14  | 5         | 7       |
| CN05KB1GO2  | CN1    | Malus x domestica | Golden Delicious | China   | 12    | 9     | 7     | 2      | 13      | 7         | 7         | 14        | 8          | 9   | 4         | 7       |
| CN05KB1GO20 | CN1    | Malus x domestica | Golden Delicious | China   | 5     | 9     | 11    | 3      | 6       | 6         | 6         | 7         | 5          | 9   | 4         | 8       |
| CN05KB1GO21 | CN1    | Malus x domestica | Golden Delicious | China   | 12    | 9     | 17    | 2      | 6       | 7         | 12        | 9         | 2          | 11  | 4         | 9       |
| CN05KB1GO22 | CN1    | Malus x domestica | Golden Delicious | China   | 11    | 9     | 16    | 2      | 11      | 5         | 6         | 8         | 5          | 9   | 4         | 12      |
| CN05KB1GO23 | CN1    | Malus x domestica | Golden Delicious | China   | 9     | 9     | 14    | 2      | 7       | 7         | 7         | 8         | 11         | 9   | 4         | 9       |
| CN05KB1GO24 | CN1    | Malus x domestica | Golden Delicious | China   | 12    | 2     | 11    | 2      | 5       | 6         | 16        | 9         | 12         | ?   | 4         | 7       |
| CN05KB1GO25 | CN1    | Malus x domestica | Golden Delicious | China   | 22    | 10    | ?     | 2      | 5       | 6         | ?         | 8         | 5          | 13  | 5         | 9       |
| CN05KB1GO26 | CN1    | Malus x domestica | Golden Delicious | China   | 7     | 9     | ?     | 2      | 9       | 7         | 10        | 5         | 11         | 12  | 5         | 8       |
| CN05KB1GO27 | CN1    | Malus x domestica | Golden Delicious | China   | 12    | 9     | 13    | 3      | 7       | 7         | ?         | 8         | 5          | 9   | 6         | 7       |
| CN05KB1GO28 | CN1    | Malus x domestica | Golden Delicious | China   | 12    | 9     | 7     | 3      | 11      | 6         | 9         | 7         | 5          | 9   | 6         | 7       |
| CN05KB1GO29 | CN1    | Malus x domestica | Golden Delicious | China   | 13    | 9     | 17    | 2      | 4       | 7         | 16        | 7         | 5          | 9   | 6         | 7       |
| CN05KB1GO3  | CN1    | Malus x domestica | Golden Delicious | China   | 10    | 2     | 3     | 2      | 5       | 6         | 16        | 5         | 5          | 11  | 5         | 7       |
| CN05KB1GO30 | CN1    | Malus x domestica | Golden Delicious | China   | 6     | 8     | 8     | 2      | 4       | 6         | ?         | 6         | 5          | 9   | 6         | 7       |
| CN05KB1GO31 | CN1    | Malus x domestica | Golden Delicious | China   | 10    | 9     | 8     | 2      | 4       | 7         | 8         | 7         | 5          | 9   | 6         | 8       |
| CN05KB1GO5  | CN1    | Malus x domestica | Golden Delicious | China   | 10    | 9     | 4     | ?      | 7       | 8         | 9         | 10        | 5          | 9   | 4         | 7       |
| CN05KB1GO6  | CN1    | Malus x domestica | Golden Delicious | China   | ?     | 11    | 7     | 2      | 5       | 7         | 18        | 13        | 11         | 16  | 6         | 7       |
| CN05KB1GO7  | CN1    | Malus x domestica | Golden Delicious | China   | ?     | 11    | 11    | 2      | 7       | 7         | 8         | 2         | 5          | 16  | 4         | 8       |
| CN05KB1GO8  | CN1    | Malus x domestica | Golden Delicious | China   | 10    | 10    | 8     | 2      | 4       | 7         | 8         | 12        | 5          | 13  | 6         | 7       |
| CN05KB1GO9  | CN1    | Malus x domestica | Golden Delicious | China   | 14    | 2     | 11    | 2      | 4       | 6         | 10        | 6         | 5          | 9   | 6         | 9       |
| CN05KB2FU10 | CN2    | Malus x domestica | Fuji             | China   | 12    | 9     | 3     | 2      | 8       | 7         | 8         | 8         | 5          | 10  | 6         | 8       |
| CN05KB2FU11 | CN2    | Malus x domestica | Fuji             | China   | ?     | 15    | 5     | 2      | 17      | 7         | 8         | 5         | ?          | 9   | 4         | 8       |
| CN05KB2FU12 | CN2    | Malus x domestica | Fuji             | China   | 11    | 11    | 6     | 2      | 14      | 6         | 9         | 3         | 5          | 11  | 5         | 8       |
| CN05KB2FU13 | CN2    | Malus x domestica | Fuji             | China   | 15    | 9     | 17    | 2      | ?       | 7         | ?         | 18        | 8          | 10  | 4         | 7       |
| CN05KB2FU14 | CN2    | Malus x domestica | Fuji             | China   | 10    | 9     | 22    | 2      | 11      | 7         | 9         | 6         | 8          | 8   | 6         | 7       |
| CN05KB2FU15 | CN2    | Malus x domestica | Fuji             | China   | 22    | 9     | 3     | 2      | 5       | 7         | 8         | 5         | 14         | 8   | 5         | 7       |
| CN05KB2FU16 | CN2    | Malus x domestica | Fuji             | China   | 22    | 9     | 6     | 4      | 8       | 6         | 13        | 5         | 5          | 9   | 6         | 9       |
| CN05KB2FU17 | CN2    | Malus x domestica | Fuji             | China   | 12    | 9     | ?     | 2      | 7       | 7         | 9         | 10        | 12         | 9   | 5         | 8       |

|             |     |                   |            |       |    |    |    |   |    |   |    |    |    |    |   |    |
|-------------|-----|-------------------|------------|-------|----|----|----|---|----|---|----|----|----|----|---|----|
| CN05KB2FU18 | CN2 | Malus x domestica | Fuji       | China | 10 | 9  | 22 | 2 | 13 | 7 | 7  | 6  | 5  | 8  | 6 | 7  |
| CN05KB2FU19 | CN2 | Malus x domestica | Fuji       | China | ?  | 10 | 2  | 2 | 5  | 6 | 9  | ?  | 5  | 16 | 5 | 9  |
| CN05KB2FU2  | CN2 | Malus x domestica | Fuji       | China | 5  | 10 | ?  | 2 | 4  | 7 | 10 | 5  | 5  | 8  | 4 | 8  |
| CN05KB2FU20 | CN2 | Malus x domestica | Fuji       | China | 3  | 9  | 17 | 2 | 5  | 7 | 7  | 10 | 5  | 10 | 5 | 7  |
| CN05KB2FU21 | CN2 | Malus x domestica | Fuji       | China | 12 | 9  | 6  | 4 | 13 | 7 | 9  | 8  | 5  | 8  | 5 | 7  |
| CN05KB2FU22 | CN2 | Malus x domestica | Fuji       | China | 13 | 9  | 11 | 2 | 6  | 7 | 9  | 5  | 4  | 12 | 5 | 9  |
| CN05KB2FU23 | CN2 | Malus x domestica | Fuji       | China | 11 | 2  | 3  | 2 | 7  | 6 | 16 | 5  | 5  | 11 | 7 | 9  |
| CN05KB2FU24 | CN2 | Malus x domestica | Fuji       | China | 6  | 11 | 23 | 2 | ?  | 7 | 17 | 5  | 1  | 10 | 4 | 9  |
| CN05KB2FU25 | CN2 | Malus x domestica | Fuji       | China | 11 | 9  | 1  | 2 | 8  | 7 | 10 | 10 | 12 | 10 | 5 | 7  |
| CN05KB2FU26 | CN2 | Malus x domestica | Fuji       | China | 10 | 9  | 2  | 2 | 7  | 6 | 10 | 8  | 5  | 12 | 5 | 7  |
| CN05KB2FU27 | CN2 | Malus x domestica | Fuji       | China | 3  | 3  | 5  | 2 | 8  | 7 | 13 | 3  | 14 | 12 | 5 | 7  |
| CN05KB2FU28 | CN2 | Malus x domestica | Fuji       | China | 15 | 14 | ?  | 2 | 7  | 7 | 10 | 7  | 4  | 9  | 5 | 8  |
| CN05KB2FU29 | CN2 | Malus x domestica | Fuji       | China | ?  | 10 | ?  | ? | 7  | 1 | 10 | 6  | 5  | 9  | 4 | 7  |
| CN05KB2FU3  | CN2 | Malus x domestica | Fuji       | China | 9  | ?  | 26 | 2 | 5  | 7 | 9  | 8  | 5  | 8  | 4 | 7  |
| CN05KB2FU30 | CN2 | Malus x domestica | Fuji       | China | 10 | 9  | 11 | 2 | 4  | 7 | 9  | 5  | 5  | 13 | 6 | 7  |
| CN05KB2FU4  | CN2 | Malus x domestica | Fuji       | China | 10 | 9  | 11 | 2 | 7  | 7 | 6  | 7  | 5  | 11 | 5 | 9  |
| CN05KB2FU5  | CN2 | Malus x domestica | Fuji       | China | 3  | 15 | ?  | 2 | 13 | 6 | 8  | 8  | 5  | 9  | 5 | 8  |
| CN05KB2FU6  | CN2 | Malus x domestica | Fuji       | China | 18 | 9  | 11 | 2 | 5  | 7 | 11 | 10 | 5  | 16 | 4 | 8  |
| CN05KB2FU8  | CN2 | Malus x domestica | Fuji       | China | 10 | 9  | 22 | 2 | 11 | 7 | 7  | 6  | 8  | 8  | 6 | 7  |
| CN05KB2FU9  | CN2 | Malus x domestica | Fuji       | China | 13 | 10 | 2  | 2 | 5  | 6 | 10 | 6  | 5  | 9  | 6 | 8  |
| CN05KB3GA1  | CN3 | Malus x domestica | Royal Gala | China | 11 | 9  | 6  | 2 | 7  | 6 | 9  | 7  | 5  | 13 | 4 | 9  |
| CN05KB3GA10 | CN3 | Malus x domestica | Royal Gala | China | 15 | 9  | ?  | 3 | 6  | 7 | 9  | 10 | 5  | 15 | 5 | 8  |
| CN05KB3GA11 | CN3 | Malus x domestica | Royal Gala | China | 18 | 9  | ?  | 2 | ?  | 6 | 7  | 10 | 8  | 9  | 6 | 8  |
| CN05KB3GA12 | CN3 | Malus x domestica | Royal Gala | China | 10 | 9  | 21 | 5 | 4  | 7 | 12 | 8  | 5  | 10 | 9 | 7  |
| CN05KB3GA13 | CN3 | Malus x domestica | Royal Gala | China | 2  | 9  | 11 | 2 | 13 | 1 | 9  | 5  | 5  | 12 | 4 | 8  |
| CN05KB3GA14 | CN3 | Malus x domestica | Royal Gala | China | 5  | 9  | 17 | 5 | 13 | 9 | 9  | 10 | 15 | 13 | 4 | 9  |
| CN05KB3GA15 | CN3 | Malus x domestica | Royal Gala | China | 12 | 9  | 15 | 2 | 5  | 6 | 10 | 8  | 5  | 9  | 6 | 7  |
| CN05KB3GA16 | CN3 | Malus x domestica | Royal Gala | China | 17 | 9  | ?  | 2 | 3  | 7 | 10 | 5  | 5  | 11 | 6 | 7  |
| CN05KB3GA17 | CN3 | Malus x domestica | Royal Gala | China | 11 | 9  | 8  | 2 | 7  | 7 | 9  | 8  | 12 | 9  | 4 | 8  |
| CN05KB3GA18 | CN3 | Malus x domestica | Royal Gala | China | 17 | 9  | 17 | 2 | 12 | 7 | 7  | 5  | 8  | 11 | 5 | 7  |
| CN05KB3GA19 | CN3 | Malus x domestica | Royal Gala | China | 3  | 9  | 15 | 2 | 4  | 7 | 10 | 5  | 5  | 10 | 6 | 7  |
| CN05KB3GA2  | CN3 | Malus x domestica | Royal Gala | China | 19 | 15 | 17 | 2 | 17 | 6 | 7  | 5  | 5  | 9  | 6 | 9  |
| CN05KB3GA20 | CN3 | Malus x domestica | Royal Gala | China | 3  | ?  | 20 | 5 | 7  | 7 | 9  | 8  | 5  | 11 | 5 | 8  |
| CN05KB3GA21 | CN3 | Malus x domestica | Royal Gala | China | 11 | ?  | 6  | 2 | 7  | 6 | ?  | 7  | 5  | 13 | 4 | 9  |
| CN05KB3GA22 | CN3 | Malus x domestica | Royal Gala | China | 3  | 9  | ?  | 2 | 6  | 7 | 4  | 7  | 8  | 10 | 4 | 9  |
| CN05KB3GA23 | CN3 | Malus x domestica | Royal Gala | China | 13 | 15 | ?  | 2 | 8  | 7 | 7  | ?  | 5  | 9  | 6 | 8  |
| CN05KB3GA24 | CN3 | Malus x domestica | Royal Gala | China | 13 | 15 | 17 | 2 | 12 | 7 | 10 | 6  | 5  | 9  | 5 | 7  |
| CN05KB3GA25 | CN3 | Malus x domestica | Royal Gala | China | 15 | 9  | 8  | 2 | 7  | 7 | 7  | 5  | ?  | 13 | 4 | 12 |
| CN05KB3GA26 | CN3 | Malus x domestica | Royal Gala | China | 3  | 6  | ?  | 2 | 2  | 9 | 9  | 8  | 5  | 9  | 5 | 7  |
| CN05KB3GA27 | CN3 | Malus x domestica | Royal Gala | China | 10 | 9  | 8  | 2 | 7  | 6 | ?  | 8  | 5  | 11 | 5 | 8  |
| CN05KB3GA28 | CN3 | Malus x domestica | Royal Gala | China | 19 | 15 | 17 | 2 | 7  | 6 | 10 | 8  | 5  | 9  | 6 | 9  |

|              |     |                   |            |       |    |    |    |   |    |   |    |    |    |    |   |   |
|--------------|-----|-------------------|------------|-------|----|----|----|---|----|---|----|----|----|----|---|---|
| CN05KB3GA29  | CN3 | Malus x domestica | Royal Gala | China | 17 | 9  | 2  | 2 | 11 | 7 | 9  | 9  | 11 | 10 | 4 | 8 |
| CN05KB3GA3   | CN3 | Malus x domestica | Royal Gala | China | 11 | 9  | 6  | 2 | 7  | 6 | ?  | 7  | 5  | 13 | 4 | 9 |
| CN05KB3GA30  | CN3 | Malus x domestica | Royal Gala | China | 17 | 15 | ?  | 2 | 6  | 6 | 9  | 13 | 5  | 6  | 5 | 7 |
| CN05KB3GA31  | CN3 | Malus x domestica | Royal Gala | China | 18 | 14 | 14 | 2 | ?  | 7 | ?  | 8  | 7  | 10 | 7 | 7 |
| CN05KB3GA32  | CN3 | Malus x domestica | Royal Gala | China | 7  | 9  | 14 | 2 | 8  | 7 | 10 | 6  | 12 | 3  | 6 | 7 |
| CN05KB3GA33  | CN3 | Malus x domestica | Royal Gala | China | 13 | 15 | 11 | 2 | 5  | 7 | 9  | 7  | 12 | 12 | 4 | 9 |
| CN05KB3GA34  | CN3 | Malus x domestica | Royal Gala | China | 13 | 9  | ?  | 2 | 7  | 6 | 9  | 8  | 8  | 10 | 5 | 7 |
| CN05KB3GA35  | CN3 | Malus x domestica | Royal Gala | China | 11 | 9  | 11 | 2 | 5  | 6 | 11 | 6  | 5  | 8  | 4 | 8 |
| CN05KB3GA36  | CN3 | Malus x domestica | Royal Gala | China | 10 | 9  | 11 | 2 | 4  | 7 | 9  | 8  | 14 | 16 | 5 | 8 |
| CN05KB3GA37  | CN3 | Malus x domestica | Royal Gala | China | 9  | 9  | 8  | 2 | 7  | 6 | 7  | 6  | 5  | 9  | 5 | 8 |
| CN05KB3GA38  | CN3 | Malus x domestica | Royal Gala | China | 10 | 9  | 8  | 3 | 7  | 7 | 13 | 5  | 5  | 9  | 4 | 8 |
| CN05KB3GA39  | CN3 | Malus x domestica | Royal Gala | China | 3  | 15 | 8  | 2 | ?  | 7 | 8  | 7  | 5  | 9  | 4 | 8 |
| CN05KB3GA4   | CN3 | Malus x domestica | Royal Gala | China | 11 | 9  | 6  | 2 | 7  | 6 | ?  | 7  | 5  | 13 | 4 | 9 |
| CN05KB3GA40  | CN3 | Malus x domestica | Royal Gala | China | 3  | 15 | 6  | 2 | 2  | 2 | 10 | 8  | 5  | 9  | 5 | 7 |
| CN05KB3GA41  | CN3 | Malus x domestica | Royal Gala | China | 17 | 10 | 4  | 2 | 5  | 7 | 11 | 5  | 12 | 3  | 6 | 8 |
| CN05KB3GA42  | CN3 | Malus x domestica | Royal Gala | China | 16 | 2  | ?  | 2 | ?  | 7 | 9  | 5  | 8  | 10 | 4 | 9 |
| CN05KB3GA43  | CN3 | Malus x domestica | Royal Gala | China | 17 | 2  | ?  | 2 | 12 | 7 | 9  | 5  | 11 | 10 | 4 | 9 |
| CN05KB3GA44  | CN3 | Malus x domestica | Royal Gala | China | 12 | 9  | 11 | 2 | 4  | 7 | 9  | 6  | 5  | 10 | 4 | 7 |
| CN05KB3GA45  | CN3 | Malus x domestica | Royal Gala | China | 12 | 10 | ?  | 2 | 9  | 7 | 9  | 6  | 5  | 11 | 5 | 8 |
| CN05KB3GA48  | CN3 | Malus x domestica | Royal Gala | China | 15 | 11 | 3  | 2 | 13 | 7 | 9  | 5  | 11 | 9  | 4 | 9 |
| CN05KB3GA49  | CN3 | Malus x domestica | Royal Gala | China | 13 | 9  | 4  | 2 | 4  | 7 | 7  | 5  | 5  | 9  | 5 | 7 |
| CN05KB3GA5   | CN3 | Malus x domestica | Royal Gala | China | 11 | 9  | 5  | 2 | 7  | 6 | 8  | 4  | 11 | 4  | 4 | 8 |
| CN05KB3GA50  | CN3 | Malus x domestica | Royal Gala | China | 12 | 9  | 11 | 2 | 6  | 7 | 16 | 6  | 5  | 8  | 4 | 7 |
| CN05KB3GA6   | CN3 | Malus x domestica | Royal Gala | China | 11 | 9  | 6  | 2 | 7  | 6 | ?  | 7  | 5  | 13 | 4 | 9 |
| CN05KB3GA8   | CN3 | Malus x domestica | Royal Gala | China | 12 | 2  | 20 | 2 | 12 | 7 | 10 | 8  | 5  | 9  | 5 | 8 |
| CN05KB3GA9   | CN3 | Malus x domestica | Royal Gala | China | 11 | ?  | 6  | 2 | 7  | 6 | 9  | 6  | 5  | ?  | 4 | 9 |
| CN05SG1.1.2  | CN4 | Malus x domestica | xxx        | China | 11 | 9  | 10 | 2 | 13 | 7 | 7  | 5  | 12 | 9  | 6 | 9 |
| CN05SG1.10.2 | CN4 | Malus x domestica | xxx        | China | 13 | 9  | 7  | 2 | 7  | 7 | 7  | 6  | 5  | 10 | 5 | 8 |
| CN05SG1.11.1 | CN4 | Malus x domestica | xxx        | China | 10 | 9  | 11 | 2 | 8  | 7 | 8  | 5  | 5  | 9  | 4 | 8 |
| CN05SG1.12.1 | CN4 | Malus x domestica | xxx        | China | 5  | 9  | 5  | 2 | 8  | 7 | 7  | 7  | 5  | 16 | 4 | 7 |
| CN05SG1.13.2 | CN4 | Malus x domestica | xxx        | China | 11 | 9  | 8  | 2 | 5  | 9 | ?  | ?  | 5  | 10 | 7 | 8 |
| CN05SG1.14.2 | CN4 | Malus x domestica | xxx        | China | 11 | 11 | 2  | 2 | 13 | 7 | 9  | 10 | 12 | 10 | 6 | 9 |
| CN05SG1.15.1 | CN4 | Malus x domestica | xxx        | China | 4  | 9  | 14 | 2 | 7  | 7 | 9  | 7  | 5  | 9  | 5 | 8 |
| CN05SG1.16.2 | CN4 | Malus x domestica | xxx        | China | 5  | 9  | 2  | 2 | 17 | 7 | 7  | 12 | 12 | 15 | 4 | 7 |
| CN05SG1.17.2 | CN4 | Malus x domestica | xxx        | China | 11 | 2  | 6  | 2 | 11 | 7 | 9  | 5  | 5  | 9  | 6 | 8 |
| CN05SG1.18.1 | CN4 | Malus x domestica | xxx        | China | ?  | ?  | 6  | 2 | 5  | 7 | 9  | 5  | 5  | 9  | 5 | 8 |
| CN05SG1.19.2 | CN4 | Malus x domestica | xxx        | China | 11 | 9  | 16 | 2 | 7  | 7 | 9  | 6  | 11 | 9  | 4 | 7 |
| CN05SG1.2.2  | CN4 | Malus x domestica | xxx        | China | ?  | 9  | 1  | 2 | 5  | 7 | 10 | ?  | 5  | 10 | 7 | 8 |
| CN05SG1.20.2 | CN4 | Malus x domestica | xxx        | China | 11 | 9  | ?  | 2 | 6  | 5 | 9  | 5  | 14 | 16 | 5 | 7 |
| CN05SG1.21.1 | CN4 | Malus x domestica | xxx        | China | 6  | 21 | ?  | 2 | 10 | 5 | ?  | 4  | 5  | 20 | 5 | 9 |
| CN05SG1.22.2 | CN4 | Malus x domestica | xxx        | China | 11 | 9  | 7  | 3 | 5  | 7 | 9  | 8  | 5  | 10 | 5 | 9 |

|               |     |                   |                  |       |    |    |    |   |    |   |    |    |    |    |   |    |
|---------------|-----|-------------------|------------------|-------|----|----|----|---|----|---|----|----|----|----|---|----|
| CN05SG1.23.2  | CN4 | Malus x domestica | xxx              | China | 14 | 14 | 2  | 2 | 7  | 7 | 9  | 5  | 5  | 10 | 5 | 4  |
| CN05SG1.24.2  | CN4 | Malus x domestica | xxx              | China | ?  | 11 | ?  | 2 | 7  | 7 | 9  | 7  | 5  | 10 | 6 | 7  |
| CN05SG1.25.2  | CN4 | Malus x domestica | xxx              | China | 10 | 10 | 8  | 2 | 6  | 7 | 10 | 7  | 5  | 11 | 6 | 7  |
| CN05SG1.26.1  | CN4 | Malus x domestica | xxx              | China | 11 | 21 | 7  | 2 | 5  | 5 | 4  | 8  | 5  | 9  | 5 | 8  |
| CN05SG1.27.2  | CN4 | Malus x domestica | xxx              | China | 9  | 9  | 13 | 2 | 13 | 7 | 9  | 6  | 5  | 10 | 5 | 9  |
| CN05SG1.28.1  | CN4 | Malus x domestica | xxx              | China | 11 | 9  | 8  | 2 | 8  | 7 | 7  | 5  | 5  | 16 | 8 | 9  |
| CN05SG1.29.1  | CN4 | Malus x domestica | xxx              | China | 12 | ?  | ?  | 2 | 7  | 7 | 6  | 7  | 11 | 12 | 4 | 8  |
| CN05SG1.3.1   | CN4 | Malus x domestica | xxx              | China | 7  | 2  | 14 | 2 | 16 | 7 | 7  | 5  | 5  | 10 | 5 | 7  |
| CN05SG1.30.1  | CN4 | Malus x domestica | xxx              | China | 12 | 9  | 6  | 2 | 7  | 9 | 7  | 5  | ?  | 8  | 5 | 7  |
| CN05SG1.31.1  | CN4 | Malus x domestica | xxx              | China | 9  | 14 | 2  | 2 | 9  | 7 | ?  | 6  | 5  | 8  | 5 | 8  |
| CN05SG1.32.1  | CN4 | Malus x domestica | xxx              | China | 13 | 9  | 17 | 2 | 2  | 7 | 9  | 6  | 5  | 10 | 5 | 7  |
| CN05SG1.33.1  | CN4 | Malus x domestica | xxx              | China | 13 | 2  | 18 | 2 | 8  | 7 | 7  | 6  | 5  | 11 | 5 | 7  |
| CN05SG1.34.1  | CN4 | Malus x domestica | xxx              | China | ?  | ?  | 18 | ? | 17 | 9 | 13 | 12 | 14 | 10 | 5 | 8  |
| CN05SG1.35.1  | CN4 | Malus x domestica | xxx              | China | 13 | 11 | 7  | 4 | 5  | 7 | 9  | 5  | 5  | 9  | 6 | 8  |
| CN05SG1.36.1  | CN4 | Malus x domestica | xxx              | China | 13 | 10 | 17 | 3 | 13 | 5 | 14 | 6  | 5  | 13 | 6 | 8  |
| CN05SG1.37.1  | CN4 | Malus x domestica | xxx              | China | 22 | 9  | ?  | 4 | 13 | 7 | 11 | 5  | 5  | 9  | 6 | 7  |
| CN05SG1.38.1  | CN4 | Malus x domestica | xxx              | China | 10 | 11 | 14 | 2 | 2  | 9 | 10 | 6  | 5  | 9  | 5 | 8  |
| CN05SG1.39.1  | CN4 | Malus x domestica | xxx              | China | 11 | 9  | 8  | 2 | 8  | 7 | 7  | 5  | 5  | 16 | 8 | 9  |
| CN05SG1.4.1   | CN4 | Malus x domestica | xxx              | China | 10 | 9  | 7  | 2 | 7  | 7 | 9  | 8  | 5  | 9  | 7 | 9  |
| CN05SG1.40.1  | CN4 | Malus x domestica | xxx              | China | 10 | 9  | 7  | 2 | 13 | 9 | 7  | 6  | 5  | 9  | 5 | 8  |
| CN05SG1.5.1   | CN4 | Malus x domestica | xxx              | China | 12 | 9  | 14 | 2 | 9  | 7 | ?  | 5  | 5  | 10 | 4 | 8  |
| CN05SG1.6.1   | CN4 | Malus x domestica | xxx              | China | 9  | 9  | ?  | 2 | 5  | 1 | 7  | 8  | 5  | 9  | 4 | 7  |
| CN05SG1.7.1   | CN4 | Malus x domestica | xxx              | China | 13 | 9  | 3  | 2 | 8  | 7 | 7  | 7  | 5  | 15 | 8 | 7  |
| CN05SG1.8.1   | CN4 | Malus x domestica | xxx              | China | 12 | 9  | 4  | 2 | 5  | 7 | 7  | 5  | 5  | 9  | 8 | 7  |
| CN05SG1.9.2   | CN4 | Malus x domestica | xxx              | China | 4  | 11 | 14 | 3 | 7  | 7 | 13 | 9  | 5  | 10 | 7 | 10 |
| CN05YI2GO1.3  | CN5 | Malus x domestica | Golden Delicious | China | 15 | 3  | 18 | 4 | 5  | 7 | 9  | 7  | 5  | 10 | 6 | 7  |
| CN05YI2GO10   | CN5 | Malus x domestica | Golden Delicious | China | 13 | 11 | 8  | 2 | 5  | 7 | 8  | 11 | 15 | 10 | 4 | 9  |
| CN05YI2GO11.2 | CN5 | Malus x domestica | Golden Delicious | China | 10 | 9  | 14 | 2 | 7  | 7 | 4  | 5  | 5  | 11 | 7 | 7  |
| CN05YI2GO12.2 | CN5 | Malus x domestica | Golden Delicious | China | 13 | 9  | 8  | 2 | 13 | 7 | 9  | 6  | 5  | 10 | 4 | 8  |
| CN05YI2GO13.1 | CN5 | Malus x domestica | Golden Delicious | China | 10 | 2  | 10 | 2 | 11 | 7 | 8  | 10 | 15 | 9  | 4 | 8  |
| CN05YI2GO14   | CN5 | Malus x domestica | Golden Delicious | China | 16 | 9  | 6  | 2 | 7  | 7 | 8  | 9  | 12 | 3  | 4 | 8  |
| CN05YI2GO15   | CN5 | Malus x domestica | Golden Delicious | China | 13 | 9  | 13 | 2 | 6  | 7 | 9  | 8  | 15 | 10 | 4 | 7  |
| CN05YI2GO16.2 | CN5 | Malus x domestica | Golden Delicious | China | 13 | 9  | 14 | 2 | 2  | 7 | 9  | 5  | 5  | 9  | 7 | 8  |
| CN05YI2GO17   | CN5 | Malus x domestica | Golden Delicious | China | 12 | 2  | ?  | 2 | 5  | 7 | 7  | 12 | 5  | ?  | 7 | 7  |
| CN05YI2GO18   | CN5 | Malus x domestica | Golden Delicious | China | 3  | 9  | 9  | 2 | 7  | 6 | 8  | 5  | 5  | 9  | 7 | 7  |
| CN05YI2GO2    | CN5 | Malus x domestica | Golden Delicious | China | 9  | 9  | 4  | 2 | 7  | 7 | 8  | 5  | 18 | 12 | 5 | 8  |
| CN05YI2GO20   | CN5 | Malus x domestica | Golden Delicious | China | 12 | 21 | 6  | 2 | ?  | 7 | 9  | 6  | 5  | 17 | 4 | 7  |
| CN05YI2GO21   | CN5 | Malus x domestica | Golden Delicious | China | 13 | 9  | 4  | 2 | 13 | 7 | 9  | 7  | 5  | 12 | 5 | 7  |
| CN05YI2GO22   | CN5 | Malus x domestica | Golden Delicious | China | 15 | 9  | 16 | 2 | ?  | 7 | ?  | 5  | 5  | 11 | 5 | 8  |
| CN05YI2GO23   | CN5 | Malus x domestica | Golden Delicious | China | 11 | 9  | 14 | 2 | 1  | 7 | 10 | ?  | 15 | 9  | 4 | 8  |
| CN05YI2GO24   | CN5 | Malus x domestica | Golden Delicious | China | 6  | 14 | 4  | 2 | 6  | 7 | 11 | 5  | 5  | 11 | 4 | 8  |

|               |     |                   |                  |       |    |    |    |   |    |   |    |    |    |    |   |   |
|---------------|-----|-------------------|------------------|-------|----|----|----|---|----|---|----|----|----|----|---|---|
| CN05Y12GO25.2 | CN5 | Malus x domestica | Golden Delicious | China | 10 | 2  | 10 | 2 | 11 | 7 | 8  | 10 | 15 | 9  | 4 | 8 |
| CN05Y12GO3    | CN5 | Malus x domestica | Golden Delicious | China | 10 | 11 | 6  | 2 | 6  | 6 | 9  | 12 | 16 | 12 | 4 | 7 |
| CN05Y12GO4    | CN5 | Malus x domestica | Golden Delicious | China | 16 | 10 | ?  | 2 | 8  | 7 | 9  | 7  | 5  | 12 | 5 | 3 |
| CN05Y12GO5.3  | CN5 | Malus x domestica | Golden Delicious | China | 11 | 9  | 4  | 2 | 7  | 7 | 10 | 5  | 12 | 11 | 4 | 9 |
| CN05Y12GO6    | CN5 | Malus x domestica | Golden Delicious | China | 9  | 10 | 13 | 2 | 8  | 6 | 9  | 9  | 5  | 9  | 5 | 8 |
| CN05Y12GO7.2  | CN5 | Malus x domestica | Golden Delicious | China | 17 | 21 | 18 | 2 | 7  | 7 | 9  | 6  | 5  | 11 | 5 | 7 |
| CN05Y12GO8    | CN5 | Malus x domestica | Golden Delicious | China | 3  | 9  | 5  | 2 | ?  | 7 | 9  | 5  | 8  | 10 | 4 | 7 |
| CN05Y12GO9    | CN5 | Malus x domestica | Golden Delicious | China | 13 | 14 | 14 | 2 | 12 | 7 | 9  | 5  | 5  | 10 | 6 | 7 |
| CN05Y12GO9.2  | CN5 | Malus x domestica | Golden Delicious | China | 13 | 14 | 14 | 2 | 12 | 7 | 9  | 5  | 5  | 10 | 6 | 7 |
| CN05Y13NC10   | CN6 | Malus x domestica | New Century      | China | 13 | 9  | 14 | 2 | 5  | 7 | 9  | 12 | 7  | 10 | 5 | 8 |
| CN05Y13NC14   | CN6 | Malus x domestica | New Century      | China | 10 | 10 | 17 | 2 | 13 | 7 | 11 | 6  | 8  | 9  | 5 | 8 |
| CN05Y13NC15   | CN6 | Malus x domestica | New Century      | China | 12 | 9  | 23 | 2 | 4  | 7 | 10 | 6  | 5  | 9  | 6 | 7 |
| CN05Y13NC16   | CN6 | Malus x domestica | New Century      | China | 13 | 9  | ?  | 2 | 5  | 9 | 7  | 12 | 5  | 9  | 6 | 8 |
| CN05Y13NC17   | CN6 | Malus x domestica | New Century      | China | 16 | 2  | 6  | 2 | 8  | 9 | 7  | 12 | 5  | 11 | 5 | 8 |
| CN05Y13NC18   | CN6 | Malus x domestica | New Century      | China | 5  | 21 | 20 | 2 | 7  | 7 | ?  | 6  | 5  | 9  | 6 | 8 |
| CN05Y13NC19   | CN6 | Malus x domestica | New Century      | China | 11 | 21 | 10 | 2 | 7  | 7 | 9  | 3  | 4  | 16 | 5 | 7 |
| CN05Y13NC22   | CN6 | Malus x domestica | New Century      | China | 10 | 9  | 8  | 2 | 17 | 7 | 10 | 9  | 5  | 12 | 4 | 8 |
| CN05Y13NC28   | CN6 | Malus x domestica | New Century      | China | 12 | 10 | 10 | 2 | 7  | 7 | 8  | 6  | 5  | 8  | 4 | 9 |
| CN05Y13NC31   | CN6 | Malus x domestica | New Century      | China | 10 | 10 | 14 | 2 | 6  | 7 | 9  | 8  | 8  | ?  | 4 | 7 |
| CN05Y13NC32   | CN6 | Malus x domestica | New Century      | China | ?  | 9  | 5  | 2 | 5  | 7 | 13 | 6  | 5  | 3  | 4 | 8 |
| CN05Y13NC40   | CN6 | Malus x domestica | New Century      | China | 11 | 21 | 8  | 2 | 6  | 6 | 11 | 7  | 8  | 20 | 6 | 7 |
| CN05Y13NC41   | CN6 | Malus x domestica | New Century      | China | 13 | 10 | 17 | 2 | 5  | 5 | 7  | 2  | 12 | 8  | 5 | 8 |
| CN05Y13NC42   | CN6 | Malus x domestica | New Century      | China | 12 | 9  | 8  | 2 | 4  | 7 | 11 | 7  | 5  | 9  | 4 | 7 |
| CN05Y13NC43   | CN6 | Malus x domestica | New Century      | China | 3  | 9  | ?  | 2 | ?  | 7 | 9  | 5  | 11 | 3  | 4 | 8 |
| CN05Y13NC47   | CN6 | Malus x domestica | New Century      | China | 7  | 9  | 20 | 2 | 6  | 7 | 9  | 6  | 5  | 11 | 7 | 9 |
| CN05Y13NC50   | CN6 | Malus x domestica | New Century      | China | 15 | 9  | 16 | 2 | 13 | 7 | 9  | 4  | 2  | 9  | 6 | 7 |
| CN05Y13NC51   | CN6 | Malus x domestica | New Century      | China | 13 | 10 | 5  | 2 | 7  | 7 | 13 | 3  | 5  | 4  | 5 | 8 |
| CN05Y13NC53   | CN6 | Malus x domestica | New Century      | China | 11 | 2  | 4  | 2 | ?  | 7 | 4  | 10 | 5  | 12 | 6 | 3 |
| CN05Y13NC55   | CN6 | Malus x domestica | New Century      | China | 5  | 21 | 2  | 2 | 5  | 7 | 13 | 6  | 5  | 13 | 7 | 8 |
| CN05Y13NC57   | CN6 | Malus x domestica | New Century      | China | 12 | 9  | 15 | 3 | 17 | 7 | 9  | 7  | 5  | 11 | 4 | 8 |
| CN05Y13NC6    | CN6 | Malus x domestica | New Century      | China | 9  | 2  | 6  | 2 | 23 | 7 | 6  | 7  | 5  | 9  | 4 | 8 |
| CN05Y13NC61   | CN6 | Malus x domestica | New Century      | China | 3  | 11 | 4  | 2 | 6  | 7 | 9  | 9  | 9  | 10 | 4 | 7 |
| CN05Y13NC67   | CN6 | Malus x domestica | New Century      | China | 12 | 11 | 19 | 3 | 8  | 6 | 9  | 5  | 5  | 11 | 4 | 8 |
| CN05Y13NC68   | CN6 | Malus x domestica | New Century      | China | 12 | 9  | 32 | 3 | ?  | 6 | 9  | 2  | 12 | 10 | 4 | 8 |
| CN05Y13NC71   | CN6 | Malus x domestica | New Century      | China | 2  | 2  | 20 | 2 | 8  | 7 | 9  | 6  | 9  | 9  | 4 | 8 |
| CN05Y14GA1    | CN7 | Malus x domestica | Royal Gala       | China | 17 | 14 | 10 | 2 | 7  | 4 | 13 | 8  | 5  | 7  | 5 | 8 |
| CN05Y14GA10   | CN7 | Malus x domestica | Royal Gala       | China | 6  | 9  | 5  | 2 | 13 | 6 | 8  | 13 | 5  | 10 | 6 | 7 |
| CN05Y14GA11   | CN7 | Malus x domestica | Royal Gala       | China | 12 | 9  | 4  | 2 | 5  | 9 | 9  | 3  | 8  | 8  | 8 | 7 |
| CN05Y14GA12   | CN7 | Malus x domestica | Royal Gala       | China | 6  | 9  | 5  | 2 | 13 | 6 | 8  | 5  | 5  | 10 | 6 | 7 |
| CN05Y14GA13   | CN7 | Malus x domestica | Royal Gala       | China | 11 | 4  | 8  | 2 | 5  | 7 | 9  | 12 | 5  | 11 | 8 | 8 |
| CN05Y14GA14   | CN7 | Malus x domestica | Royal Gala       | China | ?  | 9  | 10 | 2 | 13 | 7 | 10 | 5  | 2  | 11 | 4 | 2 |

|             |     |                   |            |       |    |    |    |   |    |   |    |    |    |    |    |    |
|-------------|-----|-------------------|------------|-------|----|----|----|---|----|---|----|----|----|----|----|----|
| CN05Y14GA15 | CN7 | Malus x domestica | Royal Gala | China | 12 | 10 | ?  | 3 | 8  | 6 | 11 | 8  | 5  | 13 | 7  | 8  |
| CN05Y14GA16 | CN7 | Malus x domestica | Royal Gala | China | 18 | 10 | 10 | 2 | 5  | 7 | 9  | 7  | 12 | 12 | 8  | 7  |
| CN05Y14GA17 | CN7 | Malus x domestica | Royal Gala | China | 6  | 9  | 5  | 2 | 13 | 6 | 8  | 13 | 5  | 10 | 6  | 7  |
| CN05Y14GA18 | CN7 | Malus x domestica | Royal Gala | China | 13 | 10 | 3  | 2 | 5  | 7 | ?  | 7  | 5  | 10 | 4  | 7  |
| CN05Y14GA19 | CN7 | Malus x domestica | Royal Gala | China | 6  | ?  | 11 | 2 | 8  | 7 | 9  | 5  | 12 | 10 | 4  | 8  |
| CN05Y14GA2  | CN7 | Malus x domestica | Royal Gala | China | 9  | 9  | 10 | 2 | 5  | 7 | 9  | 5  | 5  | 9  | 5  | 7  |
| CN05Y14GA20 | CN7 | Malus x domestica | Royal Gala | China | 6  | 9  | 5  | 2 | 6  | 6 | 9  | 13 | 2  | 10 | 4  | 7  |
| CN05Y14GA21 | CN7 | Malus x domestica | Royal Gala | China | 4  | 11 | 5  | 2 | 5  | 1 | 3  | 6  | 9  | 8  | 4  | 8  |
| CN05Y14GA22 | CN7 | Malus x domestica | Royal Gala | China | 19 | 15 | 10 | 2 | 6  | 7 | 9  | 5  | 2  | 11 | 4  | 8  |
| CN05Y14GA23 | CN7 | Malus x domestica | Royal Gala | China | 11 | 10 | 2  | 2 | 8  | 1 | 10 | 5  | 10 | 10 | 4  | 7  |
| CN05Y14GA24 | CN7 | Malus x domestica | Royal Gala | China | 13 | 10 | ?  | 2 | 6  | 6 | 7  | 7  | 5  | 11 | 8  | 8  |
| CN05Y14GA25 | CN7 | Malus x domestica | Royal Gala | China | 13 | 10 | 10 | 2 | 6  | 7 | 9  | 6  | 5  | 12 | 7  | ?  |
| CN05Y14GA26 | CN7 | Malus x domestica | Royal Gala | China | 6  | 9  | 5  | 2 | 13 | 6 | 8  | 13 | 5  | 10 | 6  | 7  |
| CN05Y14GA27 | CN7 | Malus x domestica | Royal Gala | China | 16 | 9  | ?  | 2 | 8  | 7 | 12 | 6  | 5  | 13 | 4  | 10 |
| CN05Y14GA28 | CN7 | Malus x domestica | Royal Gala | China | 10 | 9  | 19 | 5 | 3  | 3 | 9  | 6  | 8  | 12 | 5  | 8  |
| CN05Y14GA29 | CN7 | Malus x domestica | Royal Gala | China | 13 | 2  | 5  | 2 | 7  | 7 | 9  | 5  | 5  | 9  | 10 | 7  |
| CN05Y14GA3  | CN7 | Malus x domestica | Royal Gala | China | 13 | 9  | 3  | 2 | 11 | 6 | 9  | 5  | 14 | 12 | 8  | 8  |
| CN05Y14GA30 | CN7 | Malus x domestica | Royal Gala | China | 17 | 10 | 6  | 2 | 7  | 9 | 13 | 17 | 4  | 9  | 5  | 8  |
| CN05Y14GA31 | CN7 | Malus x domestica | Royal Gala | China | 13 | 9  | 3  | 2 | 11 | 6 | 9  | 5  | 14 | 12 | 8  | 8  |
| CN05Y14GA32 | CN7 | Malus x domestica | Royal Gala | China | 13 | 10 | ?  | 2 | 7  | 6 | 9  | 7  | 5  | 10 | 4  | 8  |
| CN05Y14GA33 | CN7 | Malus x domestica | Royal Gala | China | 16 | 2  | 27 | 2 | 13 | 7 | 9  | 2  | 5  | 9  | 6  | 7  |
| CN05Y14GA34 | CN7 | Malus x domestica | Royal Gala | China | 10 | 10 | ?  | 2 | 8  | 7 | 9  | 5  | 15 | ?  | 4  | 8  |
| CN05Y14GA35 | CN7 | Malus x domestica | Royal Gala | China | 4  | 2  | 13 | 4 | 7  | 7 | 9  | 8  | 5  | 9  | 6  | 7  |
| CN05Y14GA37 | CN7 | Malus x domestica | Royal Gala | China | 13 | 10 | 21 | 2 | 8  | 7 | 9  | 5  | 8  | 11 | 5  | 7  |
| CN05Y14GA38 | CN7 | Malus x domestica | Royal Gala | China | 10 | 9  | ?  | 2 | 7  | 6 | 10 | ?  | 13 | 11 | 6  | 3  |
| CN05Y14GA39 | CN7 | Malus x domestica | Royal Gala | China | 13 | 10 | ?  | 2 | 6  | 6 | 8  | 7  | 5  | 10 | 4  | 8  |
| CN05Y14GA4  | CN7 | Malus x domestica | Royal Gala | China | 13 | 2  | 3  | 2 | 8  | 7 | 9  | 6  | 12 | 10 | 5  | 7  |
| CN05Y14GA40 | CN7 | Malus x domestica | Royal Gala | China | 14 | 9  | 8  | 2 | 7  | 7 | 11 | 8  | 5  | 9  | 6  | 7  |
| CN05Y14GA41 | CN7 | Malus x domestica | Royal Gala | China | 3  | 10 | ?  | 2 | 5  | 9 | 10 | 5  | 5  | 8  | 11 | 7  |
| CN05Y14GA42 | CN7 | Malus x domestica | Royal Gala | China | 10 | 9  | ?  | 2 | 7  | ? | 9  | 7  | 8  | 3  | 6  | 9  |
| CN05Y14GA43 | CN7 | Malus x domestica | Royal Gala | China | 12 | 9  | ?  | 2 | ?  | 7 | 7  | 5  | 5  | 11 | 5  | 7  |
| CN05Y14GA44 | CN7 | Malus x domestica | Royal Gala | China | 12 | 9  | 4  | 2 | ?  | 7 | ?  | 5  | 5  | 11 | 4  | 7  |
| CN05Y14GA5  | CN7 | Malus x domestica | Royal Gala | China | 6  | 3  | 4  | 2 | 13 | 6 | 9  | 6  | 5  | 10 | 4  | 8  |
| CN05Y14GA6  | CN7 | Malus x domestica | Royal Gala | China | 6  | 10 | 5  | 2 | 11 | 6 | 9  | 13 | 5  | ?  | 6  | 7  |
| CN05Y14GA7  | CN7 | Malus x domestica | Royal Gala | China | 3  | 9  | 12 | 2 | 6  | 6 | 8  | 12 | 12 | 10 | 4  | 7  |
| CN05Y14GA8  | CN7 | Malus x domestica | Royal Gala | China | 12 | 11 | 14 | 2 | 8  | 7 | 11 | 7  | 5  | 10 | 6  | 8  |
| CN05Y14GA9  | CN7 | Malus x domestica | Royal Gala | China | 19 | 9  | 5  | 2 | 5  | 7 | 9  | 10 | 2  | 12 | 6  | 8  |
| CN05Y15GA1  | CN7 | Malus x domestica | Royal Gala | China | 11 | 9  | 8  | 2 | 5  | 6 | 10 | 2  | 8  | 9  | 6  | 7  |
| CN05Y15GA10 | CN7 | Malus x domestica | Royal Gala | China | 13 | 2  | ?  | 2 | 13 | 7 | 9  | 12 | 9  | 10 | 8  | 8  |
| CN05Y15GA11 | CN7 | Malus x domestica | Royal Gala | China | 14 | 9  | ?  | 2 | 18 | 7 | 7  | 7  | 8  | 14 | 4  | 8  |
| CN05Y15GA12 | CN7 | Malus x domestica | Royal Gala | China | 11 | 9  | 2  | 2 | 5  | 7 | ?  | 6  | 8  | 13 | 6  | 8  |

|             |     |                   |                  |       |    |    |    |   |    |   |    |    |    |    |    |   |
|-------------|-----|-------------------|------------------|-------|----|----|----|---|----|---|----|----|----|----|----|---|
| CN05Y15GA13 | CN7 | Malus x domestica | Royal Gala       | China | 6  | 9  | 2  | 2 | 8  | 6 | 7  | 5  | 5  | 11 | 8  | 7 |
| CN05Y15GA14 | CN7 | Malus x domestica | Royal Gala       | China | 6  | 9  | 14 | 2 | 7  | 7 | 14 | 12 | 5  | 8  | 6  | 7 |
| CN05Y15GA15 | CN7 | Malus x domestica | Royal Gala       | China | 19 | 2  | 10 | 2 | 7  | 7 | 11 | 5  | 15 | 7  | 4  | 8 |
| CN05Y15GA16 | CN7 | Malus x domestica | Royal Gala       | China | 11 | 2  | 13 | 2 | 8  | 6 | 6  | 5  | 8  | 11 | 4  | 9 |
| CN05Y15GA17 | CN7 | Malus x domestica | Royal Gala       | China | 3  | 10 | 12 | 2 | 7  | 9 | 7  | 7  | 9  | 11 | 4  | 8 |
| CN05Y15GA18 | CN7 | Malus x domestica | Royal Gala       | China | 13 | 11 | 13 | 2 | 13 | 7 | 10 | 7  | 5  | 11 | 6  | 7 |
| CN05Y15GA2  | CN7 | Malus x domestica | Royal Gala       | China | 12 | 9  | 6  | 4 | 6  | 7 | 7  | 5  | 8  | 10 | 4  | 8 |
| CN05Y15GA20 | CN7 | Malus x domestica | Royal Gala       | China | 8  | 9  | 10 | 2 | 5  | 7 | 10 | 12 | 5  | 6  | 7  | 7 |
| CN05Y15GA22 | CN7 | Malus x domestica | Royal Gala       | China | 9  | 19 | 14 | 2 | 5  | 7 | 9  | 12 | 8  | 10 | 5  | 7 |
| CN05Y15GA23 | CN7 | Malus x domestica | Royal Gala       | China | 14 | 11 | 10 | 2 | 10 | 7 | 8  | 5  | 1  | 11 | 5  | 7 |
| CN05Y15GA24 | CN7 | Malus x domestica | Royal Gala       | China | 11 | 10 | 7  | 4 | 5  | 9 | 9  | 9  | 5  | 10 | 7  | 7 |
| CN05Y15GA25 | CN7 | Malus x domestica | Royal Gala       | China | 2  | 9  | 5  | 2 | 8  | 7 | 10 | 9  | 2  | 9  | 6  | 7 |
| CN05Y15GA26 | CN7 | Malus x domestica | Royal Gala       | China | 12 | 11 | 10 | 2 | 14 | 6 | 7  | 6  | 5  | 21 | 6  | 9 |
| CN05Y15GA27 | CN7 | Malus x domestica | Royal Gala       | China | 13 | 9  | 16 | 2 | 5  | 7 | 9  | 16 | 5  | 10 | 6  | 8 |
| CN05Y15GA28 | CN7 | Malus x domestica | Royal Gala       | China | 10 | 9  | 14 | 3 | 5  | 7 | 11 | 8  | 5  | 16 | 4  | 7 |
| CN05Y15GA29 | CN7 | Malus x domestica | Royal Gala       | China | 11 | 9  | 10 | 4 | 9  | 7 | 9  | 12 | 5  | 9  | 5  | 8 |
| CN05Y15GA3  | CN7 | Malus x domestica | Royal Gala       | China | 6  | 9  | 4  | 2 | 8  | 7 | 8  | 5  | 5  | 9  | 6  | 8 |
| CN05Y15GA30 | CN7 | Malus x domestica | Royal Gala       | China | 17 | 9  | 8  | 2 | 5  | 9 | 11 | 8  | 7  | 10 | 4  | 7 |
| CN05Y15GA4  | CN7 | Malus x domestica | Royal Gala       | China | 12 | 2  | 6  | 2 | 8  | 7 | 9  | 6  | 7  | 10 | 4  | 8 |
| CN05Y15GA5  | CN7 | Malus x domestica | Royal Gala       | China | 11 | 10 | ?  | 3 | 5  | 7 | ?  | 8  | 4  | 10 | 4  | 7 |
| CN05Y15GA6  | CN7 | Malus x domestica | Royal Gala       | China | 13 | 10 | 17 | 2 | ?  | 7 | ?  | 6  | 5  | 10 | 5  | 7 |
| CN05Y15GA7  | CN7 | Malus x domestica | Royal Gala       | China | 10 | 9  | ?  | 2 | 5  | 7 | 9  | 7  | 5  | ?  | 4  | 8 |
| IR04S1.1b   | IR1 | Malus x domestica | Golden Delicious | Iran  | 9  | 2  | 10 | 2 | 2  | 7 | 9  | 5  | 5  | 9  | 4  | ? |
| IR04S1.1.1  | IR1 | Malus x domestica | Golden Delicious | Iran  | 14 | 9  | 12 | 3 | 7  | 7 | 7  | 2  | 5  | 12 | 5  | 8 |
| IR04S1.10b  | IR1 | Malus x domestica | Golden Delicious | Iran  | 12 | 9  | 17 | ? | 2  | 7 | 9  | 5  | 5  | 11 | 4  | 8 |
| IR04S1.10.1 | IR1 | Malus x domestica | Golden Delicious | Iran  | 13 | 9  | ?  | 2 | 7  | 7 | 7  | 2  | 2  | ?  | 4  | 8 |
| IR04S1.11b  | IR1 | Malus x domestica | Golden Delicious | Iran  | 6  | 9  | 25 | 2 | 5  | 6 | ?  | 13 | 12 | 12 | 4  | 9 |
| IR04S1.11.1 | IR1 | Malus x domestica | Golden Delicious | Iran  | 11 | 2  | 17 | 4 | 8  | 7 | 7  | 12 | 5  | ?  | 3  | 8 |
| IR04S1.12b  | IR1 | Malus x domestica | Golden Delicious | Iran  | 5  | 2  | 4  | 2 | 6  | 7 | ?  | 6  | 12 | 12 | 5  | 8 |
| IR04S1.12.1 | IR1 | Malus x domestica | Golden Delicious | Iran  | 6  | 10 | 10 | 2 | ?  | 7 | 7  | 5  | 5  | ?  | 5  | 8 |
| IR04S1.13.1 | IR1 | Malus x domestica | Golden Delicious | Iran  | 4  | 9  | ?  | 2 | 17 | 7 | 9  | 5  | 8  | 16 | 7  | 7 |
| IR04S1.14.1 | IR1 | Malus x domestica | Golden Delicious | Iran  | 10 | ?  | ?  | 2 | 2  | 7 | 9  | 2  | 5  | 10 | 4  | 9 |
| IR04S1.15.1 | IR1 | Malus x domestica | Golden Delicious | Iran  | 6  | 9  | 16 | 2 | 6  | 6 | 8  | 5  | 9  | 11 | 6  | 7 |
| IR04S1.16.1 | IR1 | Malus x domestica | Golden Delicious | Iran  | 17 | ?  | 9  | ? | 17 | 6 | 8  | 5  | 5  | 9  | 8  | 7 |
| IR04S1.17.1 | IR1 | Malus x domestica | Golden Delicious | Iran  | 14 | 9  | 16 | 2 | 6  | ? | 9  | 2  | 5  | 9  | 4  | ? |
| IR04S1.18.1 | IR1 | Malus x domestica | Golden Delicious | Iran  | 15 | ?  | 5  | 2 | 2  | 7 | 7  | 5  | 8  | ?  | 4  | 8 |
| IR04S1.19.1 | IR1 | Malus x domestica | Golden Delicious | Iran  | 13 | ?  | 31 | 2 | 2  | 7 | 10 | 17 | 9  | 7  | 10 | 8 |
| IR04S1.2b   | IR1 | Malus x domestica | Golden Delicious | Iran  | 11 | 9  | 3  | 2 | 2  | 7 | 10 | 12 | 5  | 7  | 4  | 9 |
| IR04S1.2.1  | IR1 | Malus x domestica | Golden Delicious | Iran  | 12 | 9  | 12 | 2 | 2  | 7 | 8  | 5  | 5  | 10 | 6  | 8 |
| IR04S1.3b   | IR1 | Malus x domestica | Golden Delicious | Iran  | 10 | 2  | 5  | 2 | 2  | 7 | 9  | 2  | 5  | 10 | 5  | 7 |
| IR04S1.3.1  | IR1 | Malus x domestica | Golden Delicious | Iran  | 14 | 9  | 18 | 2 | 2  | 9 | 7  | 5  | 2  | 5  | 5  | 6 |

|             |     |                   |                  |      |    |    |    |   |    |   |    |    |    |    |   |    |
|-------------|-----|-------------------|------------------|------|----|----|----|---|----|---|----|----|----|----|---|----|
| IR04S1.4b   | IR1 | Malus x domestica | Golden Delicious | Iran | 12 | 2  | 5  | 2 | 7  | 7 | 7  | 5  | 5  | 16 | 5 | 8  |
| IR04S1.4.1  | IR1 | Malus x domestica | Golden Delicious | Iran | 6  | 9  | 15 | 2 | ?  | 9 | 10 | 5  | 2  | ?  | 6 | 9  |
| IR04S1.5b   | IR1 | Malus x domestica | Golden Delicious | Iran | 12 | 10 | 10 | 2 | 2  | 7 | 19 | 11 | 5  | 8  | 4 | 7  |
| IR04S1.5.1  | IR1 | Malus x domestica | Golden Delicious | Iran | 3  | 10 | ?  | 2 | 17 | 7 | 9  | 5  | 5  | 13 | 5 | 8  |
| IR04S1.6b   | IR1 | Malus x domestica | Golden Delicious | Iran | 6  | 2  | 6  | 2 | 7  | 7 | ?  | 5  | 5  | 3  | 4 | 7  |
| IR04S1.6.1  | IR1 | Malus x domestica | Golden Delicious | Iran | 11 | 9  | 17 | 2 | 2  | 6 | 10 | 8  | 2  | 9  | 6 | 7  |
| IR04S1.7b   | IR1 | Malus x domestica | Golden Delicious | Iran | 17 | 9  | 5  | 3 | 2  | 7 | 8  | 13 | 2  | 9  | 4 | 9  |
| IR04S1.7.1  | IR1 | Malus x domestica | Golden Delicious | Iran | 12 | 2  | 6  | 2 | 8  | 6 | 5  | 8  | 5  | 9  | 4 | 7  |
| IR04S1.8b   | IR1 | Malus x domestica | Golden Delicious | Iran | 6  | 9  | 17 | 2 | 2  | 7 | 5  | 6  | 9  | 10 | 4 | 9  |
| IR04S1.8.1  | IR1 | Malus x domestica | Golden Delicious | Iran | 6  | 9  | 10 | 2 | 8  | ? | 8  | 7  | 5  | 10 | 5 | ?  |
| IR04S1.9b   | IR1 | Malus x domestica | Golden Delicious | Iran | 12 | 9  | 16 | 2 | 6  | 7 | 10 | 5  | 8  | 9  | 4 | 8  |
| IR04S1.9.1  | IR1 | Malus x domestica | Golden Delicious | Iran | 5  | 9  | 15 | 2 | 2  | 9 | 9  | 9  | 5  | 4  | 6 | 8  |
| IR04S2.1    | IR1 | Malus x domestica | Golden Delicious | Iran | 11 | 9  | 6  | 3 | 2  | 7 | 8  | 9  | 5  | 7  | 5 | ?  |
| IR04S2.1.1  | IR1 | Malus x domestica | Golden Delicious | Iran | 4  | 9  | 15 | 2 | 6  | 7 | 8  | 6  | 5  | 13 | 4 | 7  |
| IR04S2.10   | IR1 | Malus x domestica | Golden Delicious | Iran | 6  | 9  | 9  | 3 | 8  | 7 | 11 | 2  | 9  | 16 | 4 | 9  |
| IR04S2.11   | IR1 | Malus x domestica | Golden Delicious | Iran | 12 | 9  | 6  | 2 | 2  | 7 | 9  | 7  | 8  | 14 | 4 | 6  |
| IR04S2.12   | IR1 | Malus x domestica | Golden Delicious | Iran | 6  | 9  | 5  | 2 | 13 | 7 | 11 | 6  | 5  | 5  | 5 | 7  |
| IR04S2.2    | IR1 | Malus x domestica | Golden Delicious | Iran | 6  | 9  | 14 | 3 | 6  | 7 | 11 | 5  | 5  | 4  | 5 | 8  |
| IR04S2.2.1  | IR1 | Malus x domestica | Golden Delicious | Iran | 15 | 2  | 6  | 2 | 2  | 9 | 8  | 6  | 5  | 4  | 9 | 9  |
| IR04S2.3    | IR1 | Malus x domestica | Golden Delicious | Iran | 6  | 10 | 6  | 2 | 5  | 7 | 19 | 7  | 5  | 10 | 4 | 7  |
| IR04S2.3.1  | IR1 | Malus x domestica | Golden Delicious | Iran | 26 | 2  | 9  | 2 | 8  | 7 | 19 | 5  | 12 | 10 | 7 | 7  |
| IR04S2.4    | IR1 | Malus x domestica | Golden Delicious | Iran | 6  | 2  | 2  | 2 | 2  | 7 | 9  | 8  | 5  | 8  | 5 | 8  |
| IR04S2.4.1  | IR1 | Malus x domestica | Golden Delicious | Iran | 6  | 2  | 3  | 2 | 2  | 7 | 5  | 8  | 5  | ?  | 4 | 9  |
| IR04S2.5    | IR1 | Malus x domestica | Golden Delicious | Iran | 6  | 9  | 17 | 2 | 2  | 7 | 7  | 2  | 2  | ?  | 4 | ?  |
| IR04S2.6    | IR1 | Malus x domestica | Golden Delicious | Iran | 11 | 10 | 18 | 2 | 2  | 7 | 7  | 2  | 9  | 7  | 4 | 8  |
| IR04S2.7    | IR1 | Malus x domestica | Golden Delicious | Iran | 6  | 9  | 12 | 3 | 8  | 7 | ?  | 3  | 9  | 16 | 4 | 9  |
| IR04S2.8    | IR1 | Malus x domestica | Golden Delicious | Iran | 5  | 9  | 3  | 2 | 2  | 7 | 8  | 5  | 6  | 15 | 4 | 9  |
| IR04S2.9    | IR1 | Malus x domestica | Golden Delicious | Iran | 11 | 2  | 12 | 3 | 2  | 7 | ?  | 5  | 5  | 12 | 5 | 7  |
| IR04S4.1b   | IR2 | Malus x domestica | Golden Delicious | Iran | 3  | 10 | 3  | 2 | 6  | 7 | ?  | 7  | 8  | 4  | 7 | ?  |
| IR04S4.1.1  | IR2 | Malus x domestica | Golden Delicious | Iran | 6  | 9  | 3  | 2 | 2  | 6 | 9  | 6  | 2  | 8  | 6 | 7  |
| IR04S4.10b  | IR2 | Malus x domestica | Golden Delicious | Iran | 12 | 9  | 18 | 2 | 6  | 7 | 9  | 7  | 6  | 13 | 4 | 9  |
| IR04S4.10.1 | IR2 | Malus x domestica | Golden Delicious | Iran | 6  | 2  | 14 | 2 | 2  | 6 | 12 | 6  | 14 | 11 | 4 | 7  |
| IR04S4.11.1 | IR2 | Malus x domestica | Golden Delicious | Iran | 11 | 9  | 13 | 2 | 2  | 7 | 8  | 5  | 5  | ?  | 4 | 8  |
| IR04S4.12.1 | IR2 | Malus x domestica | Golden Delicious | Iran | 12 | 2  | 21 | 3 | 2  | 7 | 8  | ?  | 5  | 10 | 4 | 9  |
| IR04S4.13.1 | IR2 | Malus x domestica | Golden Delicious | Iran | 18 | 9  | ?  | 2 | 9  | 7 | 9  | 6  | 5  | 9  | 4 | 8  |
| IR04S4.14.1 | IR2 | Malus x domestica | Golden Delicious | Iran | 11 | 9  | 9  | 2 | 7  | 7 | 9  | 6  | 5  | 9  | 4 | 9  |
| IR04S4.15.1 | IR2 | Malus x domestica | Golden Delicious | Iran | 13 | 9  | 6  | 2 | 6  | 6 | 9  | 9  | 3  | 5  | 5 | 8  |
| IR04S4.16.1 | IR2 | Malus x domestica | Golden Delicious | Iran | 14 | 9  | 12 | 2 | 6  | 7 | 10 | 6  | 5  | 6  | 4 | 12 |
| IR04S4.17.1 | IR2 | Malus x domestica | Golden Delicious | Iran | 13 | 9  | ?  | 2 | 6  | 7 | 11 | 2  | 5  | ?  | 5 | 7  |
| IR04S4.18.1 | IR2 | Malus x domestica | Golden Delicious | Iran | 3  | 10 | 3  | 2 | 6  | 7 | 13 | 7  | 8  | 4  | 7 | 7  |
| IR04S4.19.1 | IR2 | Malus x domestica | Golden Delicious | Iran | 19 | 2  | 4  | 2 | 17 | 4 | 11 | 5  | 5  | 7  | 7 | 7  |



|                |     |                   |                  |            |    |    |    |   |    |   |    |    |    |    |   |    |
|----------------|-----|-------------------|------------------|------------|----|----|----|---|----|---|----|----|----|----|---|----|
| IR04S4.2b      | IR2 | Malus x domestica | Golden Delicious | Iran       | 6  | 9  | 8  | 3 | 6  | 7 | ?  | 6  | 5  | 11 | 4 | 7  |
| IR04S4.20.1    | IR2 | Malus x domestica | Golden Delicious | Iran       | 4  | 2  | ?  | 2 | 2  | 7 | 7  | 5  | 8  | 3  | 6 | 7  |
| IR04S4.21.1    | IR2 | Malus x domestica | Golden Delicious | Iran       | 13 | 2  | 2  | 2 | 2  | 7 | 12 | 8  | 5  | 9  | 5 | 8  |
| IR04S4.22.1    | IR2 | Malus x domestica | Golden Delicious | Iran       | 12 | 8  | 6  | 2 | 6  | 7 | 9  | 2  | 5  | 14 | 4 | 7  |
| IR04S4.3b      | IR2 | Malus x domestica | Golden Delicious | Iran       | 9  | 9  | 6  | 2 | 6  | 7 | 7  | 2  | 2  | 8  | 4 | 7  |
| IR04S4.3.1     | IR2 | Malus x domestica | Golden Delicious | Iran       | 11 | 9  | 14 | 2 | 2  | 7 | 8  | 5  | 5  | 8  | 4 | 3  |
| IR04S4.4b      | IR2 | Malus x domestica | Golden Delicious | Iran       | 9  | ?  | 4  | 2 | 7  | 7 | ?  | 6  | 5  | 14 | 4 | 7  |
| IR04S4.4.1     | IR2 | Malus x domestica | Golden Delicious | Iran       | 6  | 9  | 6  | 2 | 2  | 6 | 8  | 2  | 8  | ?  | 5 | 12 |
| IR04S4.5b      | IR2 | Malus x domestica | Golden Delicious | Iran       | 13 | 9  | 8  | 2 | 2  | 7 | 8  | 5  | 9  | 14 | 4 | 7  |
| IR04S4.6b      | IR2 | Malus x domestica | Golden Delicious | Iran       | 4  | 9  | 12 | 3 | 5  | 7 | 9  | 4  | ?  | 14 | 4 | 7  |
| IR04S4.6.1     | IR2 | Malus x domestica | Golden Delicious | Iran       | 13 | 9  | 15 | 2 | 14 | 6 | 8  | 7  | 5  | 12 | 7 | 8  |
| IR04S4.7b      | IR2 | Malus x domestica | Golden Delicious | Iran       | 9  | 9  | 6  | 2 | 6  | 7 | 7  | 2  | 2  | 8  | 4 | 7  |
| IR04S4.7.1     | IR2 | Malus x domestica | Golden Delicious | Iran       | 11 | 9  | 5  | 2 | 2  | 7 | 8  | 6  | 5  | 5  | 3 | 7  |
| IR04S4.8b      | IR2 | Malus x domestica | Golden Delicious | Iran       | ?  | 9  | 6  | 2 | 2  | 6 | 9  | 2  | 5  | 8  | 5 | 7  |
| IR04S4.8.1     | IR2 | Malus x domestica | Golden Delicious | Iran       | 11 | 2  | 18 | 2 | 6  | 7 | 9  | 7  | 5  | 5  | 4 | 9  |
| IR04S4.9b      | IR2 | Malus x domestica | Golden Delicious | Iran       | 15 | 9  | 20 | 2 | 17 | 7 | 8  | 10 | 9  | 8  | 6 | 8  |
| IR04S4.9b      | IR2 | Malus x domestica | Golden Delicious | Iran       | 12 | 2  | 6  | 2 | 2  | 7 | 9  | 5  | 5  | 3  | 4 | 7  |
| IR04S4.9.1     | IR2 | Malus x domestica | Golden Delicious | Iran       | 12 | ?  | 12 | 2 | 6  | 7 | 9  | 2  | 5  | ?  | 5 | 9  |
| IR04S5P1.1     | IR3 | Malus x domestica | Golden Delicious | Iran       | 16 | 9  | 4  | 2 | 12 | 7 | 13 | 10 | 5  | 11 | 8 | 9  |
| IR04S5P10.1    | IR3 | Malus x domestica | Golden Delicious | Iran       | 6  | 10 | 14 | 3 | 2  | 7 | 9  | 2  | 8  | 9  | 4 | 8  |
| IR04S5P2.1     | IR3 | Malus x domestica | Golden Delicious | Iran       | 6  | 10 | 15 | 3 | 2  | 7 | 7  | 7  | 5  | 9  | 5 | 8  |
| IR04S5P3.1     | IR3 | Malus x domestica | Golden Delicious | Iran       | 12 | 9  | 10 | 2 | 6  | 6 | 10 | 5  | 5  | 9  | 5 | 7  |
| IR04S5P4.1     | IR3 | Malus x domestica | Golden Delicious | Iran       | 6  | 10 | 9  | 2 | 6  | ? | 9  | 5  | 5  | 8  | 4 | ?  |
| IR04S5P5.1     | IR3 | Malus x domestica | Golden Delicious | Iran       | 13 | 9  | 19 | 2 | ?  | 7 | 7  | 12 | 2  | ?  | 6 | 8  |
| IR04S5P7.1     | IR3 | Malus x domestica | Golden Delicious | Iran       | 11 | ?  | ?  | 2 | 8  | 6 | 9  | 6  | 11 | 11 | 4 | 7  |
| IR04S5P8.1     | IR3 | Malus x domestica | Golden Delicious | Iran       | 13 | 9  | 9  | 2 | 9  | 7 | 9  | 5  | 8  | 9  | 4 | 8  |
| IR04S5P9.1     | IR3 | Malus x domestica | Golden Delicious | Iran       | 6  | ?  | 25 | ? | 8  | 7 | 10 | 5  | 6  | 16 | 4 | 9  |
| IR04S5.10      | IR3 | Malus x domestica | Golden Delicious | Iran       | 3  | 2  | 5  | 2 | 2  | 7 | 9  | 2  | 8  | ?  | 4 | 6  |
| IR04S5.12      | IR3 | Malus x domestica | Golden Delicious | Iran       | 12 | 5  | 6  | 3 | 6  | 7 | 8  | 10 | 9  | 8  | 6 | 8  |
| IR04S5.3       | IR3 | Malus x domestica | Golden Delicious | Iran       | 1  | ?  | 1  | 2 | 10 | 7 | ?  | 2  | 12 | 4  | 6 | ?  |
| IR04S5.4       | IR3 | Malus x domestica | Golden Delicious | Iran       | 13 | 9  | 7  | 2 | 2  | 7 | 8  | 18 | 5  | 11 | 5 | 7  |
| IR04S5.5       | IR3 | Malus x domestica | Golden Delicious | Iran       | 6  | 9  | 6  | 2 | 2  | 7 | 8  | 5  | 5  | 10 | 4 | 9  |
| IR04S5.6       | IR3 | Malus x domestica | Golden Delicious | Iran       | 13 | 9  | 8  | 2 | 6  | 7 | 7  | 5  | 7  | 9  | 4 | ?  |
| IR04S5.7       | IR3 | Malus x domestica | Golden Delicious | Iran       | ?  | 9  | 16 | 2 | 17 | 7 | 7  | 9  | 9  | 8  | 4 | ?  |
| IR04S5.8       | IR3 | Malus x domestica | Golden Delicious | Iran       | 13 | 9  | 11 | 2 | 2  | 7 | 8  | 5  | 5  | 9  | 4 | ?  |
| IR04S5.9       | IR3 | Malus x domestica | Golden Delicious | Iran       | ?  | 9  | 9  | 2 | 8  | 7 | 6  | 9  | 5  | 9  | 5 | ?  |
| AZ05QUSTKR1    | AZ  | Malus x domestica | Starkrimson      | Azerbaijan | 13 | 9  | 6  | 2 | 2  | 7 | 8  | 6  | 8  | 10 | ? | 7  |
| AZ05QUSTKR10   | AZ  | Malus x domestica | Starkrimson      | Azerbaijan | 11 | ?  | 5  | 3 | 2  | 6 | 7  | ?  | 8  | ?  | ? | 13 |
| AZ05QUSTKR11   | AZ  | Malus x domestica | Starkrimson      | Azerbaijan | 11 | 9  | 6  | 2 | ?  | 7 | 7  | 7  | 8  | 9  | 4 | 7  |
| AZ05QUSTKR12   | AZ  | Malus x domestica | Starkrimson      | Azerbaijan | 13 | 2  | 12 | 2 | 7  | 7 | ?  | 7  | 5  | ?  | 4 | 7  |
| AZ05QUSTKR13.1 | AZ  | Malus x domestica | Starkrimson      | Azerbaijan | 6  | 9  | ?  | 2 | 17 | 7 | 14 | 5  | 8  | 8  | 6 | 9  |

|                |    |                   |             |            |    |    |    |   |    |   |    |    |    |    |   |    |
|----------------|----|-------------------|-------------|------------|----|----|----|---|----|---|----|----|----|----|---|----|
| AZ05QUSTKR14.1 | AZ | Malus x domestica | Starkrimson | Azerbaijan | 13 | 9  | 13 | 2 | 2  | 7 | ?  | 9  | 8  | 8  | 4 | 7  |
| AZ05QUSTKR15.1 | AZ | Malus x domestica | Starkrimson | Azerbaijan | 6  | 9  | 5  | 2 | 8  | 7 | 11 | 5  | 5  | 10 | 5 | 9  |
| AZ05QUSTKR15.2 | AZ | Malus x domestica | Starkrimson | Azerbaijan | 5  | 9  | 4  | 4 | 9  | 7 | 11 | 5  | 4  | 9  | 6 | 7  |
| AZ05QUSTKR16.2 | AZ | Malus x domestica | Starkrimson | Azerbaijan | 6  | 2  | 6  | 2 | 2  | 9 | 9  | 4  | 5  | 8  | 8 | 7  |
| AZ05QUSTKR17.1 | AZ | Malus x domestica | Starkrimson | Azerbaijan | 6  | 10 | 6  | 2 | 6  | 7 | 6  | 8  | 5  | 11 | 6 | 9  |
| AZ05QUSTKR18.2 | AZ | Malus x domestica | Starkrimson | Azerbaijan | 13 | 9  | 8  | 2 | ?  | 6 | 7  | ?  | 8  | 9  | ? | 8  |
| AZ05QUSTKR2    | AZ | Malus x domestica | Starkrimson | Azerbaijan | 13 | 9  | 16 | 2 | 10 | 6 | 1  | 5  | 5  | ?  | 5 | 8  |
| AZ05QUSTKR3    | AZ | Malus x domestica | Starkrimson | Azerbaijan | 14 | 9  | 13 | 2 | 12 | 7 | 11 | 7  | 5  | 8  | 8 | 11 |
| AZ05QUSTKR4    | AZ | Malus x domestica | Starkrimson | Azerbaijan | 11 | ?  | 7  | 2 | 2  | 7 | 9  | ?  | 15 | 12 | 4 | 8  |
| AZ05QUSTKR5    | AZ | Malus x domestica | Starkrimson | Azerbaijan | 11 | 9  | ?  | 2 | 2  | 7 | 7  | 7  | 5  | ?  | ? | 7  |
| AZ05QUSTKR6    | AZ | Malus x domestica | Starkrimson | Azerbaijan | 13 | 2  | ?  | 2 | 2  | 7 | 12 | 5  | 8  | 10 | 5 | 8  |
| AZ05QUSTKR7    | AZ | Malus x domestica | Starkrimson | Azerbaijan | 12 | 9  | 6  | 3 | 2  | 9 | 10 | ?  | 5  | 2  | 4 | 7  |
| AZ05QUSTKR8    | AZ | Malus x domestica | Starkrimson | Azerbaijan | 12 | 9  | ?  | 2 | 7  | 7 | 10 | 6  | 6  | 11 | 6 | 8  |
| AZ05QUSTKR9    | AZ | Malus x domestica | Starkrimson | Azerbaijan | 13 | 2  | ?  | 2 | 2  | 7 | 8  | ?  | 8  | ?  | 6 | 8  |
| F05BISLS1      | F1 | Malus x domestica | Bisquet     | France     | 14 | 2  | 7  | 2 | 21 | 6 | ?  | 7  | 5  | 9  | 4 | 8  |
| F05BISLS10     | F1 | Malus x domestica | Bisquet     | France     | 10 | 9  | ?  | 2 | 6  | 6 | 20 | 5  | 5  | 8  | 4 | 8  |
| F05BISLS11     | F1 | Malus x domestica | Bisquet     | France     | 10 | 9  | 7  | 2 | 6  | 7 | 7  | 8  | 8  | 13 | 7 | 8  |
| F05BISLS12     | F1 | Malus x domestica | Bisquet     | France     | 14 | 9  | 21 | 2 | 6  | 7 | 12 | 5  | 5  | 12 | 4 | 7  |
| F05BISLS14     | F1 | Malus x domestica | Bisquet     | France     | 12 | 9  | ?  | 2 | 7  | 7 | ?  | 4  | ?  | 12 | 4 | 8  |
| F05BISLS15     | F1 | Malus x domestica | Bisquet     | France     | 14 | 9  | 17 | 2 | 4  | 9 | 9  | 5  | 5  | 8  | 5 | 8  |
| F05BISLS17     | F1 | Malus x domestica | Bisquet     | France     | 11 | 2  | 19 | 3 | 7  | 6 | 11 | 10 | 2  | 10 | 8 | 8  |
| F05BISLS18     | F1 | Malus x domestica | Bisquet     | France     | 12 | 9  | 14 | 2 | 10 | 6 | 7  | 5  | 5  | 11 | 7 | 12 |
| F05BISLS2      | F1 | Malus x domestica | Bisquet     | France     | 11 | 2  | 7  | 2 | 21 | 6 | ?  | ?  | 5  | 9  | 4 | 8  |
| F05BISLS20     | F1 | Malus x domestica | Bisquet     | France     | 11 | 9  | 16 | 2 | 7  | 7 | 7  | 5  | 2  | 8  | 6 | 7  |
| F05BISLS21     | F1 | Malus x domestica | Bisquet     | France     | 13 | 2  | 13 | 2 | 10 | 7 | 8  | 5  | 5  | 8  | 4 | 8  |
| F05BISLS22     | F1 | Malus x domestica | Bisquet     | France     | 12 | 9  | ?  | 2 | 4  | 6 | 9  | 4  | ?  | 8  | 4 | 7  |
| F05BISLS23     | F1 | Malus x domestica | Bisquet     | France     | 13 | 9  | 19 | 2 | 14 | 6 | ?  | ?  | ?  | 10 | 4 | 7  |
| F05BISLS24     | F1 | Malus x domestica | Bisquet     | France     | 13 | 9  | 8  | 3 | 21 | 9 | 10 | ?  | ?  | 11 | 4 | 8  |
| F05BISLS25     | F1 | Malus x domestica | Bisquet     | France     | 13 | 9  | 8  | 3 | 21 | 9 | 10 | 8  | 5  | 11 | 4 | 8  |
| F05BISLS26     | F1 | Malus x domestica | Bisquet     | France     | 21 | 2  | 15 | 2 | 6  | 7 | 11 | 8  | 5  | 9  | 4 | 7  |
| F05BISLS27     | F1 | Malus x domestica | Bisquet     | France     | ?  | 10 | 11 | 2 | ?  | 7 | 10 | 5  | 5  | 9  | 4 | 8  |
| F05BISLS28     | F1 | Malus x domestica | Bisquet     | France     | 3  | 10 | 11 | 2 | ?  | 7 | 10 | 5  | 5  | 9  | 4 | 8  |
| F05BISLS29     | F1 | Malus x domestica | Bisquet     | France     | 3  | 9  | 11 | 3 | ?  | 7 | 11 | 4  | 11 | 8  | 3 | 8  |
| F05BISLS3      | F1 | Malus x domestica | Bisquet     | France     | 12 | 9  | 7  | 2 | 12 | ? | 11 | 6  | 8  | 3  | 4 | 8  |
| F05BISLS30     | F1 | Malus x domestica | Bisquet     | France     | 3  | 9  | 11 | 3 | ?  | 7 | 11 | ?  | ?  | 8  | 4 | 8  |
| F05BISLS32     | F1 | Malus x domestica | Bisquet     | France     | 13 | 10 | 19 | 2 | 10 | 6 | 11 | ?  | ?  | 11 | 6 | 8  |
| F05BISLS33     | F1 | Malus x domestica | Bisquet     | France     | 10 | 9  | 3  | 2 | 6  | 6 | 20 | 6  | 5  | 8  | 4 | 8  |
| F05BISLS34     | F1 | Malus x domestica | Bisquet     | France     | 3  | 9  | 8  | 2 | 10 | 7 | 8  | 10 | 5  | 9  | 7 | 8  |
| F05BISLS35     | F1 | Malus x domestica | Bisquet     | France     | 13 | 9  | 20 | 3 | 7  | 7 | 7  | 11 | 8  | 14 | 6 | 7  |
| F05BISLS36     | F1 | Malus x domestica | Bisquet     | France     | 12 | 9  | ?  | 3 | 13 | 7 | 7  | 7  | 5  | 13 | 6 | 7  |
| F05BISLS37     | F1 | Malus x domestica | Bisquet     | France     | 13 | 10 | 14 | 3 | 6  | 7 | ?  | ?  | 5  | 8  | 4 | 7  |

|             |    |                   |         |        |    |    |    |   |    |   |    |    |    |    |   |    |
|-------------|----|-------------------|---------|--------|----|----|----|---|----|---|----|----|----|----|---|----|
| F05BISLS4   | F1 | Malus x domestica | Bisquet | France | 12 | 2  | 17 | 2 | 4  | 7 | 10 | 5  | 11 | 6  | 6 | 8  |
| F05BISLS5   | F1 | Malus x domestica | Bisquet | France | 12 | 9  | 9  | 3 | 13 | 7 | ?  | 7  | 5  | 13 | 6 | 7  |
| F05BISLS6   | F1 | Malus x domestica | Bisquet | France | 12 | 9  | 15 | 2 | 7  | 6 | ?  | 9  | ?  | 10 | 4 | 8  |
| F05BISLS7   | F1 | Malus x domestica | Bisquet | France | 13 | 10 | 10 | 3 | 6  | 7 | 10 | 5  | 5  | 13 | 4 | 7  |
| F05BISLS8   | F1 | Malus x domestica | Bisquet | France | 13 | 9  | 15 | 2 | 6  | 9 | 7  | ?  | ?  | 9  | 4 | 8  |
| F05BISLS9   | F1 | Malus x domestica | Bisquet | France | 13 | 9  | 15 | 2 | 6  | 9 | 7  | 7  | 2  | 9  | 4 | 8  |
| F05FUJLOR1  | F2 | Malus x domestica | Fuji    | France | 12 | 13 | ?  | 2 | 8  | 9 | 9  | 4  | 8  | 16 | 4 | 2  |
| F05FUJLOR10 | F2 | Malus x domestica | Fuji    | France | 3  | 9  | 20 | 2 | 5  | 7 | 6  | 6  | 5  | 17 | 6 | 7  |
| F05FUJLOR11 | F2 | Malus x domestica | Fuji    | France | 3  | 9  | 6  | 2 | 8  | 7 | 6  | 4  | 5  | 3  | 6 | 8  |
| F05FUJLOR12 | F2 | Malus x domestica | Fuji    | France | 15 | 9  | 29 | 2 | 12 | 7 | 7  | ?  | 11 | 10 | 6 | 12 |
| F05FUJLOR13 | F2 | Malus x domestica | Fuji    | France | 13 | 9  | 23 | 2 | 6  | 7 | 10 | 13 | 2  | 10 | 7 | 8  |
| F05FUJLOR14 | F2 | Malus x domestica | Fuji    | France | 14 | 9  | ?  | 2 | 8  | 9 | 9  | 5  | 11 | 13 | 4 | 8  |
| F05FUJLOR15 | F2 | Malus x domestica | Fuji    | France | 13 | 9  | 11 | ? | 13 | 7 | 10 | 4  | 5  | 9  | 6 | 8  |
| F05FUJLOR16 | F2 | Malus x domestica | Fuji    | France | 9  | 1  | ?  | 2 | 7  | 9 | 10 | 6  | 8  | 11 | 4 | 8  |
| F05FUJLOR17 | F2 | Malus x domestica | Fuji    | France | 13 | 8  | 16 | 2 | 7  | 9 | 10 | 6  | 5  | 5  | 6 | 2  |
| F05FUJLOR18 | F2 | Malus x domestica | Fuji    | France | 12 | 9  | 10 | 2 | 10 | 9 | 10 | 5  | 5  | 9  | 6 | 12 |
| F05FUJLOR19 | F2 | Malus x domestica | Fuji    | France | 6  | 10 | 10 | 2 | 14 | 9 | 10 | 7  | 12 | 1  | 6 | 2  |
| F05FUJLOR2  | F2 | Malus x domestica | Fuji    | France | 12 | 9  | 12 | 2 | 7  | 9 | 10 | 4  | 8  | 9  | 6 | 8  |
| F05FUJLOR20 | F2 | Malus x domestica | Fuji    | France | 13 | 9  | 17 | 3 | 6  | 7 | 10 | 9  | 5  | 5  | 6 | 2  |
| F05FUJLOR21 | F2 | Malus x domestica | Fuji    | France | 16 | 9  | 6  | 2 | 6  | 7 | 6  | 6  | 5  | 9  | 7 | 7  |
| F05FUJLOR22 | F2 | Malus x domestica | Fuji    | France | 13 | 2  | 18 | 2 | 7  | 7 | 8  | 11 | 2  | 3  | 4 | 7  |
| F05FUJLOR23 | F2 | Malus x domestica | Fuji    | France | 5  | 9  | ?  | 3 | 10 | 6 | 9  | 5  | 14 | 18 | 4 | 5  |
| F05FUJLOR24 | F2 | Malus x domestica | Fuji    | France | 13 | 9  | 17 | 2 | 9  | 9 | 9  | 8  | 5  | 7  | 4 | 8  |
| F05FUJLOR25 | F2 | Malus x domestica | Fuji    | France | 3  | 9  | ?  | 2 | 9  | 7 | 9  | 6  | 8  | 10 | 5 | 2  |
| F05FUJLOR26 | F2 | Malus x domestica | Fuji    | France | 14 | 10 | 11 | 2 | 9  | 6 | 14 | 5  | 5  | 3  | 4 | 7  |
| F05FUJLOR27 | F2 | Malus x domestica | Fuji    | France | 17 | 10 | 17 | 3 | 13 | 6 | 10 | 5  | 5  | 19 | 6 | 12 |
| F05FUJLOR28 | F2 | Malus x domestica | Fuji    | France | 14 | 9  | 15 | 2 | 6  | 7 | 20 | 4  | 11 | 3  | 6 | 7  |
| F05FUJLOR3  | F2 | Malus x domestica | Fuji    | France | 3  | 9  | 15 | 2 | 9  | 6 | 10 | ?  | 5  | ?  | 6 | 2  |
| F05FUJLOR30 | F2 | Malus x domestica | Fuji    | France | 12 | 9  | 9  | 3 | 8  | 7 | 10 | 5  | 5  | 10 | 6 | 8  |
| F05FUJLOR4  | F2 | Malus x domestica | Fuji    | France | 13 | 6  | 6  | 2 | 7  | 7 | 17 | 4  | 2  | 3  | 6 | 7  |
| F05FUJLOR5  | F2 | Malus x domestica | Fuji    | France | 15 | 9  | 13 | 2 | ?  | 9 | 8  | 5  | 16 | 9  | 4 | 2  |
| F05FUJLOR6  | F2 | Malus x domestica | Fuji    | France | ?  | 10 | 19 | 6 | 6  | 7 | 11 | 5  | 2  | 10 | 6 | 2  |
| F05FUJLOR7  | F2 | Malus x domestica | Fuji    | France | 18 | 9  | 26 | 2 | 13 | 6 | 14 | 9  | 8  | 17 | 7 | 7  |
| F05FUJLOR8  | F2 | Malus x domestica | Fuji    | France | 12 | 9  | 18 | 2 | 6  | 7 | 10 | 5  | 8  | 10 | 6 | 12 |
| F05FUJLOR9  | F2 | Malus x domestica | Fuji    | France | 11 | 9  | 15 | 2 | 8  | 9 | 12 | 9  | 11 | 9  | 7 | 12 |
| F05GOMU100  | F3 | Malus x domestica | Mutsu   | France | 14 | 9  | 7  | 2 | 19 | 5 | 9  | 5  | 11 | 18 | 6 | 7  |
| F05GOMU101  | F3 | Malus x domestica | Mutsu   | France | 12 | 1  | 12 | 2 | 13 | 5 | 10 | 14 | 5  | 9  | 3 | 7  |
| F05GOMU102  | F3 | Malus x domestica | Mutsu   | France | ?  | 9  | 11 | 2 | 8  | 7 | 11 | 5  | 2  | 10 | 3 | 7  |
| F05GOMU103  | F3 | Malus x domestica | Mutsu   | France | 13 | 13 | 15 | 2 | 7  | 9 | 10 | 5  | 5  | 13 | 6 | 7  |
| F05GOMU104  | F3 | Malus x domestica | Mutsu   | France | 11 | 9  | ?  | 2 | 7  | 9 | 9  | 6  | 8  | 13 | 4 | 8  |
| F05GOMU105  | F3 | Malus x domestica | Mutsu   | France | 13 | 10 | 17 | 2 | 19 | 7 | 10 | 6  | 5  | 13 | 5 | 8  |

|            |    |                   |            |        |    |    |    |   |    |    |    |    |    |    |   |    |
|------------|----|-------------------|------------|--------|----|----|----|---|----|----|----|----|----|----|---|----|
| F05GOMU106 | F3 | Malus x domestica | Mutsu      | France | 13 | 10 | 2  | 2 | 10 | 7  | 11 | 5  | 5  | 13 | 4 | 7  |
| F05GOMU107 | F3 | Malus x domestica | Mutsu      | France | 12 | 6  | 14 | 2 | 13 | 7  | 11 | 5  | 8  | 22 | 7 | 7  |
| F05GOMU108 | F3 | Malus x domestica | Mutsu      | France | 13 | 10 | 16 | 2 | 6  | 7  | 9  | 6  | 5  | 9  | 4 | 8  |
| F05GOMU109 | F3 | Malus x domestica | Mutsu      | France | 9  | 2  | 3  | 2 | 8  | 7  | 9  | 6  | 5  | 13 | 4 | 7  |
| F05GOMU110 | F3 | Malus x domestica | Mutsu      | France | 25 | 13 | 5  | 3 | 13 | 9  | ?  | 11 | 5  | 17 | 6 | 7  |
| F05GOMU111 | F3 | Malus x domestica | Mutsu      | France | 12 | 6  | 5  | 2 | 10 | 5  | 9  | 6  | 2  | 9  | 5 | 7  |
| F05GOMU112 | F3 | Malus x domestica | Mutsu      | France | 5  | 9  | 17 | 2 | 7  | 5  | 9  | 8  | 11 | 9  | 5 | 8  |
| F05GOMU113 | F3 | Malus x domestica | Mutsu      | France | 12 | 9  | 15 | 2 | 7  | 6  | 14 | 8  | 8  | 14 | 4 | 8  |
| F05GOMU114 | F3 | Malus x domestica | Mutsu      | France | 9  | 9  | 18 | 2 | 5  | 10 | 9  | 6  | 8  | 3  | 4 | 7  |
| F05GOMU115 | F3 | Malus x domestica | Mutsu      | France | 14 | 9  | 7  | 2 | 10 | 6  | ?  | 8  | 8  | 3  | 4 | 7  |
| F05GOMU116 | F3 | Malus x domestica | Mutsu      | France | ?  | 6  | 17 | 2 | 6  | 5  | 7  | 8  | 8  | 9  | 5 | 12 |
| F05GOMU117 | F3 | Malus x domestica | Mutsu      | France | 16 | 6  | 16 | 2 | 7  | 7  | 10 | 8  | 2  | 13 | 6 | 9  |
| F05GOMU118 | F3 | Malus x domestica | Mutsu      | France | 16 | 6  | 16 | 2 | 7  | 7  | 10 | 1  | 2  | 13 | 6 | 9  |
| F05GOMU119 | F3 | Malus x domestica | Mutsu      | France | 11 | 9  | 15 | 2 | 19 | 9  | 7  | 5  | 5  | 8  | 5 | 8  |
| F05GOMU120 | F3 | Malus x domestica | Mutsu      | France | 3  | 9  | 15 | 2 | 6  | 3  | 11 | 5  | 5  | 9  | 7 | 12 |
| F05GOMU121 | F3 | Malus x domestica | Mutsu      | France | 3  | 2  | 17 | 2 | 7  | 6  | 11 | 6  | 5  | 13 | 6 | 7  |
| F05GOMU122 | F3 | Malus x domestica | Mutsu      | France | 15 | 9  | 15 | 4 | 13 | 5  | 8  | 8  | 8  | 9  | 5 | 8  |
| F05GOMU93  | F3 | Malus x domestica | Mutsu      | France | 12 | 10 | 17 | 2 | 7  | 7  | 12 | 6  | 8  | 10 | 4 | 12 |
| F05GOMU94  | F3 | Malus x domestica | Mutsu      | France | 12 | 7  | 18 | 2 | 12 | 7  | 14 | 14 | 2  | 11 | 4 | 8  |
| F05GOMU95  | F3 | Malus x domestica | Mutsu      | France | 12 | 9  | 9  | 2 | 6  | 7  | 7  | 6  | 2  | 10 | 5 | 12 |
| F05GOMU96  | F3 | Malus x domestica | Mutsu      | France | ?  | 9  | 4  | 2 | 7  | 6  | 11 | 4  | 8  | 3  | 5 | 8  |
| F05GOMU97  | F3 | Malus x domestica | Mutsu      | France | 13 | 10 | 17 | 2 | 7  | 9  | 9  | 12 | 5  | 9  | 6 | 7  |
| F05GOMU98  | F3 | Malus x domestica | Mutsu      | France | 12 | 9  | 14 | 2 | 10 | 6  | 11 | 7  | 2  | 15 | 4 | 8  |
| F05GOMU99  | F3 | Malus x domestica | Mutsu      | France | 13 | 9  | 17 | 2 | 6  | 5  | 7  | 6  | 5  | 9  | 6 | 7  |
| F05LHGA46  | F4 | Malus x domestica | Royal Gala | France | 12 | 9  | 11 | 2 | 8  | 6  | 7  | 11 | 8  | 9  | 6 | 8  |
| F05LHGA47  | F4 | Malus x domestica | Royal Gala | France | 11 | 10 | 14 | 2 | 8  | 9  | 7  | 5  | 16 | 8  | 8 | 7  |
| F05LHGA48  | F4 | Malus x domestica | Royal Gala | France | 10 | 10 | 8  | 2 | ?  | 9  | 9  | 5  | 5  | 9  | 4 | 7  |
| F05LHGA49  | F4 | Malus x domestica | Royal Gala | France | 3  | 2  | 11 | 3 | 10 | 6  | 7  | 8  | 5  | 12 | 4 | 7  |
| F05LHGA50  | F4 | Malus x domestica | Royal Gala | France | 12 | 10 | 11 | 2 | 10 | 7  | 10 | 5  | 5  | 8  | 4 | 8  |
| F05LHGA51  | F4 | Malus x domestica | Royal Gala | France | 13 | 9  | 8  | 3 | 7  | 7  | 9  | 11 | 2  | 10 | 4 | 8  |
| F05LHGA52  | F4 | Malus x domestica | Royal Gala | France | 14 | 9  | 14 | 2 | 6  | 9  | 9  | 4  | 5  | 14 | 6 | 8  |
| F05LHGA53  | F4 | Malus x domestica | Royal Gala | France | 17 | 1  | 14 | 2 | 4  | 6  | 9  | 7  | 2  | 12 | 6 | 8  |
| F05LHGA54  | F4 | Malus x domestica | Royal Gala | France | ?  | 12 | 12 | 2 | 4  | 7  | 9  | 5  | 5  | 8  | 6 | 8  |
| F05LHGA55  | F4 | Malus x domestica | Royal Gala | France | 12 | 9  | 3  | 2 | 8  | 6  | 9  | 9  | 5  | 9  | 7 | 8  |
| F05LHGA56  | F4 | Malus x domestica | Royal Gala | France | 12 | 12 | 11 | 2 | 11 | 7  | 8  | 6  | 8  | 3  | 4 | 8  |
| F05LHGA57  | F4 | Malus x domestica | Royal Gala | France | 14 | 10 | 6  | 2 | 6  | 6  | 9  | 7  | 8  | 5  | 4 | 8  |
| F05LHGA58  | F4 | Malus x domestica | Royal Gala | France | 15 | 9  | 23 | 2 | 21 | 7  | 9  | 6  | 2  | 9  | 6 | 8  |
| F05LHGA59  | F4 | Malus x domestica | Royal Gala | France | 12 | 2  | 14 | 2 | 14 | 7  | 8  | 8  | 7  | 10 | 4 | 7  |
| F05LHGA60  | F4 | Malus x domestica | Royal Gala | France | 14 | 9  | ?  | 2 | 7  | 7  | 9  | 7  | 8  | 15 | 7 | 8  |
| F05LHGA61  | F4 | Malus x domestica | Royal Gala | France | 10 | 9  | 14 | 2 | 8  | 6  | 11 | 5  | 5  | 11 | 4 | 7  |
| F05LHGA62  | F4 | Malus x domestica | Royal Gala | France | 12 | 9  | 8  | 2 | 7  | 9  | 11 | 7  | 5  | 13 | 6 | 8  |

|             |    |                   |            |        |    |    |    |   |    |   |    |    |    |    |   |    |
|-------------|----|-------------------|------------|--------|----|----|----|---|----|---|----|----|----|----|---|----|
| F05LHGA63   | F4 | Malus x domestica | Royal Gala | France | 10 | 9  | 14 | 2 | 7  | 7 | 10 | 4  | 8  | ?  | 6 | 8  |
| F05LHGA64   | F4 | Malus x domestica | Royal Gala | France | 12 | 10 | 14 | 2 | 21 | 6 | 10 | 9  | 5  | 9  | 4 | 8  |
| F05LHGA65   | F4 | Malus x domestica | Royal Gala | France | 13 | 11 | ?  | 2 | 8  | 7 | 9  | 8  | 5  | 3  | 6 | 7  |
| F05LHGA66   | F4 | Malus x domestica | Royal Gala | France | 11 | 9  | 12 | 2 | 7  | 6 | 7  | 4  | 5  | 8  | 7 | 8  |
| F05LHGA67   | F4 | Malus x domestica | Royal Gala | France | 3  | 9  | 9  | 2 | 7  | 5 | 9  | 7  | 8  | 10 | 5 | 8  |
| F05LHGA68   | F4 | Malus x domestica | Royal Gala | France | 13 | 2  | 8  | 3 | 6  | 7 | 9  | 4  | 11 | 11 | 5 | 7  |
| F05LHGA69   | F4 | Malus x domestica | Royal Gala | France | 12 | 9  | 4  | 2 | ?  | 7 | 8  | 8  | 11 | 9  | 5 | 8  |
| F05LHGA70   | F4 | Malus x domestica | Royal Gala | France | 12 | 2  | 18 | 2 | 7  | 7 | 10 | 5  | 1  | 10 | 6 | 8  |
| F05LHGA71   | F4 | Malus x domestica | Royal Gala | France | 12 | 11 | 4  | 2 | 8  | 6 | 10 | 5  | 11 | 12 | 4 | 8  |
| F05LHGA72   | F4 | Malus x domestica | Royal Gala | France | 12 | 9  | 14 | 3 | 6  | 7 | 8  | 9  | 8  | 4  | 4 | 2  |
| F05LHGA73   | F4 | Malus x domestica | Royal Gala | France | 10 | 9  | 16 | ? | 8  | 7 | 8  | 5  | 8  | 8  | 5 | 8  |
| F05LHGA74   | F4 | Malus x domestica | Royal Gala | France | 11 | 10 | 16 | 2 | 10 | 7 | 9  | 9  | 5  | 9  | 1 | 2  |
| F05LHGA75   | F4 | Malus x domestica | Royal Gala | France | 13 | 10 | 19 | 2 | 13 | 5 | 9  | 6  | 5  | 9  | 5 | 8  |
| F05LHJO76   | F5 | Malus x domestica | Jonagold   | France | 12 | 9  | 4  | 2 | 7  | 5 | ?  | 4  | 8  | 15 | 6 | 8  |
| F05LHJO77   | F5 | Malus x domestica | Jonagold   | France | 11 | 2  | 15 | 2 | 10 | 7 | 9  | 8  | 5  | 13 | 4 | 8  |
| F05LHJO78   | F5 | Malus x domestica | Jonagold   | France | ?  | 9  | 16 | 2 | 13 | 5 | 11 | 7  | 5  | 15 | 4 | 7  |
| F05LHJO79   | F5 | Malus x domestica | Jonagold   | France | 12 | 9  | 14 | 2 | 11 | 5 | ?  | ?  | 2  | 3  | ? | 8  |
| F05LHJO80   | F5 | Malus x domestica | Jonagold   | France | 12 | 9  | 11 | 2 | 12 | 5 | 8  | 4  | ?  | 10 | 4 | 7  |
| F05LHJO81   | F5 | Malus x domestica | Jonagold   | France | 15 | 2  | 9  | 2 | 12 | 6 | 9  | 6  | 5  | 9  | 4 | 8  |
| F05LHJO82   | F5 | Malus x domestica | Jonagold   | France | 12 | 9  | 6  | 3 | 12 | 6 | 9  | 5  | 5  | 8  | 5 | 9  |
| F05LHJO83   | F5 | Malus x domestica | Jonagold   | France | 11 | 9  | 18 | 2 | 9  | 5 | 9  | 5  | 5  | 16 | 6 | 7  |
| F05LHJO84   | F5 | Malus x domestica | Jonagold   | France | 13 | 10 | 17 | 2 | 7  | 6 | 10 | 7  | 8  | 9  | 6 | 7  |
| F05LHJO85   | F5 | Malus x domestica | Jonagold   | France | 21 | 9  | 7  | 2 | 9  | 6 | 8  | 5  | 5  | 10 | 1 | 8  |
| F05LHJO86   | F5 | Malus x domestica | Jonagold   | France | 21 | 9  | 8  | 2 | 8  | 9 | ?  | 8  | 5  | 3  | 7 | 7  |
| F05LHJO87   | F5 | Malus x domestica | Jonagold   | France | 12 | 9  | ?  | 2 | 11 | 5 | ?  | 6  | 5  | 12 | 4 | ?  |
| F05LHJO88   | F5 | Malus x domestica | Jonagold   | France | 12 | 10 | 15 | 2 | 7  | 9 | 10 | 8  | 5  | 9  | 6 | 8  |
| F05LHJO89   | F5 | Malus x domestica | Jonagold   | France | 3  | 9  | 22 | 2 | 7  | 6 | 9  | 5  | 5  | 5  | 4 | 8  |
| F05LHJO90   | F5 | Malus x domestica | Jonagold   | France | 12 | 9  | ?  | 2 | 13 | 5 | 7  | 8  | 5  | 9  | 4 | 8  |
| F05LHJO91   | F5 | Malus x domestica | Jonagold   | France | 14 | 2  | 21 | 2 | 10 | 7 | 9  | 6  | 5  | 9  | 4 | 8  |
| F05LHJO92   | F5 | Malus x domestica | Jonagold   | France | 23 | 10 | 4  | 2 | 13 | 5 | ?  | 6  | 5  | 10 | 4 | 8  |
| F05SMOGOT1  | F6 | Malus x domestica | Smoothee   | France | 18 | 9  | 7  | 2 | 4  | 9 | ?  | 6  | 5  | 8  | 4 | 2  |
| F05SMOGOT10 | F6 | Malus x domestica | Smoothee   | France | 12 | 9  | 17 | 2 | 9  | 7 | 9  | 7  | 8  | 9  | 4 | 2  |
| F05SMOGOT11 | F6 | Malus x domestica | Smoothee   | France | 13 | 9  | 16 | 2 | 6  | 7 | 9  | 8  | 5  | 10 | 6 | 7  |
| F05SMOGOT12 | F6 | Malus x domestica | Smoothee   | France | 15 | 10 | 5  | 2 | 4  | 7 | ?  | 5  | 8  | 8  | 5 | 7  |
| F05SMOGOT13 | F6 | Malus x domestica | Smoothee   | France | ?  | ?  | 20 | ? | 7  | 6 | 9  | 11 | 11 | 10 | 6 | 8  |
| F05SMOGOT14 | F6 | Malus x domestica | Smoothee   | France | 14 | 9  | 12 | 2 | 13 | 7 | 8  | 4  | 8  | 12 | 4 | 7  |
| F05SMOGOT15 | F6 | Malus x domestica | Smoothee   | France | 3  | 9  | 6  | 2 | 6  | 7 | 9  | 6  | 8  | 13 | 4 | 8  |
| F05SMOGOT17 | F6 | Malus x domestica | Smoothee   | France | 8  | 9  | 17 | 2 | 10 | 9 | 11 | 6  | 8  | 10 | 4 | 12 |
| F05SMOGOT18 | F6 | Malus x domestica | Smoothee   | France | 3  | 10 | 17 | 2 | ?  | 6 | 11 | 5  | 8  | 14 | 7 | 4  |
| F05SMOGOT19 | F6 | Malus x domestica | Smoothee   | France | 22 | 9  | 5  | 2 | 19 | 7 | 10 | 6  | 12 | 13 | 6 | 8  |
| F05SMOGOT20 | F6 | Malus x domestica | Smoothee   | France | 13 | 9  | 2  | 2 | 8  | 9 | 9  | 9  | 2  | 13 | 4 | 7  |

|            |    |                   |                  |        |    |    |    |   |    |   |    |    |    |    |    |   |
|------------|----|-------------------|------------------|--------|----|----|----|---|----|---|----|----|----|----|----|---|
| F05SMOGOT3 | F6 | Malus x domestica | Smoothee         | France | 12 | 9  | 12 | 2 | 10 | 7 | 8  | 12 | 2  | 11 | 4  | ? |
| F05SMOGOT4 | F6 | Malus x domestica | Smoothee         | France | 3  | 9  | 2  | 2 | 6  | 7 | 9  | 6  | 2  | 15 | 5  | 8 |
| F05SMOGOT5 | F6 | Malus x domestica | Smoothee         | France | 12 | 10 | 23 | 2 | 10 | 7 | 7  | 7  | 2  | 12 | 4  | 7 |
| F05SMOGOT6 | F6 | Malus x domestica | Smoothee         | France | 12 | 9  | 6  | 2 | 10 | 7 | 9  | 8  | 5  | 5  | 4  | 8 |
| F05SMOGOT7 | F6 | Malus x domestica | Smoothee         | France | 3  | 9  | 17 | 2 | 7  | 7 | ?  | 5  | 8  | 8  | 7  | 7 |
| F05SMOGOT8 | F6 | Malus x domestica | Smoothee         | France | ?  | ?  | 5  | 2 | 13 | 9 | 11 | 7  | 5  | 18 | 4  | ? |
| F05SMOGOT9 | F6 | Malus x domestica | Smoothee         | France | 3  | 9  | 15 | 2 | ?  | 6 | ?  | 6  | 2  | 7  | 6  | 9 |
| F05VAGA1   | F7 | Malus x domestica | Royal Gala       | France | 3  | 10 | 18 | 2 | 7  | 7 | 10 | 4  | 1  | 9  | 6  | 8 |
| F05VAGA10  | F7 | Malus x domestica | Royal Gala       | France | 11 | 9  | 18 | 2 | 4  | 7 | 10 | 4  | 2  | 11 | 7  | 8 |
| F05VAGA11  | F7 | Malus x domestica | Royal Gala       | France | 13 | 9  | 18 | 2 | 6  | 7 | 10 | 4  | 2  | 3  | 4  | 8 |
| F05VAGA12  | F7 | Malus x domestica | Royal Gala       | France | 12 | 9  | 5  | 3 | 4  | 7 | 9  | 6  | 8  | 9  | 4  | 8 |
| F05VAGA13  | F7 | Malus x domestica | Royal Gala       | France | 12 | 9  | 19 | 2 | 7  | 7 | 10 | 5  | 5  | 10 | 5  | 8 |
| F05VAGA14  | F7 | Malus x domestica | Royal Gala       | France | 12 | 9  | 15 | 2 | 8  | 6 | 12 | 7  | 8  | 11 | 4  | 8 |
| F05VAGA15  | F7 | Malus x domestica | Royal Gala       | France | 3  | 10 | 4  | 2 | 6  | 7 | 8  | 8  | 5  | 9  | 4  | 8 |
| F05VAGA16  | F7 | Malus x domestica | Royal Gala       | France | 12 | 9  | 4  | 3 | 7  | 7 | 9  | 9  | 2  | 10 | 9  | 8 |
| F05VAGA17  | F7 | Malus x domestica | Royal Gala       | France | 3  | 10 | 18 | 2 | 4  | 7 | 10 | 7  | 2  | 10 | 7  | 8 |
| F05VAGA18  | F7 | Malus x domestica | Royal Gala       | France | ?  | 2  | ?  | 2 | 6  | 7 | 9  | 5  | 8  | ?  | 4  | 9 |
| F05VAGA19  | F7 | Malus x domestica | Royal Gala       | France | ?  | 9  | ?  | 2 | 7  | 7 | 7  | 7  | 5  | 10 | 4  | 8 |
| F05VAGA20  | F7 | Malus x domestica | Royal Gala       | France | ?  | 9  | 18 | 2 | 7  | 7 | 13 | 7  | 5  | 10 | 4  | 8 |
| F05VAGA22  | F7 | Malus x domestica | Royal Gala       | France | 12 | 10 | 13 | 2 | 7  | 7 | 14 | 4  | 2  | 10 | 4  | 8 |
| F05VAGA3   | F7 | Malus x domestica | Royal Gala       | France | 11 | 9  | 13 | 2 | 11 | 6 | 9  | 4  | 11 | 11 | 6  | 8 |
| F05VAGA4   | F7 | Malus x domestica | Royal Gala       | France | 10 | 9  | 7  | 3 | 11 | 7 | 8  | 8  | 2  | 9  | 7  | 8 |
| F05VAGA5   | F7 | Malus x domestica | Royal Gala       | France | 3  | 10 | 10 | 2 | 4  | 7 | 14 | 7  | 2  | 10 | 7  | 7 |
| F05VAGA7   | F7 | Malus x domestica | Royal Gala       | France | 12 | 9  | 13 | 2 | 10 | 7 | 7  | 4  | 8  | 10 | 6  | 8 |
| F05VAGA8   | F7 | Malus x domestica | Royal Gala       | France | 12 | 10 | 16 | 3 | 8  | 9 | 8  | 8  | 8  | 12 | 4  | 8 |
| F05VAGA9   | F7 | Malus x domestica | Royal Gala       | France | 3  | 10 | 13 | 2 | 4  | 7 | 8  | 4  | 8  | 3  | 4  | 8 |
| F05VAGO23  | F8 | Malus x domestica | Golden Delicious | France | 13 | 9  | 13 | 2 | 7  | 7 | 10 | 11 | 2  | 10 | 7  | 8 |
| F05VAGO24  | F8 | Malus x domestica | Golden Delicious | France | 3  | 9  | 13 | 2 | 7  | 7 | 8  | 4  | 2  | 10 | 4  | 8 |
| F05VAGO25  | F8 | Malus x domestica | Golden Delicious | France | 12 | 9  | 18 | 2 | 4  | 7 | 10 | 7  | 2  | 10 | 7  | 8 |
| F05VAGO26  | F8 | Malus x domestica | Golden Delicious | France | 3  | 10 | 18 | 2 | 7  | 7 | 9  | 7  | 8  | 9  | 6  | 8 |
| F05VAGO27  | F8 | Malus x domestica | Golden Delicious | France | 3  | 10 | 18 | 2 | 4  | 7 | 10 | 8  | 2  | 10 | 4  | 8 |
| F05VAGO28  | F8 | Malus x domestica | Golden Delicious | France | 15 | 10 | 13 | 2 | 8  | 6 | 8  | 5  | 2  | 10 | 4  | 8 |
| F05VAGO29  | F8 | Malus x domestica | Golden Delicious | France | 3  | 9  | 18 | 3 | 6  | 7 | 8  | 5  | 8  | 10 | 6  | 8 |
| F05VAGO30  | F8 | Malus x domestica | Golden Delicious | France | 3  | 9  | 18 | 2 | 8  | 6 | 10 | 5  | 8  | 5  | 6  | 8 |
| F05VAGO31  | F8 | Malus x domestica | Golden Delicious | France | 3  | 10 | 18 | 2 | 7  | 7 | 8  | 4  | 2  | 9  | 6  | 8 |
| F05VAGO32  | F8 | Malus x domestica | Golden Delicious | France | 3  | 10 | 18 | 2 | 7  | 6 | 8  | 4  | 2  | 9  | 10 | 8 |
| F05VAGO33  | F8 | Malus x domestica | Golden Delicious | France | 5  | 10 | 7  | 2 | 7  | 7 | 8  | 5  | 5  | 4  | 4  | 8 |
| F05VAGO34  | F8 | Malus x domestica | Golden Delicious | France | 13 | 9  | 13 | 2 | 7  | 7 | 10 | 4  | 2  | 10 | 7  | 8 |
| F05VAGO35  | F8 | Malus x domestica | Golden Delicious | France | 3  | 9  | 7  | 2 | 6  | 7 | 10 | 7  | 8  | 9  | 5  | 9 |
| F05VAGO36  | F8 | Malus x domestica | Golden Delicious | France | 13 | 9  | 5  | 3 | 4  | 7 | 9  | 5  | 5  | 9  | 6  | 8 |
| F05VAGO37  | F8 | Malus x domestica | Golden Delicious | France | 16 | 9  | 18 | 2 | 10 | 6 | 10 | 8  | 8  | 9  | 6  | 8 |

|              |     |                   |                  |        |    |    |    |   |    |   |    |   |   |    |    |    |
|--------------|-----|-------------------|------------------|--------|----|----|----|---|----|---|----|---|---|----|----|----|
| F05VAGO38    | F8  | Malus x domestica | Golden Delicious | France | 12 | 9  | 7  | 2 | 6  | 6 | 8  | 8 | 8 | 9  | 6  | 8  |
| F05VAGO39    | F8  | Malus x domestica | Golden Delicious | France | 3  | 10 | 5  | 3 | 7  | 7 | 9  | 4 | 2 | 9  | 6  | 8  |
| F05VAGO40    | F8  | Malus x domestica | Golden Delicious | France | 6  | 10 | 18 | 2 | 8  | 7 | 10 | 4 | 5 | 9  | 4  | 8  |
| F05VAGO41    | F8  | Malus x domestica | Golden Delicious | France | 14 | 9  | 13 | 2 | 6  | 7 | 8  | 8 | 8 | 10 | 6  | 12 |
| F05VAGO42    | F8  | Malus x domestica | Golden Delicious | France | 3  | 10 | 14 | 2 | 10 | 9 | 8  | 4 | 1 | 9  | 6  | 8  |
| F05VAGO43    | F8  | Malus x domestica | Golden Delicious | France | 12 | 2  | 18 | 2 | 10 | 7 | 8  | 8 | 8 | 9  | 6  | 8  |
| F05VAGO44    | F8  | Malus x domestica | Golden Delicious | France | 6  | 10 | 13 | 2 | 4  | 7 | 10 | 5 | 5 | 5  | 6  | 8  |
| F05VAGO45    | F8  | Malus x domestica | Golden Delicious | France | ?  | 9  | 15 | 3 | 5  | 7 | 8  | 5 | 8 | 10 | 6  | 8  |
| SE05ALGA1    | SE  | Malus x domestica | Royal Gala       | Sweden | 12 | 9  | 15 | 2 | 10 | 6 | 16 | 7 | 8 | 9  | 6  | 7  |
| SE05ALGA1    | SE  | Malus x domestica | Royal Gala       | Sweden | 12 | 9  | 7  | 2 | 11 | 6 | ?  | 6 | 5 | 3  | 6  | 9  |
| SE05ALGA11.2 | SE  | Malus x domestica | Royal Gala       | Sweden | 3  | 9  | 5  | 3 | 13 | 7 | 9  | 5 | 8 | 9  | 10 | 9  |
| SE05ALGA12   | SE  | Malus x domestica | Royal Gala       | Sweden | 12 | 9  | 17 | 3 | 11 | 7 | 10 | 6 | 5 | 10 | 4  | 7  |
| SE05ALGA13   | SE  | Malus x domestica | Royal Gala       | Sweden | 12 | 9  | 17 | 2 | 6  | 7 | 10 | 6 | 8 | 9  | 4  | 8  |
| SE05ALGA14   | SE  | Malus x domestica | Royal Gala       | Sweden | 11 | 10 | 17 | 3 | ?  | 6 | 8  | ? | 8 | 10 | 5  | 7  |
| SE05ALGA15   | SE  | Malus x domestica | Royal Gala       | Sweden | 12 | 9  | 9  | 2 | 7  | 7 | 9  | 8 | 5 | 8  | 5  | 7  |
| SE05ALGA16   | SE  | Malus x domestica | Royal Gala       | Sweden | 12 | 9  | ?  | 2 | 7  | 7 | 8  | 7 | 5 | 10 | 6  | 8  |
| SE05ALGA17   | SE  | Malus x domestica | Royal Gala       | Sweden | 12 | 9  | ?  | 2 | 7  | 7 | 10 | 5 | 5 | 9  | 6  | 7  |
| SE05ALGA18   | SE  | Malus x domestica | Royal Gala       | Sweden | 13 | 9  | 17 | 3 | 7  | 7 | 12 | 8 | 5 | 5  | 4  | 8  |
| SE05ALGA19   | SE  | Malus x domestica | Royal Gala       | Sweden | 4  | 9  | 16 | 2 | 7  | 7 | 12 | 5 | 5 | 10 | 4  | ?  |
| SE05ALGA2    | SE  | Malus x domestica | Royal Gala       | Sweden | 11 | 9  | 7  | 2 | 7  | 4 | 9  | 6 | 5 | 17 | 4  | 8  |
| SE05ALGA2    | SE  | Malus x domestica | Royal Gala       | Sweden | 11 | 11 | 7  | 2 | 8  | 7 | ?  | 6 | 2 | 8  | 6  | 8  |
| SE05ALGA2.2  | SE  | Malus x domestica | Royal Gala       | Sweden | 12 | 9  | ?  | 2 | 6  | 7 | 9  | 5 | 5 | 3  | 8  | 7  |
| SE05ALGA21   | SE  | Malus x domestica | Royal Gala       | Sweden | 3  | 6  | 17 | 3 | 7  | 7 | 9  | 7 | 2 | ?  | 6  | 7  |
| SE05ALGA22   | SE  | Malus x domestica | Royal Gala       | Sweden | 11 | 9  | 15 | 2 | 7  | 9 | 10 | 8 | 5 | ?  | 4  | 7  |
| SE05ALGA23   | SE  | Malus x domestica | Royal Gala       | Sweden | 12 | 10 | 17 | 2 | 14 | 2 | 9  | 6 | 8 | 3  | 6  | 7  |
| SE05ALGA3    | SE  | Malus x domestica | Royal Gala       | Sweden | 7  | 9  | 17 | 2 | 7  | 6 | 8  | 4 | 8 | 5  | 6  | 8  |
| SE05ALGA3    | SE  | Malus x domestica | Royal Gala       | Sweden | 18 | 10 | 7  | 3 | 14 | 6 | 11 | 6 | 8 | 15 | 6  | 7  |
| SE05ALGA4    | SE  | Malus x domestica | Royal Gala       | Sweden | 12 | 9  | ?  | 2 | 11 | 6 | 9  | 6 | 5 | 3  | 6  | 9  |
| SE05ALGA4    | SE  | Malus x domestica | Royal Gala       | Sweden | 12 | 17 | ?  | 2 | 7  | 6 | ?  | 7 | 5 | 9  | 6  | 7  |
| SE05ALGA5    | SE  | Malus x domestica | Royal Gala       | Sweden | 11 | 11 | 7  | 2 | 8  | 7 | 9  | 6 | 8 | 9  | 6  | 8  |
| SE05ALGA5    | SE  | Malus x domestica | Royal Gala       | Sweden | 13 | 10 | 21 | 3 | 7  | 6 | ?  | 2 | 2 | 10 | 6  | 7  |
| SE05ALGA6    | SE  | Malus x domestica | Royal Gala       | Sweden | 3  | 9  | 15 | 2 | ?  | 7 | ?  | 8 | 8 | 10 | 8  | 8  |
| SE05ALGA7    | SE  | Malus x domestica | Royal Gala       | Sweden | 12 | 9  | ?  | 2 | 7  | 7 | 9  | 7 | 5 | 9  | 4  | 7  |
| SE05ALGA8    | SE  | Malus x domestica | Royal Gala       | Sweden | 13 | 9  | 13 | 2 | 14 | 6 | 8  | 2 | 8 | 11 | 4  | 7  |
| SP05GA24     | SP1 | Malus x domestica | Royal Gala       | Spain  | 3  | 9  | 22 | 2 | 8  | 6 | 10 | 6 | 5 | 9  | 6  | 7  |
| SP05GA33     | SP1 | Malus x domestica | Royal Gala       | Spain  | 14 | 10 | 18 | 2 | 7  | 6 | 8  | 9 | 8 | 10 | 4  | 8  |
| SP05GA34     | SP1 | Malus x domestica | Royal Gala       | Spain  | 13 | 9  | 15 | 2 | 9  | 9 | 9  | 7 | 5 | 2  | 4  | 8  |
| SP05GA35     | SP1 | Malus x domestica | Royal Gala       | Spain  | 15 | 10 | 9  | 2 | 7  | 9 | 12 | 8 | 5 | 11 | 4  | 8  |
| SP05GA37     | SP1 | Malus x domestica | Royal Gala       | Spain  | 14 | 9  | 7  | 2 | ?  | 6 | 10 | 6 | 5 | 3  | 6  | 8  |
| SP05GA38     | SP1 | Malus x domestica | Royal Gala       | Spain  | 11 | 10 | 17 | 2 | 11 | 7 | 6  | 5 | 8 | 9  | 5  | 7  |
| SP05GA39     | SP1 | Malus x domestica | Royal Gala       | Spain  | 13 | 10 | 9  | 2 | 6  | 6 | 8  | 5 | 5 | 9  | 8  | 8  |

|            |     |                   |                  |       |    |    |    |   |    |   |    |    |    |    |   |   |
|------------|-----|-------------------|------------------|-------|----|----|----|---|----|---|----|----|----|----|---|---|
| SP05GA40   | SP1 | Malus x domestica | Royal Gala       | Spain | 12 | 10 | ?  | 2 | 12 | 7 | 8  | 5  | 5  | 11 | 4 | 8 |
| SP05GA41   | SP1 | Malus x domestica | Royal Gala       | Spain | 16 | 10 | 14 | 2 | 18 | 6 | 8  | 5  | 5  | 8  | 7 | 8 |
| SP05GA1    | SP1 | Malus x domestica | Royal Gala       | Spain | 24 | 9  | ?  | 2 | ?  | 7 | 7  | 5  | 5  | 10 | 4 | ? |
| SP05GA11   | SP1 | Malus x domestica | Royal Gala       | Spain | 3  | 9  | 22 | 2 | 8  | 6 | 10 | 6  | 5  | 9  | 6 | 7 |
| SP05GA12   | SP1 | Malus x domestica | Royal Gala       | Spain | 16 | 9  | ?  | 2 | 10 | 6 | 6  | 8  | 5  | 10 | 4 | 7 |
| SP05GA13   | SP1 | Malus x domestica | Royal Gala       | Spain | 13 | ?  | 8  | 2 | 9  | 6 | 10 | 8  | 5  | 4  | 4 | 7 |
| SP05GA14   | SP1 | Malus x domestica | Royal Gala       | Spain | 12 | 10 | 17 | 2 | 7  | 6 | 10 | 10 | 11 | 14 | 4 | 8 |
| SP05GA15   | SP1 | Malus x domestica | Royal Gala       | Spain | 13 | 10 | 8  | 2 | 9  | 7 | 7  | 5  | 8  | 16 | 4 | 8 |
| SP05GA17   | SP1 | Malus x domestica | Royal Gala       | Spain | 13 | 10 | 9  | 2 | 8  | 6 | 6  | 5  | 5  | 9  | 8 | 8 |
| SP05GA18   | SP1 | Malus x domestica | Royal Gala       | Spain | 16 | 10 | 14 | 2 | 6  | 6 | 8  | 5  | 5  | 8  | 6 | ? |
| SP05GA19   | SP1 | Malus x domestica | Royal Gala       | Spain | ?  | 9  | 18 | 2 | 6  | 7 | ?  | 8  | 5  | 10 | 7 | 7 |
| SP05GA2    | SP1 | Malus x domestica | Royal Gala       | Spain | 22 | 2  | 14 | 2 | 7  | 6 | 7  | 9  | 5  | 18 | 4 | 7 |
| SP05GA20   | SP1 | Malus x domestica | Royal Gala       | Spain | 13 | 2  | 27 | 2 | 10 | 7 | 10 | 4  | 5  | 14 | 4 | 8 |
| SP05GA3    | SP1 | Malus x domestica | Royal Gala       | Spain | 7  | 9  | ?  | 3 | 7  | 6 | 6  | 6  | 8  | 12 | 7 | 8 |
| SP05GA4    | SP1 | Malus x domestica | Royal Gala       | Spain | 9  | 9  | 14 | 3 | 10 | 9 | 10 | 8  | 2  | 18 | 7 | 7 |
| SP05GA5    | SP1 | Malus x domestica | Royal Gala       | Spain | 13 | 10 | 8  | 2 | 7  | 6 | 11 | 8  | 5  | 9  | 4 | 8 |
| SP05GA6    | SP1 | Malus x domestica | Royal Gala       | Spain | 16 | 10 | 14 | 2 | ?  | 6 | 8  | 5  | 5  | 8  | 7 | ? |
| SP05GA8    | SP1 | Malus x domestica | Royal Gala       | Spain | 13 | 9  | 8  | 3 | 11 | 6 | 10 | 8  | 5  | 12 | 5 | 7 |
| SP05GA9    | SP1 | Malus x domestica | Royal Gala       | Spain | 17 | 9  | 9  | 2 | 10 | 6 | ?  | 8  | 5  | 8  | 4 | 8 |
| SP05GO23   | SP2 | Malus x domestica | Golden Delicious | Spain | 15 | 10 | 17 | 3 | 10 | 7 | 8  | 5  | 5  | 3  | 4 | 7 |
| SP05GO24   | SP2 | Malus x domestica | Golden Delicious | Spain | 13 | 10 | 6  | 2 | 10 | 6 | 9  | 6  | 2  | 11 | 5 | 7 |
| SP05GO25   | SP2 | Malus x domestica | Golden Delicious | Spain | 3  | 10 | 3  | 3 | 19 | 6 | 15 | ?  | 8  | 10 | ? | 8 |
| SP05GO27   | SP2 | Malus x domestica | Golden Delicious | Spain | 15 | 11 | 13 | 2 | 6  | 6 | 9  | 6  | 5  | 8  | 4 | 8 |
| SP05GO28   | SP2 | Malus x domestica | Golden Delicious | Spain | 15 | 10 | 17 | 3 | 10 | ? | 8  | 5  | 5  | 3  | 4 | 7 |
| SP05GO31   | SP2 | Malus x domestica | Golden Delicious | Spain | 12 | 9  | 17 | 2 | 7  | 7 | 10 | 6  | 5  | 12 | 5 | 8 |
| SP05GO33   | SP2 | Malus x domestica | Golden Delicious | Spain | 12 | 10 | ?  | 2 | 10 | 7 | 9  | 5  | 5  | 9  | 4 | 7 |
| SP05GO34   | SP2 | Malus x domestica | Golden Delicious | Spain | 19 | 9  | 19 | 2 | 10 | 7 | 6  | 6  | 8  | 12 | 6 | 8 |
| SP05GO35   | SP2 | Malus x domestica | Golden Delicious | Spain | 19 | 9  | 19 | 2 | 10 | 7 | 6  | 6  | 8  | 12 | 6 | 8 |
| SP05GO36   | SP2 | Malus x domestica | Golden Delicious | Spain | 12 | 13 | 15 | 2 | ?  | 7 | 10 | 5  | 8  | 9  | 4 | 7 |
| SP05GO37   | SP2 | Malus x domestica | Golden Delicious | Spain | 13 | 10 | 19 | 2 | ?  | 7 | 10 | 5  | 5  | 14 | 5 | 7 |
| SP05GO38   | SP2 | Malus x domestica | Golden Delicious | Spain | 3  | ?  | 8  | 2 | 16 | 7 | 10 | 5  | 6  | 3  | 7 | 8 |
| SP05GO39   | SP2 | Malus x domestica | Golden Delicious | Spain | 12 | 9  | 15 | 2 | 10 | 4 | 10 | 11 | 2  | 10 | 4 | 8 |
| SP05GO40   | SP2 | Malus x domestica | Golden Delicious | Spain | 12 | 9  | 18 | 3 | 6  | 6 | 9  | 10 | 5  | 14 | 4 | 8 |
| SP05GO41   | SP2 | Malus x domestica | Golden Delicious | Spain | 11 | 10 | 16 | 2 | 5  | 7 | 6  | 7  | 8  | 9  | 4 | 8 |
| SP05GO42   | SP2 | Malus x domestica | Golden Delicious | Spain | 13 | 10 | 16 | 2 | 10 | 9 | 11 | 7  | 8  | 4  | 4 | 2 |
| SP05Gold1  | SP2 | Malus x domestica | Golden Delicious | Spain | 16 | 9  | 20 | 2 | 10 | 9 | 15 | 7  | 5  | 10 | 4 | ? |
| SP05Gold11 | SP2 | Malus x domestica | Golden Delicious | Spain | 3  | ?  | 13 | 3 | 7  | 9 | 9  | 5  | 5  | ?  | 4 | 7 |
| SP05Gold12 | SP2 | Malus x domestica | Golden Delicious | Spain | 13 | 2  | 27 | 2 | 10 | 7 | 10 | 4  | 5  | 14 | 4 | 8 |
| SP05Gold13 | SP2 | Malus x domestica | Golden Delicious | Spain | 13 | 2  | 17 | 3 | 10 | 7 | 6  | 4  | 2  | 10 | 5 | 8 |
| SP05Gold16 | SP2 | Malus x domestica | Golden Delicious | Spain | 12 | ?  | 15 | 2 | 7  | 6 | 8  | 4  | 8  | ?  | 4 | 8 |
| SP05Gold17 | SP2 | Malus x domestica | Golden Delicious | Spain | 3  | 9  | 13 | 2 | 7  | 9 | 9  | 5  | 5  | 13 | 4 | ? |



|             |     |                   |                  |         |    |    |    |   |    |    |    |    |    |    |   |   |
|-------------|-----|-------------------|------------------|---------|----|----|----|---|----|----|----|----|----|----|---|---|
| SP05Gold18  | SP2 | Malus x domestica | Golden Delicious | Spain   | 13 | 10 | 18 | 3 | 10 | 9  | 6  | 5  | 2  | 11 | 6 | 2 |
| SP05Gold19  | SP2 | Malus x domestica | Golden Delicious | Spain   | 15 | 10 | 17 | 3 | 10 | ?  | 8  | 5  | 5  | 3  | 4 | 7 |
| SP05Gold2   | SP2 | Malus x domestica | Golden Delicious | Spain   | 3  | 13 | 22 | 2 | 6  | 7  | 10 | 5  | 8  | 9  | 4 | 8 |
| SP05Gold20  | SP2 | Malus x domestica | Golden Delicious | Spain   | 9  | 9  | 23 | ? | ?  | 7  | 8  | 7  | 5  | 9  | 4 | 7 |
| SP05Gold3   | SP2 | Malus x domestica | Golden Delicious | Spain   | 13 | 10 | 13 | 2 | 6  | 6  | 11 | 4  | 5  | 9  | 4 | 7 |
| SP05Gold4   | SP2 | Malus x domestica | Golden Delicious | Spain   | 13 | 10 | 6  | 2 | 10 | 6  | 9  | 4  | 2  | 11 | 4 | 7 |
| SP05Gold5   | SP2 | Malus x domestica | Golden Delicious | Spain   | 12 | 9  | 18 | 3 | 6  | 6  | 9  | 10 | 5  | 14 | 4 | 8 |
| SP05Gold6   | SP2 | Malus x domestica | Golden Delicious | Spain   | 13 | 10 | 6  | 2 | 10 | 6  | 10 | 4  | 2  | 11 | 4 | 7 |
| SP05Gold7   | SP2 | Malus x domestica | Golden Delicious | Spain   | 12 | 9  | 8  | 3 | 6  | 6  | 11 | 6  | 8  | 10 | 2 | 8 |
| SP05Gold9   | SP2 | Malus x domestica | Golden Delicious | Spain   | 13 | 9  | 17 | 2 | 7  | 9  | 8  | 6  | 8  | 8  | 5 | 7 |
| SP05WE10    | SP3 | Malus x domestica | Wellspur         | Spain   | 13 | 10 | 11 | 2 | 7  | 6  | 11 | 6  | 2  | 10 | 4 | 8 |
| SP05WE11    | SP3 | Malus x domestica | Wellspur         | Spain   | 10 | 10 | ?  | 2 | 8  | 9  | 8  | 8  | 11 | 5  | 4 | 7 |
| SP05WE12.1  | SP3 | Malus x domestica | Wellspur         | Spain   | 14 | ?  | 14 | 2 | 8  | 10 | 9  | 4  | 5  | 5  | 6 | 8 |
| SP05WE12.2  | SP3 | Malus x domestica | Wellspur         | Spain   | 14 | ?  | 14 | 2 | 8  | ?  | 9  | 4  | 5  | 5  | 5 | 8 |
| SP05WE13    | SP3 | Malus x domestica | Wellspur         | Spain   | 3  | 9  | 14 | 2 | 7  | 7  | 11 | 8  | 5  | 10 | 5 | 7 |
| SP05WE14    | SP3 | Malus x domestica | Wellspur         | Spain   | 10 | 9  | 14 | 2 | 7  | 7  | 8  | 12 | 8  | 8  | 4 | 7 |
| SP05WE15    | SP3 | Malus x domestica | Wellspur         | Spain   | 14 | 9  | 17 | 3 | 6  | 7  | 15 | 4  | 5  | 9  | 4 | 8 |
| SP05WE16    | SP3 | Malus x domestica | Wellspur         | Spain   | 5  | 9  | 22 | 3 | ?  | 6  | 8  | 5  | 8  | 12 | 4 | 8 |
| SP05WE17    | SP3 | Malus x domestica | Wellspur         | Spain   | 12 | 10 | 15 | 2 | 16 | 7  | 9  | 8  | 5  | 9  | 5 | 8 |
| SP05WE19    | SP3 | Malus x domestica | Wellspur         | Spain   | 10 | 9  | 14 | 2 | 7  | 7  | 9  | 12 | 8  | 8  | 4 | 7 |
| SP05WE20    | SP3 | Malus x domestica | Wellspur         | Spain   | 13 | 9  | 15 | 2 | 5  | 9  | 9  | 5  | 5  | 3  | 4 | 7 |
| SP05WE22    | SP3 | Malus x domestica | Wellspur         | Spain   | ?  | 9  | 19 | 2 | 11 | 6  | 14 | 9  | 5  | 11 | 4 | 8 |
| SP05WE23    | SP3 | Malus x domestica | Wellspur         | Spain   | 12 | 9  | 12 | 2 | 10 | 7  | 12 | 5  | 5  | 10 | 4 | 9 |
| SP05WE24    | SP3 | Malus x domestica | Wellspur         | Spain   | 12 | 10 | 17 | 2 | 7  | 7  | 10 | 6  | 8  | 4  | 5 | 7 |
| SP05WE27    | SP3 | Malus x domestica | Wellspur         | Spain   | 12 | 9  | 15 | 2 | 4  | 7  | 8  | 6  | 8  | 7  | 4 | 8 |
| SP05WE28    | SP3 | Malus x domestica | Wellspur         | Spain   | 12 | 8  | 17 | 2 | 14 | 6  | 8  | 8  | 2  | 10 | 4 | 8 |
| SP05WE29    | SP3 | Malus x domestica | Wellspur         | Spain   | ?  | 9  | 18 | 2 | 4  | 9  | 8  | 6  | 8  | 10 | 5 | 8 |
| SP05WE32    | SP3 | Malus x domestica | Wellspur         | Spain   | 13 | 11 | 17 | 2 | 7  | 9  | 11 | 5  | 8  | 9  | 7 | 8 |
| SP05WE61    | SP3 | Malus x domestica | Wellspur         | Spain   | 16 | 10 | 10 | 2 | ?  | 9  | 7  | 7  | 5  | 11 | 4 | 7 |
| SP05WE7     | SP3 | Malus x domestica | Wellspur         | Spain   | 21 | 10 | 9  | 2 | 7  | 7  | 8  | 7  | 5  | 9  | 4 | 8 |
| SP05WE81    | SP3 | Malus x domestica | Wellspur         | Spain   | 13 | 9  | 6  | 2 | 8  | 6  | 10 | 5  | 2  | 9  | 5 | 8 |
| SP05WE82    | SP3 | Malus x domestica | Wellspur         | Spain   | 13 | 9  | 6  | 2 | 8  | 6  | 10 | 5  | 2  | 9  | 7 | 8 |
| SP05WE91    | SP3 | Malus x domestica | Wellspur         | Spain   | 18 | 9  | 16 | 2 | 22 | 7  | 10 | 8  | 5  | 9  | 5 | 7 |
| SP05WE92    | SP3 | Malus x domestica | Wellspur         | Spain   | 13 | 9  | 14 | 2 | 7  | 7  | 11 | 6  | 2  | 8  | 5 | 8 |
| MA05S13.9.1 | MA1 | Malus x domestica | Chimère          | Morocco | 3  | 9  | 22 | 2 | 4  | 5  | 9  | 8  | 11 | 9  | 4 | 8 |
| MA05S13.9   | MA1 | Malus x domestica | Chimère          | Morocco | 11 | 9  | 12 | 2 | 9  | 7  | 8  | 6  | 5  | 10 | 4 | 8 |
| MA05S13.8.2 | MA1 | Malus x domestica | Chimère          | Morocco | 3  | 9  | 6  | 2 | 4  | 5  | ?  | 6  | 5  | 11 | 4 | ? |
| MA05S13.8.1 | MA1 | Malus x domestica | Chimère          | Morocco | 3  | 9  | 21 | 2 | 4  | 5  | 12 | 8  | 11 | 9  | 4 | 8 |
| MA05S13.8   | MA1 | Malus x domestica | Chimère          | Morocco | 3  | 9  | 6  | 2 | 12 | 7  | 10 | 8  | 16 | 3  | 5 | 8 |
| MA05S13.7.1 | MA1 | Malus x domestica | Chimère          | Morocco | 3  | 10 | ?  | 2 | 8  | 7  | 10 | 7  | 5  | 8  | 4 | 2 |
| MA05S13.7   | MA1 | Malus x domestica | Chimère          | Morocco | 3  | 9  | 6  | 2 | 12 | 5  | 10 | 8  | 16 | 3  | 5 | 8 |

|              |     |                   |         |         |    |    |    |   |    |   |    |   |    |    |   |   |
|--------------|-----|-------------------|---------|---------|----|----|----|---|----|---|----|---|----|----|---|---|
| MA05S13.6.1  | MA1 | Malus x domestica | Chimère | Morocco | 3  | 9  | ?  | 2 | 4  | 5 | 10 | 8 | 11 | 9  | 4 | 8 |
| MA05S13.6    | MA1 | Malus x domestica | Chimère | Morocco | 3  | 9  | 6  | 2 | 12 | 5 | 10 | 8 | 16 | 3  | 5 | 8 |
| MA05S13.5    | MA1 | Malus x domestica | Chimère | Morocco | 12 | 9  | 6  | 2 | 4  | 5 | 10 | 6 | 5  | 11 | 4 | 8 |
| MA05S13.4    | MA1 | Malus x domestica | Chimère | Morocco | 11 | 9  | 16 | 2 | 9  | 9 | ?  | 6 | 5  | 3  | 4 | 7 |
| MA05S13.3    | MA1 | Malus x domestica | Chimère | Morocco | 3  | 9  | 21 | 2 | 4  | 5 | 10 | 8 | 11 | 9  | 4 | 8 |
| MA05S13.2    | MA1 | Malus x domestica | Chimère | Morocco | 12 | 2  | 6  | 2 | 4  | 5 | 10 | 6 | 5  | 11 | 4 | 8 |
| MA05S13.19.1 | MA1 | Malus x domestica | Chimère | Morocco | 16 | 9  | 21 | 2 | 9  | 5 | 10 | 8 | 5  | 9  | 4 | 8 |
| MA05S13.18.1 | MA1 | Malus x domestica | Chimère | Morocco | 12 | 9  | 6  | 2 | 4  | 5 | 10 | 6 | 5  | 11 | 4 | 8 |
| MA05S13.17.1 | MA1 | Malus x domestica | Chimère | Morocco | 12 | 9  | 6  | 2 | 4  | 5 | 10 | 6 | 5  | 11 | 4 | 8 |
| MA05S13.16.1 | MA1 | Malus x domestica | Chimère | Morocco | 3  | ?  | 21 | ? | 4  | 5 | 10 | 8 | 11 | ?  | 4 | 8 |
| MA05S13.15.1 | MA1 | Malus x domestica | Chimère | Morocco | 3  | 9  | 21 | 2 | 4  | 5 | 10 | 8 | 16 | 11 | 5 | 8 |
| MA05S13.14.1 | MA1 | Malus x domestica | Chimère | Morocco | 3  | 9  | 6  | 2 | 12 | 5 | 10 | 8 | 5  | 3  | 5 | 8 |
| MA05S13.13.1 | MA1 | Malus x domestica | Chimère | Morocco | 3  | 9  | 6  | 2 | 12 | 5 | ?  | 8 | 16 | 3  | 5 | ? |
| MA05S13.12.1 | MA1 | Malus x domestica | Chimère | Morocco | 12 | 10 | 17 | 2 | 9  | 6 | 11 | 8 | 2  | 3  | 4 | 7 |
| MA05S13.11.1 | MA1 | Malus x domestica | Chimère | Morocco | 3  | 9  | 21 | 2 | 4  | 9 | 10 | 6 | 16 | 11 | 5 | 8 |
| MA05S13.11   | MA1 | Malus x domestica | Chimère | Morocco | 3  | 9  | 15 | 2 | 8  | 6 | ?  | 8 | 5  | 11 | 4 | 8 |
| MA05S13.10.1 | MA1 | Malus x domestica | Chimère | Morocco | 11 | 9  | 23 | 2 | 4  | 5 | 10 | 6 | 11 | 11 | 4 | 8 |
| MA05S13.10   | MA1 | Malus x domestica | Chimère | Morocco | 16 | 9  | 4  | 2 | 12 | 7 | ?  | 6 | 16 | 9  | 5 | 8 |
| MA05S13.1    | MA1 | Malus x domestica | Chimère | Morocco | 3  | 9  | 6  | 2 | 12 | 5 | 10 | 8 | 16 | 3  | 5 | 8 |
| MA05S11F51L1 | MA2 | Malus x domestica | Chimère | Morocco | 13 | 9  | 21 | 2 | 9  | 7 | 11 | 7 | 8  | 3  | 4 | 7 |
| MA05S11F50L1 | MA2 | Malus x domestica | Chimère | Morocco | 12 | 9  | 21 | 2 | 4  | 9 | ?  | 8 | 11 | 11 | 4 | 8 |
| MA05S11F49L1 | MA2 | Malus x domestica | Chimère | Morocco | 3  | 9  | 19 | 2 | 4  | 6 | 7  | 6 | 5  | 14 | 7 | 8 |
| MA05S11F48L1 | MA2 | Malus x domestica | Chimère | Morocco | 3  | 9  | 16 | 2 | 12 | 7 | 8  | 6 | 11 | 10 | 5 | 8 |
| MA05S11F47L1 | MA2 | Malus x domestica | Chimère | Morocco | 11 | 9  | 16 | 2 | 12 | 5 | 10 | 4 | 16 | 3  | 5 | 2 |
| MA05S11F46L1 | MA2 | Malus x domestica | Chimère | Morocco | 3  | 9  | 19 | 2 | 4  | 6 | 7  | 6 | 5  | 14 | 7 | 8 |
| MA05S11F45L1 | MA2 | Malus x domestica | Chimère | Morocco | 3  | 9  | 21 | 2 | 4  | 5 | 10 | 8 | 11 | 9  | 4 | 8 |
| MA05S11F44L1 | MA2 | Malus x domestica | Chimère | Morocco | 3  | 9  | 21 | 2 | 12 | 5 | 10 | 8 | 18 | 11 | 5 | 8 |
| MA05S11F43L1 | MA2 | Malus x domestica | Chimère | Morocco | 3  | 9  | 6  | 2 | 12 | 5 | 10 | 8 | 16 | 3  | 5 | 8 |
| MA05S11F42L1 | MA2 | Malus x domestica | Chimère | Morocco | 11 | 9  | 12 | 2 | 9  | 7 | 8  | 6 | 5  | 10 | 4 | 8 |
| MA05S11F41L1 | MA2 | Malus x domestica | Chimère | Morocco | 3  | 9  | 6  | 2 | 13 | 5 | 10 | 8 | 16 | 3  | 5 | 8 |
| MA05S11F40L1 | MA2 | Malus x domestica | Chimère | Morocco | 11 | 6  | 21 | 2 | 12 | 5 | 10 | 8 | 5  | 11 | 5 | 8 |
| MA05S11F39L1 | MA2 | Malus x domestica | Chimère | Morocco | 3  | 10 | 24 | 2 | 8  | 7 | 11 | 7 | 8  | 8  | 4 | 7 |
| MA05S11F38L1 | MA2 | Malus x domestica | Chimère | Morocco | 3  | 10 | 24 | 2 | 8  | 7 | 11 | 7 | 8  | 8  | 4 | 7 |
| MA05S11F37L1 | MA2 | Malus x domestica | Chimère | Morocco | 3  | 9  | 21 | 2 | 4  | 5 | 10 | 6 | 11 | 10 | 4 | 8 |
| MA05S11AN6   | MA2 | Malus x domestica | Anna    | Morocco | 3  | 9  | 6  | 2 | 12 | 5 | 10 | 8 | 16 | 3  | 5 | 8 |
| MA05S11AN5.1 | MA2 | Malus x domestica | Anna    | Morocco | 12 | 9  | 6  | 2 | 4  | 5 | 10 | 6 | 5  | 11 | 4 | 8 |
| MA05S11AN35  | MA2 | Malus x domestica | Anna    | Morocco | 3  | 9  | 6  | 2 | 4  | 5 | 10 | 6 | 5  | 11 | 4 | 8 |
| MA05S11AN34  | MA2 | Malus x domestica | Anna    | Morocco | 3  | 9  | 6  | 2 | 4  | 5 | 10 | 6 | 5  | 11 | 4 | 8 |
| MA05S11AN32  | MA2 | Malus x domestica | Anna    | Morocco | 12 | 9  | 6  | 2 | 4  | 5 | 10 | 6 | 5  | 11 | 4 | 8 |
| MA05S11AN3.1 | MA2 | Malus x domestica | Anna    | Morocco | 3  | 9  | 19 | 2 | 4  | 6 | 7  | 6 | 5  | 14 | 7 | 8 |
| MA05S11AN28  | MA2 | Malus x domestica | Anna    | Morocco | 13 | 6  | 16 | 2 | 12 | 7 | 10 | 6 | 16 | 10 | 5 | 8 |

|               |     |                   |         |         |    |    |    |   |    |   |    |   |    |    |   |   |
|---------------|-----|-------------------|---------|---------|----|----|----|---|----|---|----|---|----|----|---|---|
| MA05S11AN21.1 | MA2 | Malus x domestica | Anna    | Morocco | 3  | 9  | 16 | 2 | 13 | 5 | 10 | 8 | 8  | 3  | 8 | 8 |
| MA05S11AN20   | MA2 | Malus x domestica | Anna    | Morocco | 3  | 9  | 6  | 2 | 12 | 5 | 10 | 8 | 16 | 3  | 5 | 8 |
| MA05S11AN19.1 | MA2 | Malus x domestica | Anna    | Morocco | 3  | 10 | 24 | 2 | 8  | 7 | 11 | 7 | 8  | 8  | 4 | 7 |
| MA05S11AN18.1 | MA2 | Malus x domestica | Anna    | Morocco | 3  | 9  | 6  | 2 | 12 | 5 | 10 | 8 | 16 | 3  | 5 | 8 |
| MA05S11AN15.1 | MA2 | Malus x domestica | Anna    | Morocco | 3  | 9  | 6  | 2 | 12 | 5 | 10 | 8 | 8  | 3  | 5 | 8 |
| MA05S11AN13.1 | MA2 | Malus x domestica | Anna    | Morocco | 3  | 9  | 6  | 2 | 12 | 5 | 10 | 8 | 16 | 3  | 5 | 8 |
| MA05S11AN12   | MA2 | Malus x domestica | Anna    | Morocco | 3  | 9  | 6  | 2 | 12 | 5 | 10 | 8 | 16 | 3  | 5 | 8 |
| MA05S1AN9     | MA3 | Malus x domestica | Anna    | Morocco | 11 | 9  | 21 | 2 | 4  | 9 | ?  | 6 | 11 | 12 | 4 | 8 |
| MA05S1AN8     | MA3 | Malus x domestica | Anna    | Morocco | 3  | 6  | 21 | 2 | 9  | 9 | ?  | 8 | 5  | 11 | 4 | 8 |
| MA05S1AN7     | MA3 | Malus x domestica | Anna    | Morocco | 3  | 9  | 21 | 2 | 4  | 5 | 10 | 6 | 11 | 3  | 4 | 8 |
| MA05S1AN6     | MA3 | Malus x domestica | Anna    | Morocco | 11 | 9  | 4  | 2 | 4  | 9 | ?  | 8 | 5  | 3  | 4 | ? |
| MA05S1AN5     | MA3 | Malus x domestica | Anna    | Morocco | 11 | 9  | 16 | 2 | 9  | 9 | ?  | 6 | 5  | 3  | 3 | 8 |
| MA05S1AN4     | MA3 | Malus x domestica | Anna    | Morocco | 11 | 6  | 11 | 2 | 4  | 5 | 10 | 4 | 5  | 3  | 4 | 8 |
| MA05S1AN34    | MA3 | Malus x domestica | Anna    | Morocco | 11 | 9  | 21 | 2 | 6  | 5 | 10 | 9 | 8  | 11 | 4 | 2 |
| MA05S1AN33.1  | MA3 | Malus x domestica | Anna    | Morocco | 11 | 6  | 21 | 2 | 4  | 5 | 10 | 6 | 11 | 3  | 4 | 8 |
| MA05S1AN32    | MA3 | Malus x domestica | Anna    | Morocco | 14 | 9  | 21 | 2 | ?  | 9 | 10 | 4 | 5  | 3  | ? | 8 |
| MA05S1AN31.1  | MA3 | Malus x domestica | Anna    | Morocco | 11 | 9  | 4  | 2 | 9  | 9 | 10 | 4 | 5  | 3  | 4 | 8 |
| MA05S1AN3     | MA3 | Malus x domestica | Anna    | Morocco | 11 | 9  | 21 | 2 | 9  | 5 | 10 | 8 | 5  | 11 | 4 | 7 |
| MA05S1AN29    | MA3 | Malus x domestica | Anna    | Morocco | 11 | 10 | 16 | 2 | 9  | 5 | 8  | 8 | 11 | 11 | 5 | 7 |
| MA05S1AN28    | MA3 | Malus x domestica | Anna    | Morocco | 11 | 9  | 20 | 2 | 4  | 9 | ?  | 6 | 11 | 12 | 4 | 8 |
| MA05S1AN27    | MA3 | Malus x domestica | Anna    | Morocco | 11 | 6  | 21 | 2 | 4  | 5 | 10 | 6 | 11 | 3  | 4 | 8 |
| MA05S1AN26    | MA3 | Malus x domestica | Anna    | Morocco | 12 | 10 | 22 | 2 | 3  | 9 | 10 | ? | 11 | 11 | 4 | 8 |
| MA05S1AN25    | MA3 | Malus x domestica | Anna    | Morocco | 11 | 9  | 21 | 2 | ?  | 5 | 10 | 9 | 8  | 11 | 4 | 2 |
| MA05S1AN24.1  | MA3 | Malus x domestica | Anna    | Morocco | 12 | 10 | 22 | 2 | 3  | 9 | 10 | 8 | 11 | 11 | 4 | 8 |
| MA05S1AN23    | MA3 | Malus x domestica | Anna    | Morocco | 3  | 9  | 4  | 2 | 4  | 5 | ?  | 4 | 11 | 11 | 4 | 8 |
| MA05S1AN22    | MA3 | Malus x domestica | Anna    | Morocco | 11 | 9  | 4  | 3 | 4  | 5 | 10 | 9 | 11 | 11 | 4 | 8 |
| MA05S1AN21.2  | MA3 | Malus x domestica | Anna    | Morocco | 11 | 9  | 22 | 2 | 12 | 5 | 6  | 4 | 16 | 3  | 5 | 8 |
| MA05S1AN20.1  | MA3 | Malus x domestica | Anna    | Morocco | 11 | 6  | 21 | 2 | 4  | 5 | 10 | 6 | 11 | 3  | 4 | 8 |
| MA05S1AN2     | MA3 | Malus x domestica | Anna    | Morocco | 11 | 6  | 21 | 2 | 4  | 5 | 10 | 6 | 5  | 9  | 4 | 8 |
| MA05S1AN19.3  | MA3 | Malus x domestica | Anna    | Morocco | 14 | 9  | 16 | 2 | 7  | 5 | 10 | 6 | 16 | 11 | 5 | 8 |
| MA05S1AN18.1  | MA3 | Malus x domestica | Anna    | Morocco | 11 | 6  | 21 | 2 | 4  | 5 | 10 | 6 | 5  | 9  | 4 | 7 |
| MA05S1AN17    | MA3 | Malus x domestica | Anna    | Morocco | ?  | 9  | 21 | 3 | 9  | 7 | ?  | 9 | 8  | 11 | ? | 7 |
| MA05S1AN16    | MA3 | Malus x domestica | Anna    | Morocco | 11 | 9  | 21 | 2 | 9  | 7 | 11 | 7 | 5  | 8  | 4 | 8 |
| MA05S1AN15    | MA3 | Malus x domestica | Anna    | Morocco | 12 | 9  | 16 | 2 | ?  | 6 | ?  | 9 | 5  | 11 | 4 | 7 |
| MA05S1AN14.1  | MA3 | Malus x domestica | Anna    | Morocco | 11 | 9  | 21 | 3 | 9  | 5 | 10 | 6 | 5  | 3  | 4 | 8 |
| MA05S1AN13    | MA3 | Malus x domestica | Anna    | Morocco | 11 | 6  | 21 | 2 | 4  | 5 | 10 | 6 | 5  | 9  | 4 | 8 |
| MA05S1AN12    | MA3 | Malus x domestica | Anna    | Morocco | 11 | 9  | 21 | 2 | 6  | 5 | 10 | 9 | 8  | 11 | 4 | 2 |
| MA05S1AN11    | MA3 | Malus x domestica | Anna    | Morocco | 3  | 10 | 21 | 3 | 5  | 7 | 11 | 7 | 11 | 8  | 5 | 8 |
| MA05S1AN10    | MA3 | Malus x domestica | Anna    | Morocco | 3  | 9  | 21 | 2 | 8  | 5 | 6  | 6 | 11 | 3  | 4 | 7 |
| MA05S1AN1     | MA3 | Malus x domestica | Anna    | Morocco | 11 | 10 | 21 | 3 | ?  | 7 | 11 | 7 | 11 | 9  | 5 | 8 |
| MA06MBK1DO1   | MA4 | Malus x domestica | Dorsett | Morocco | 3  | 9  | 6  | 2 | 9  | 5 | 13 | 6 | 5  | 11 | 4 | 7 |

|              |     |                   |            |         |    |    |    |   |    |    |    |    |    |    |   |   |
|--------------|-----|-------------------|------------|---------|----|----|----|---|----|----|----|----|----|----|---|---|
| MA06MBK1DO11 | MA4 | Malus x domestica | Dorsett    | Morocco | 12 | 9  | ?  | 2 | 6  | 7  | ?  | 9  | ?  | 11 | 6 | 8 |
| MA06MBK1DO14 | MA4 | Malus x domestica | Dorsett    | Morocco | 11 | 9  | 20 | 2 | 4  | 9  | 9  | 6  | 11 | 12 | 4 | 8 |
| MA06MBK1DO16 | MA4 | Malus x domestica | Dorsett    | Morocco | 11 | 6  | 21 | 2 | 4  | 5  | 10 | 6  | 11 | 3  | 4 | 8 |
| MA06MBK1DO17 | MA4 | Malus x domestica | Dorsett    | Morocco | 11 | 9  | 22 | 3 | ?  | 7  | 10 | 6  | 16 | 3  | 6 | 8 |
| MA06MBK1DO18 | MA4 | Malus x domestica | Dorsett    | Morocco | 11 | 6  | 20 | 2 | 4  | 5  | 10 | 6  | 11 | 3  | 4 | 8 |
| MA06MBK1DO19 | MA4 | Malus x domestica | Dorsett    | Morocco | ?  | 9  | 21 | 2 | ?  | 9  | ?  | 12 | 8  | 3  | 4 | 7 |
| MA06MBK1DO2  | MA4 | Malus x domestica | Dorsett    | Morocco | 11 | 6  | 21 | 2 | ?  | 5  | 8  | 6  | 8  | 11 | ? | 8 |
| MA06MBK1DO23 | MA4 | Malus x domestica | Dorsett    | Morocco | 3  | 9  | 21 | 2 | ?  | 9  | 12 | 8  | 8  | 11 | 4 | 8 |
| MA06MBK1DO24 | MA4 | Malus x domestica | Dorsett    | Morocco | 3  | 9  | 4  | 2 | 9  | 5  | 11 | 6  | 8  | 8  | 4 | 7 |
| MA06MBK1DO26 | MA4 | Malus x domestica | Dorsett    | Morocco | 11 | 9  | 22 | 3 | 4  | 5  | 10 | 6  | 11 | 11 | 4 | 8 |
| MA06MBK1DO27 | MA4 | Malus x domestica | Dorsett    | Morocco | 11 | 6  | 21 | 2 | 4  | 5  | 10 | 6  | 11 | 3  | 4 | 8 |
| MA06MBK1DO28 | MA4 | Malus x domestica | Dorsett    | Morocco | 11 | 9  | 21 | 3 | 7  | 5  | 11 | 9  | 8  | 12 | 4 | 8 |
| MA06MBK1DO3  | MA4 | Malus x domestica | Dorsett    | Morocco | 11 | 9  | 21 | 2 | 4  | 5  | 10 | 9  | 5  | 3  | 6 | 8 |
| MA06MBK1DO32 | MA4 | Malus x domestica | Dorsett    | Morocco | 3  | 6  | 21 | 2 | 9  | 5  | 10 | 8  | 11 | 9  | 4 | 8 |
| MA06MBK1DO33 | MA4 | Malus x domestica | Dorsett    | Morocco | 11 | 9  | 21 | 2 | 4  | 5  | 10 | 5  | 5  | 9  | 4 | 8 |
| MA06MBK1DO34 | MA4 | Malus x domestica | Dorsett    | Morocco | 11 | 9  | 4  | 2 | 9  | 7  | 10 | 6  | 5  | 3  | 4 | 8 |
| MA06MBK1DO35 | MA4 | Malus x domestica | Dorsett    | Morocco | 11 | 9  | 22 | 2 | 9  | 5  | 10 | 6  | 5  | 11 | 4 | ? |
| MA06MBK1DO36 | MA4 | Malus x domestica | Dorsett    | Morocco | 11 | 9  | 21 | 2 | 4  | 5  | 10 | 5  | 11 | 3  | 4 | 8 |
| MA06MBK1DO37 | MA4 | Malus x domestica | Dorsett    | Morocco | 11 | 9  | 21 | 2 | 9  | 5  | 10 | 5  | 5  | 3  | 4 | 8 |
| MA06MBK1DO4  | MA4 | Malus x domestica | Dorsett    | Morocco | 11 | 9  | 21 | 3 | 9  | 5  | 10 | 6  | 5  | 3  | ? | 8 |
| MA06MBK1DO43 | MA4 | Malus x domestica | Dorsett    | Morocco | 11 | 6  | 21 | 2 | 4  | 5  | 10 | 6  | 11 | 3  | 4 | 8 |
| MA06MBK1DO44 | MA4 | Malus x domestica | Dorsett    | Morocco | 11 | 6  | 21 | 2 | 4  | 9  | 10 | 4  | 8  | 3  | 4 | 8 |
| MA06MBK1DO45 | MA4 | Malus x domestica | Dorsett    | Morocco | 11 | 6  | 18 | 3 | 9  | 9  | 10 | 4  | 5  | 7  | 4 | 8 |
| MA06MBK1DO46 | MA4 | Malus x domestica | Dorsett    | Morocco | 3  | 9  | 21 | 2 | 6  | 5  | 10 | 9  | 8  | 11 | 4 | 2 |
| MA06MBK1DO48 | MA4 | Malus x domestica | Dorsett    | Morocco | 11 | 9  | 4  | 2 | 6  | 9  | 12 | 4  | 8  | 11 | 4 | 8 |
| MA06MBK1DO6  | MA4 | Malus x domestica | Dorsett    | Morocco | 12 | 9  | 6  | 2 | 4  | 5  | 10 | 6  | 5  | 11 | 4 | 8 |
| MA06MBK1DO7  | MA4 | Malus x domestica | Dorsett    | Morocco | 3  | 9  | 21 | 2 | ?  | 5  | 10 | 8  | 5  | 11 | 4 | 2 |
| MA06MBK2GA10 | MA5 | Malus x domestica | Royal Gala | Morocco | ?  | ?  | 4  | 2 | 7  | 9  | 12 | ?  | 8  | 12 | 4 | 8 |
| MA06MBK2GA11 | MA5 | Malus x domestica | Royal Gala | Morocco | 11 | 10 | ?  | 2 | 7  | 9  | 9  | 10 | 8  | 10 | 6 | ? |
| MA06MBK2GA12 | MA5 | Malus x domestica | Royal Gala | Morocco | 3  | 10 | 20 | 2 | 7  | 7  | 11 | 8  | 8  | 11 | 5 | ? |
| MA06MBK2GA13 | MA5 | Malus x domestica | Royal Gala | Morocco | 3  | 10 | 21 | 2 | 9  | 5  | 10 | 6  | 5  | 8  | 4 | 7 |
| MA06MBK2GA14 | MA5 | Malus x domestica | Royal Gala | Morocco | 12 | 9  | 9  | 3 | ?  | 6  | ?  | ?  | 5  | 8  | 6 | 8 |
| MA06MBK2GA15 | MA5 | Malus x domestica | Royal Gala | Morocco | 12 | 2  | ?  | 2 | 7  | 10 | 8  | 8  | 8  | 9  | 6 | 7 |
| MA06MBK2GA16 | MA5 | Malus x domestica | Royal Gala | Morocco | 11 | 8  | 20 | 2 | ?  | 5  | 8  | 4  | 8  | 3  | 6 | 8 |
| MA06MBK2GA18 | MA5 | Malus x domestica | Royal Gala | Morocco | 12 | 9  | 24 | 2 | 4  | 9  | ?  | 7  | 11 | 8  | 4 | 7 |
| MA06MBK2GA20 | MA5 | Malus x domestica | Royal Gala | Morocco | 11 | 9  | ?  | 2 | 9  | 7  | ?  | 8  | 8  | 5  | 4 | 8 |
| MA06MBK2GA21 | MA5 | Malus x domestica | Royal Gala | Morocco | ?  | 9  | ?  | 2 | 5  | 10 | 5  | 8  | ?  | 10 | 6 | 8 |
| MA06MBK2GA22 | MA5 | Malus x domestica | Royal Gala | Morocco | 11 | 2  | 5  | 2 | 5  | 5  | 6  | ?  | 2  | 9  | 6 | 8 |
| MA06MBK2GA27 | MA5 | Malus x domestica | Royal Gala | Morocco | 12 | 9  | 24 | 2 | 4  | 9  | 8  | 7  | 11 | 8  | 4 | 7 |
| MA06MBK2GA3  | MA5 | Malus x domestica | Royal Gala | Morocco | ?  | 6  | 21 | 3 | 12 | 9  | 10 | 6  | 5  | 3  | 4 | 8 |
| MA06MBK2GA30 | MA5 | Malus x domestica | Royal Gala | Morocco | ?  | 6  | 21 | 2 | ?  | 7  | 10 | 8  | 5  | 11 | 4 | 8 |

|              |     |                   |            |         |    |    |    |   |    |    |    |    |    |    |   |    |
|--------------|-----|-------------------|------------|---------|----|----|----|---|----|----|----|----|----|----|---|----|
| MA06MBK2GA35 | MA5 | Malus x domestica | Royal Gala | Morocco | 11 | 9  | 21 | 2 | 4  | 6  | 4  | 8  | 5  | 3  | 4 | 8  |
| MA06MBK2GA38 | MA5 | Malus x domestica | Royal Gala | Morocco | 12 | 6  | 21 | 2 | ?  | 9  | 10 | 8  | 8  | 3  | 6 | 7  |
| MA06MBK2GA40 | MA5 | Malus x domestica | Royal Gala | Morocco | 11 | 6  | 18 | 3 | 9  | 5  | 10 | 8  | 8  | 7  | 4 | 8  |
| MA06MBK2GA41 | MA5 | Malus x domestica | Royal Gala | Morocco | 11 | 6  | 18 | 3 | 9  | 5  | 10 | 8  | 8  | 7  | 4 | 8  |
| MA06MBK2GA42 | MA5 | Malus x domestica | Royal Gala | Morocco | ?  | 9  | ?  | 3 | 4  | 9  | ?  | 12 | 8  | 10 | 6 | 8  |
| MA06MBK2GA43 | MA5 | Malus x domestica | Royal Gala | Morocco | 11 | 10 | 21 | 3 | 4  | 7  | 12 | 9  | 8  | 8  | 6 | 8  |
| MA06MBK2GA44 | MA5 | Malus x domestica | Royal Gala | Morocco | 12 | 10 | 21 | 3 | 4  | 7  | 12 | 7  | 11 | 8  | 4 | 8  |
| MA06MBK2GA5  | MA5 | Malus x domestica | Royal Gala | Morocco | 12 | 9  | ?  | 2 | 5  | 9  | 6  | 7  | 5  | 8  | 6 | 7  |
| MA06MBK2GA7  | MA5 | Malus x domestica | Royal Gala | Morocco | 12 | 2  | 24 | 2 | 5  | 7  | 7  | 8  | 5  | 9  | 6 | ?  |
| MA06MBK2GA8  | MA5 | Malus x domestica | Royal Gala | Morocco | 11 | 10 | 21 | 3 | 4  | 7  | 11 | 8  | ?  | 8  | 5 | 8  |
| MA06MBK2GA9  | MA5 | Malus x domestica | Royal Gala | Morocco | 11 | 9  | 6  | 3 | 9  | 5  | 10 | 5  | 5  | 3  | 4 | 8  |
| US06GECO1    | US1 | Malus x domestica | Cortland   | USA     | 11 | 9  | 9  | 2 | 21 | 7  | ?  | 5  | 8  | 9  | 6 | 2  |
| US06GECO11   | US1 | Malus x domestica | Cortland   | USA     | 11 | 10 | ?  | 2 | 14 | 7  | 8  | 7  | 5  | 6  | 6 | 7  |
| US06GECO12   | US1 | Malus x domestica | Cortland   | USA     | 10 | 10 | 22 | 2 | 14 | 6  | 9  | 7  | 11 | 10 | 6 | 2  |
| US06GECO17.2 | US1 | Malus x domestica | Cortland   | USA     | 3  | 9  | ?  | 2 | 21 | 7  | 8  | 7  | 5  | 9  | 4 | 8  |
| US06GECO18   | US1 | Malus x domestica | Cortland   | USA     | 3  | 9  | ?  | 2 | 7  | 7  | 8  | 5  | 8  | 10 | 4 | 7  |
| US06GECO2    | US1 | Malus x domestica | Cortland   | USA     | 13 | 18 | 4  | 2 | 2  | 9  | 11 | 7  | 8  | 10 | 6 | 2  |
| US06GECO20   | US1 | Malus x domestica | Cortland   | USA     | 5  | 21 | 8  | 2 | 14 | 7  | ?  | 4  | 2  | 6  | 6 | 7  |
| US06GECO21   | US1 | Malus x domestica | Cortland   | USA     | 12 | 9  | 15 | 3 | 8  | 9  | 9  | 7  | 5  | 3  | 6 | 2  |
| US06GECO22   | US1 | Malus x domestica | Cortland   | USA     | 12 | 9  | 7  | 2 | 6  | 9  | 9  | 7  | 5  | 10 | 6 | 8  |
| US06GECO23   | US1 | Malus x domestica | Cortland   | USA     | 3  | 9  | 13 | 3 | 14 | 7  | 8  | 7  | 8  | 9  | 6 | 2  |
| US06GECO25   | US1 | Malus x domestica | Cortland   | USA     | 3  | 9  | 7  | 3 | 13 | 7  | ?  | 4  | 5  | 13 | 4 | 8  |
| US06GECO27   | US1 | Malus x domestica | Cortland   | USA     | 11 | 9  | 16 | 3 | 2  | 7  | 10 | 4  | 8  | 11 | 6 | 8  |
| US06GECO28   | US1 | Malus x domestica | Cortland   | USA     | 12 | 9  | 11 | 2 | 17 | 9  | ?  | 7  | 8  | 7  | 9 | 8  |
| US06GECO29   | US1 | Malus x domestica | Cortland   | USA     | 12 | 9  | 7  | 2 | 15 | 7  | ?  | 6  | 8  | 9  | 6 | 2  |
| US06GECO3    | US1 | Malus x domestica | Cortland   | USA     | 12 | 9  | 6  | 2 | 18 | 7  | 5  | 4  | 5  | 5  | 6 | 2  |
| US06GECO36   | US1 | Malus x domestica | Cortland   | USA     | 12 | 9  | 2  | 2 | 16 | ?  | 7  | 6  | 8  | 10 | 6 | 8  |
| US06GECO39   | US1 | Malus x domestica | Cortland   | USA     | 3  | 9  | 3  | 2 | 14 | 7  | ?  | 7  | 5  | 3  | 4 | 12 |
| US06GECO6    | US1 | Malus x domestica | Cortland   | USA     | 3  | 10 | 11 | 2 | 14 | ?  | 6  | 5  | 5  | 5  | 6 | 8  |
| US06GECO8    | US1 | Malus x domestica | Cortland   | USA     | 3  | 9  | 12 | 2 | 14 | 9  | 8  | ?  | 2  | 11 | 8 | 2  |
| US06GEMI1    | US2 | Malus x domestica | McIntosh   | USA     | 11 | 10 | 9  | 3 | 7  | 7  | ?  | 7  | 8  | 10 | 6 | 2  |
| US06GEMI10   | US2 | Malus x domestica | McIntosh   | USA     | 11 | 9  | 8  | 2 | 16 | 7  | 9  | 7  | 8  | 9  | 6 | 2  |
| US06GEMI11   | US2 | Malus x domestica | McIntosh   | USA     | 11 | 9  | 17 | 3 | 15 | 4  | 9  | 7  | 8  | 10 | 6 | 2  |
| US06GEMI11.2 | US2 | Malus x domestica | McIntosh   | USA     | 3  | 6  | 5  | 2 | 15 | 7  | 7  | 5  | 8  | 10 | 8 | 8  |
| US06GEMI12   | US2 | Malus x domestica | McIntosh   | USA     | 12 | 9  | 13 | 2 | 7  | 7  | 6  | 4  | 8  | 9  | 6 | 2  |
| US06GEMI13   | US2 | Malus x domestica | McIntosh   | USA     | 12 | 10 | 2  | 3 | 16 | 9  | 6  | 5  | 8  | 10 | 8 | 2  |
| US06GEMI15   | US2 | Malus x domestica | McIntosh   | USA     | 14 | 10 | 11 | 3 | 14 | 6  | 9  | 7  | 2  | 10 | 4 | 2  |
| US06GEMI16   | US2 | Malus x domestica | McIntosh   | USA     | 14 | 10 | 3  | 2 | 17 | 10 | ?  | 4  | 8  | 10 | 6 | 7  |
| US06GEMI16.2 | US2 | Malus x domestica | McIntosh   | USA     | 13 | 9  | 11 | 2 | 6  | 7  | ?  | 7  | 5  | 9  | 6 | 8  |
| US06GEMI17   | US2 | Malus x domestica | McIntosh   | USA     | 13 | 2  | 8  | 2 | 4  | 7  | 8  | 7  | 5  | 9  | 6 | 2  |
| US06GEMI2    | US2 | Malus x domestica | McIntosh   | USA     | 11 | 9  | 12 | 2 | 5  | ?  | 9  | 5  | 8  | 5  | 6 | 2  |

|              |     |                   |               |     |    |    |    |   |    |   |    |    |    |    |   |    |
|--------------|-----|-------------------|---------------|-----|----|----|----|---|----|---|----|----|----|----|---|----|
| US06GEMI20.2 | US2 | Malus x domestica | McIntosh      | USA | 12 | 2  | 8  | 2 | 14 | 9 | 10 | 6  | 5  | 6  | 7 | 2  |
| US06GEMI21   | US2 | Malus x domestica | McIntosh      | USA | 3  | 9  | 3  | 2 | 14 | 7 | 10 | 5  | 5  | 10 | 6 | 2  |
| US06GEMI25   | US2 | Malus x domestica | McIntosh      | USA | 11 | 9  | 7  | 2 | 12 | 7 | 9  | 7  | 5  | 12 | ? | 2  |
| US06GEMI28   | US2 | Malus x domestica | McIntosh      | USA | 11 | 9  | 11 | 2 | 17 | 7 | 10 | 5  | 8  | 3  | 6 | 8  |
| US06GEMI29   | US2 | Malus x domestica | McIntosh      | USA | 11 | 9  | 7  | 3 | 2  | ? | ?  | 4  | 1  | 18 | 6 | 2  |
| US06GEMI3    | US2 | Malus x domestica | McIntosh      | USA | 11 | 9  | 16 | 2 | ?  | 7 | 8  | 8  | 5  | 7  | 4 | 8  |
| US06GEMI30   | US2 | Malus x domestica | McIntosh      | USA | 11 | 9  | 19 | 3 | 17 | 7 | ?  | 15 | 8  | 11 | 6 | 8  |
| US06GEMI33   | US2 | Malus x domestica | McIntosh      | USA | 11 | 10 | ?  | 2 | 15 | 7 | 5  | 7  | 11 | 3  | 7 | 2  |
| US06GEMI36   | US2 | Malus x domestica | McIntosh      | USA | 3  | 2  | 17 | 2 | 7  | 7 | 8  | 5  | 8  | 6  | 7 | 2  |
| US06GEMI39   | US2 | Malus x domestica | McIntosh      | USA | 11 | 9  | 19 | 2 | 14 | 9 | 8  | 4  | 5  | 9  | 4 | 2  |
| US06GEMI4    | US2 | Malus x domestica | McIntosh      | USA | 11 | 9  | 20 | 2 | 8  | 7 | 9  | 4  | 5  | 9  | 4 | 8  |
| US06GEMI40   | US2 | Malus x domestica | McIntosh      | USA | 3  | 9  | ?  | 2 | 14 | 7 | 8  | 10 | 5  | 11 | 4 | 2  |
| US06GEMI5    | US2 | Malus x domestica | McIntosh      | USA | 3  | 9  | 17 | 2 | 2  | 9 | 8  | 5  | 8  | 14 | 6 | 8  |
| US06GEMI8    | US2 | Malus x domestica | McIntosh      | USA | 12 | 10 | 10 | 2 | 17 | 7 | 9  | 4  | 8  | 11 | 6 | 2  |
| US06GEMI9    | US2 | Malus x domestica | McIntosh      | USA | 13 | 9  | 16 | 2 | 13 | 7 | 16 | 4  | 5  | 3  | 6 | 8  |
| US06INRD1    | US3 | Malus x domestica | Red Delicious | USA | ?  | ?  | 11 | ? | 6  | 7 | 10 | 6  | 8  | 9  | 6 | 7  |
| US06INRD11   | US3 | Malus x domestica | Red Delicious | USA | 3  | 9  | 11 | 2 | 21 | 7 | 8  | 7  | 2  | 6  | 6 | 9  |
| US06INRD14   | US3 | Malus x domestica | Red Delicious | USA | 11 | 10 | 9  | 2 | 17 | 7 | ?  | 5  | 5  | 10 | 4 | 9  |
| US06INRD16   | US3 | Malus x domestica | Red Delicious | USA | 20 | ?  | 11 | 2 | 17 | 9 | 6  | 4  | 8  | 9  | 6 | 8  |
| US06INRD17   | US3 | Malus x domestica | Red Delicious | USA | 11 | 9  | 3  | 2 | 2  | 7 | ?  | 5  | 2  | 10 | 4 | 9  |
| US06INRD18   | US3 | Malus x domestica | Red Delicious | USA | ?  | 13 | 21 | 3 | 14 | 7 | 6  | 8  | 11 | 7  | 6 | 10 |
| US06INRD19   | US3 | Malus x domestica | Red Delicious | USA | 11 | 9  | 12 | 3 | 14 | 7 | 8  | 7  | 5  | 9  | 6 | 2  |
| US06INRD2    | US3 | Malus x domestica | Red Delicious | USA | 11 | 9  | 11 | 2 | 18 | 7 | ?  | 8  | 8  | 10 | 4 | 2  |
| US06INRD20   | US3 | Malus x domestica | Red Delicious | USA | ?  | 9  | 11 | 2 | 2  | 7 | 10 | 4  | 5  | 3  | 6 | 2  |
| US06INRD23   | US3 | Malus x domestica | Red Delicious | USA | 12 | 9  | 11 | 2 | 4  | 7 | 8  | 5  | 8  | 3  | 6 | 9  |
| US06INRD25   | US3 | Malus x domestica | Red Delicious | USA | 12 | 10 | 11 | 3 | 14 | 7 | 10 | 15 | 8  | 3  | 6 | 9  |
| US06INRD27   | US3 | Malus x domestica | Red Delicious | USA | 11 | 9  | 3  | 2 | 2  | 7 | 10 | 6  | 11 | 3  | 4 | 10 |
| US06INRD28   | US3 | Malus x domestica | Red Delicious | USA | 12 | 9  | 11 | 2 | 13 | 7 | 9  | 8  | 8  | 3  | 4 | 10 |
| US06INRD29   | US3 | Malus x domestica | Red Delicious | USA | 11 | 3  | ?  | 2 | ?  | 7 | 8  | 8  | 8  | 3  | 4 | 8  |
| US06INRD3    | US3 | Malus x domestica | Red Delicious | USA | 11 | 9  | 11 | 2 | ?  | 7 | 8  | 5  | 8  | 5  | 6 | 7  |
| US06INRD30   | US3 | Malus x domestica | Red Delicious | USA | 11 | 9  | 3  | 3 | 14 | 7 | 9  | 4  | 8  | 3  | 6 | 7  |
| US06INRD31.2 | US3 | Malus x domestica | Red Delicious | USA | ?  | 9  | 3  | 3 | 15 | 7 | 7  | 5  | 8  | 10 | 6 | 8  |
| US06INRD32.2 | US3 | Malus x domestica | Red Delicious | USA | 12 | 9  | ?  | 2 | 14 | 7 | 8  | 5  | 8  | 10 | 6 | 2  |
| US06INRD33   | US3 | Malus x domestica | Red Delicious | USA | 12 | 10 | 16 | 2 | 2  | 7 | 8  | 7  | 8  | 10 | 6 | 7  |
| US06INRD34.2 | US3 | Malus x domestica | Red Delicious | USA | ?  | 9  | ?  | 2 | 17 | 7 | 10 | 8  | 8  | 10 | 6 | 2  |
| US06INRD37   | US3 | Malus x domestica | Red Delicious | USA | 11 | 10 | 11 | 2 | 14 | 7 | 10 | 7  | 5  | 3  | 6 | 8  |
| US06INRD38   | US3 | Malus x domestica | Red Delicious | USA | 11 | 10 | 11 | 2 | 12 | 7 | 8  | 4  | 5  | 10 | 6 | 8  |
| US06INRD42   | US3 | Malus x domestica | Red Delicious | USA | 11 | 10 | ?  | 2 | 17 | 9 | 8  | 5  | 11 | 3  | 6 | 7  |
| US06INRD43   | US3 | Malus x domestica | Red Delicious | USA | 11 | 9  | 2  | 2 | 16 | 7 | 8  | 6  | 8  | 6  | 6 | 2  |
| US06INRD45   | US3 | Malus x domestica | Red Delicious | USA | 11 | 9  | 2  | 2 | 14 | 6 | 8  | 5  | 5  | 18 | 6 | 9  |
| US06INRD5    | US3 | Malus x domestica | Red Delicious | USA | 11 | 9  | 11 | 2 | ?  | 7 | 16 | 4  | 5  | 10 | 6 | 2  |

|             |     |                   |               |        |    |   |    |   |    |   |    |    |    |    |   |    |
|-------------|-----|-------------------|---------------|--------|----|---|----|---|----|---|----|----|----|----|---|----|
| US06INRD6   | US3 | Malus x domestica | Red Delicious | USA    | 11 | 9 | 11 | 2 | 14 | 7 | 11 | 5  | 5  | 3  | 6 | 10 |
| US06INRD7   | US3 | Malus x domestica | Red Delicious | USA    | 3  | 9 | ?  | 3 | 6  | 7 | 10 | 4  | 8  | 10 | 6 | 2  |
| US06INRD9.2 | US3 | Malus x domestica | Red Delicious | USA    | 11 | 8 | 13 | 2 | 17 | 7 | 7  | 5  | 2  | 9  | 6 | 9  |
| US06KYGA1   | US4 | Malus x domestica | Royal Gala    | USA    | 11 | 6 | 18 | 2 | 11 | 7 | 9  | 7  | 5  | 10 | 6 | 2  |
| US06KYGA10  | US4 | Malus x domestica | Royal Gala    | USA    | 3  | 9 | 19 | 2 | 14 | 9 | 10 | 8  | 8  | 14 | 3 | 2  |
| US06KYGA11  | US4 | Malus x domestica | Royal Gala    | USA    | 11 | 9 | 7  | 2 | 14 | 9 | ?  | 4  | 14 | 9  | 4 | 2  |
| US06KYGA12  | US4 | Malus x domestica | Royal Gala    | USA    | 3  | 9 | 11 | 2 | 7  | 9 | 9  | 15 | 5  | 6  | 6 | 10 |
| US06KYGA13  | US4 | Malus x domestica | Royal Gala    | USA    | 12 | 9 | 3  | 2 | 18 | 7 | 18 | 7  | 14 | 9  | 6 | 8  |
| US06KYGA14  | US4 | Malus x domestica | Royal Gala    | USA    | 11 | 9 | 17 | 2 | 14 | 7 | ?  | 10 | 5  | 6  | 4 | 8  |
| US06KYGA16  | US4 | Malus x domestica | Royal Gala    | USA    | 3  | 9 | 10 | 3 | 13 | 7 | 9  | 8  | 8  | 8  | 6 | 8  |
| US06KYGA17  | US4 | Malus x domestica | Royal Gala    | USA    | 12 | 9 | 17 | 2 | 16 | 6 | ?  | 4  | 5  | 15 | 6 | 2  |
| US06KYGA18  | US4 | Malus x domestica | Royal Gala    | USA    | 11 | 9 | 22 | 2 | 13 | 7 | 10 | 4  | 8  | 18 | 3 | 10 |
| US06KYGA19  | US4 | Malus x domestica | Royal Gala    | USA    | 11 | 9 | 10 | 2 | 17 | 7 | ?  | 10 | 5  | 6  | 6 | 8  |
| US06KYGA2   | US4 | Malus x domestica | Royal Gala    | USA    | 12 | 9 | 17 | 2 | 15 | 7 | 13 | 7  | 12 | 10 | 6 | 2  |
| US06KYGA20  | US4 | Malus x domestica | Royal Gala    | USA    | 11 | 9 | 28 | 2 | 14 | 7 | ?  | 8  | 5  | 10 | 6 | 2  |
| US06KYGA21  | US4 | Malus x domestica | Royal Gala    | USA    | 11 | 9 | 7  | 2 | 16 | 7 | ?  | 6  | 5  | 10 | 6 | 2  |
| US06KYGA22  | US4 | Malus x domestica | Royal Gala    | USA    | 13 | 9 | ?  | 2 | 6  | 7 | ?  | 6  | 8  | 10 | 6 | 8  |
| US06KYGA23  | US4 | Malus x domestica | Royal Gala    | USA    | 3  | 8 | 10 | 2 | 14 | 7 | 8  | 5  | 8  | 10 | 4 | 2  |
| US06KYGA24  | US4 | Malus x domestica | Royal Gala    | USA    | 3  | 9 | 10 | 2 | 14 | 7 | 7  | 6  | 5  | 10 | 7 | 2  |
| US06KYGA25  | US4 | Malus x domestica | Royal Gala    | USA    | 12 | 9 | 11 | 2 | 17 | 9 | ?  | 15 | 16 | 14 | 6 | 8  |
| US06KYGA26  | US4 | Malus x domestica | Royal Gala    | USA    | 3  | 9 | ?  | 2 | 6  | 7 | 10 | 7  | 5  | 12 | 6 | 2  |
| US06KYGA28  | US4 | Malus x domestica | Royal Gala    | USA    | 3  | 9 | 11 | 2 | 7  | 7 | 7  | 8  | 5  | 12 | 6 | 7  |
| US06KYGA29  | US4 | Malus x domestica | Royal Gala    | USA    | 12 | 9 | ?  | 2 | 18 | 9 | ?  | 7  | 5  | 11 | 6 | 8  |
| US06KYGA3   | US4 | Malus x domestica | Royal Gala    | USA    | 3  | 9 | ?  | 2 | 14 | 9 | 10 | 8  | 8  | 9  | 3 | 7  |
| US06KYGA30  | US4 | Malus x domestica | Royal Gala    | USA    | 11 | 8 | 10 | 2 | 16 | 7 | ?  | 10 | 5  | 8  | 6 | 2  |
| US06KYGA31  | US4 | Malus x domestica | Royal Gala    | USA    | 12 | 9 | 11 | 2 | 2  | 7 | 6  | 7  | 17 | 6  | 6 | 12 |
| US06KYGA33  | US4 | Malus x domestica | Royal Gala    | USA    | 11 | 9 | 11 | 2 | 14 | 7 | ?  | 16 | 5  | 10 | 4 | 2  |
| US06KYGA34  | US4 | Malus x domestica | Royal Gala    | USA    | 3  | 9 | ?  | 2 | 6  | 7 | 10 | 4  | 5  | 5  | 6 | 8  |
| US06KYGA35  | US4 | Malus x domestica | Royal Gala    | USA    | 3  | 9 | 2  | 2 | 7  | 7 | ?  | 15 | 5  | 14 | 6 | 7  |
| US06KYGA38  | US4 | Malus x domestica | Royal Gala    | USA    | 3  | 9 | 7  | 2 | 15 | ? | 7  | ?  | 5  | 12 | ? | 7  |
| US06KYGA4   | US4 | Malus x domestica | Royal Gala    | USA    | 11 | 9 | ?  | 3 | 14 | 7 | 10 | 6  | 5  | 11 | 6 | 7  |
| US06KYGA40  | US4 | Malus x domestica | Royal Gala    | USA    | 11 | 9 | 4  | 2 | 14 | ? | 10 | ?  | 8  | 5  | ? | 8  |
| US06KYGA5   | US4 | Malus x domestica | Royal Gala    | USA    | 11 | 9 | 19 | 2 | ?  | 7 | 9  | 7  | 5  | 10 | 6 | 7  |
| US06KYGA7   | US4 | Malus x domestica | Royal Gala    | USA    | 12 | 9 | 18 | 2 | 14 | 7 | 8  | 4  | 5  | 10 | 4 | 7  |
| US06KYGA8   | US4 | Malus x domestica | Royal Gala    | USA    | 11 | 9 | 6  | 2 | 18 | 9 | 7  | 7  | 15 | 9  | 6 | 8  |
| US06KYGA9   | US4 | Malus x domestica | Royal Gala    | USA    | 11 | 9 | 8  | 2 | 14 | 7 | 8  | 8  | 5  | 12 | 6 | 8  |
| #153G1      | CA  | Malus x domestica | xxx           | Canada | 11 | 9 | ?  | 2 | 6  | 7 | 8  | 5  | 8  | 10 | 6 | 8  |
| #169G1      | CA  | Malus x domestica | xxx           | Canada | 13 | 9 | 8  | 2 | 14 | 6 | 8  | 5  | 8  | 10 | 6 | 2  |
| #183G1      | CA  | Malus x domestica | xxx           | Canada | 12 | 9 | ?  | 2 | 7  | 9 | 10 | 8  | 8  | 3  | 6 | 2  |
| #224G1      | CA  | Malus x domestica | xxx           | Canada | 12 | 9 | ?  | 2 | 7  | 7 | 8  | 5  | 8  | ?  | 6 | 7  |
| #225G1      | CA  | Malus x domestica | xxx           | Canada | 11 | 9 | ?  | 3 | 6  | 7 | 8  | 8  | 8  | 6  | 6 | 7  |

|                 |     |                   |                  |        |    |    |    |   |    |    |    |   |    |    |   |    |
|-----------------|-----|-------------------|------------------|--------|----|----|----|---|----|----|----|---|----|----|---|----|
| #225G1          | CA  | Malus x domestica | xxx              | Canada | 12 | 9  | 11 | 3 | 6  | 9  | 10 | 5 | 5  | 10 | 6 | 7  |
| #236G2          | CA  | Malus x domestica | xxx              | Canada | 12 | 9  | 30 | 2 | 7  | 9  | 8  | 5 | 8  | 15 | 6 | 2  |
| #258G2          | CA  | Malus x domestica | xxx              | Canada | 16 | 9  | 18 | 2 | 14 | 7  | 8  | 5 | 19 | 5  | 7 | 2  |
| #380G1          | CA  | Malus x domestica | xxx              | Canada | 11 | 9  | 11 | 2 | 10 | 7  | 8  | 7 | 8  | 9  | 6 | 2  |
| #427G2          | CA  | Malus x domestica | xxx              | Canada | ?  | 9  | 14 | 2 | 17 | 9  | 18 | 8 | 8  | 10 | 6 | 8  |
| C1              | CA  | Malus x domestica | xxx              | Canada | 11 | 9  | 7  | 2 | 14 | 10 | 8  | 7 | 8  | 9  | 6 | 2  |
| C3              | CA  | Malus x domestica | xxx              | Canada | 12 | 9  | 14 | 2 | 14 | 9  | 7  | 4 | 5  | 3  | 6 | 2  |
| C4              | CA  | Malus x domestica | xxx              | Canada | 11 | 9  | ?  | 2 | 7  | 7  | 8  | 5 | 8  | 10 | 6 | 8  |
| E1              | CA  | Malus x domestica | xxx              | Canada | 12 | 20 | 9  | 2 | ?  | 9  | ?  | 5 | 8  | ?  | 6 | 2  |
| E2              | CA  | Malus x domestica | xxx              | Canada | 12 | 9  | 11 | 2 | 7  | 7  | 8  | 5 | 5  | 3  | 4 | 8  |
| E3              | CA  | Malus x domestica | xxx              | Canada | 11 | 9  | 12 | 2 | 15 | 7  | 8  | 8 | 5  | 5  | 4 | 8  |
| E4              | CA  | Malus x domestica | xxx              | Canada | 11 | 9  | 12 | 2 | 15 | ?  | 10 | 8 | 5  | 5  | 4 | 8  |
| E5              | CA  | Malus x domestica | xxx              | Canada | 11 | 9  | 12 | 2 | 15 | 7  | 8  | 8 | 5  | 5  | 4 | 8  |
| Gd1             | CA  | Malus x domestica | xxx              | Canada | 11 | 9  | ?  | 3 | 7  | 9  | 8  | 5 | 8  | 10 | 7 | 2  |
| Gd2             | CA  | Malus x domestica | xxx              | Canada | 11 | 9  | 13 | 3 | 7  | 9  | 8  | 5 | 8  | 10 | 7 | 2  |
| Gd3             | CA  | Malus x domestica | xxx              | Canada | 11 | 9  | ?  | 3 | 7  | 9  | 8  | 5 | 8  | 10 | 6 | 2  |
| Gg1             | CA  | Malus x domestica | xxx              | Canada | ?  | 9  | 9  | 2 | 8  | 9  | 10 | 5 | 8  | 10 | 6 | 2  |
| Gg2             | CA  | Malus x domestica | xxx              | Canada | 3  | 9  | 18 | 2 | 14 | 7  | 8  | 7 | 8  | 15 | 6 | 2  |
| Gg3             | CA  | Malus x domestica | xxx              | Canada | 3  | 9  | 12 | 2 | 7  | 7  | 18 | 4 | 8  | 10 | 6 | 2  |
| Gg4             | CA  | Malus x domestica | xxx              | Canada | 11 | 9  | 18 | 2 | 7  | 7  | 9  | 8 | ?  | 9  | 4 | 8  |
| Gg5             | CA  | Malus x domestica | xxx              | Canada | ?  | 9  | 9  | 2 | 8  | 9  | 10 | 5 | 8  | 10 | 6 | 2  |
| Gg6             | CA  | Malus x domestica | xxx              | Canada | 11 | 9  | 18 | 2 | 7  | 7  | 9  | ? | ?  | 9  | 4 | 8  |
| Gg7             | CA  | Malus x domestica | xxx              | Canada | 12 | 9  | 8  | 2 | 7  | 9  | ?  | 4 | 2  | 10 | 6 | 7  |
| Pa2             | CA  | Malus x domestica | xxx              | Canada | 5  | 9  | 6  | 2 | 14 | 7  | 18 | 7 | 6  | 11 | 7 | 2  |
| Pa3             | CA  | Malus x domestica | xxx              | Canada | 12 | 9  | ?  | 2 | 6  | 7  | 8  | 5 | 8  | ?  | 6 | 8  |
| Pa4             | CA  | Malus x domestica | xxx              | Canada | 15 | 9  | 12 | 2 | 17 | 9  | 9  | 5 | 8  | 6  | 6 | 2  |
| Pa5             | CA  | Malus x domestica | xxx              | Canada | 15 | 9  | 12 | 2 | 17 | 9  | 9  | 5 | 8  | 6  | 6 | 2  |
| S1              | CA  | Malus x domestica | xxx              | Canada | 12 | 9  | 11 | 2 | 6  | 7  | 8  | 5 | 5  | ?  | 4 | 7  |
| S2              | CA  | Malus x domestica | xxx              | Canada | 11 | 9  | 8  | 3 | 7  | 7  | ?  | 5 | 5  | 10 | 4 | 8  |
| BR04GoldenF1L1  | BR1 | Malus x domestica | Golden Delicious | Brazil | 12 | 9  | 15 | 2 | 7  | 6  | 9  | 8 | 8  | 3  | 6 | 9  |
| BR04GoldenF10L1 | BR1 | Malus x domestica | Golden Delicious | Brazil | 12 | ?  | 15 | 3 | 9  | 7  | 8  | 5 | 5  | 3  | 6 | 9  |
| BR04GoldenF11L1 | BR1 | Malus x domestica | Golden Delicious | Brazil | 12 | 9  | 15 | 2 | ?  | 7  | 9  | 8 | 8  | 3  | 6 | 1  |
| BR04GoldenF12L1 | BR1 | Malus x domestica | Golden Delicious | Brazil | 12 | 9  | 15 | 2 | 8  | 7  | 9  | 7 | 8  | 9  | 6 | ?  |
| BR04GoldenF13L1 | BR1 | Malus x domestica | Golden Delicious | Brazil | 11 | 9  | 15 | 2 | 9  | 7  | 9  | 7 | 5  | 3  | 6 | ?  |
| BR04GoldenF14L1 | BR1 | Malus x domestica | Golden Delicious | Brazil | 12 | 14 | 15 | 2 | ?  | 7  | 9  | 7 | 5  | ?  | 4 | 6  |
| BR04GoldenF15L1 | BR1 | Malus x domestica | Golden Delicious | Brazil | 12 | 9  | 17 | 2 | ?  | 7  | 9  | 4 | 8  | ?  | 6 | 8  |
| BR04GoldenF16L1 | BR1 | Malus x domestica | Golden Delicious | Brazil | 12 | 9  | 15 | 2 | 8  | 7  | 10 | 7 | 8  | 3  | 6 | 8  |
| BR04GoldenF17L1 | BR1 | Malus x domestica | Golden Delicious | Brazil | 12 | 9  | 15 | 2 | 8  | 7  | 10 | 7 | 8  | 8  | 6 | 8  |
| BR04GoldenF18L1 | BR1 | Malus x domestica | Golden Delicious | Brazil | 12 | 9  | 17 | 2 | 7  | 7  | 6  | 5 | 8  | 3  | 6 | 8  |
| BR04GoldenF19L1 | BR1 | Malus x domestica | Golden Delicious | Brazil | 12 | ?  | 16 | 3 | 8  | 7  | 9  | 7 | 8  | 13 | 6 | 10 |
| BR04GoldenF2L1  | BR1 | Malus x domestica | Golden Delicious | Brazil | 12 | 9  | 15 | 2 | 7  | 7  | 9  | 5 | 5  | 3  | 5 | 7  |



|                 |     |                   |                  |        |    |    |    |   |    |    |    |    |   |    |   |    |
|-----------------|-----|-------------------|------------------|--------|----|----|----|---|----|----|----|----|---|----|---|----|
| BR04GoldenF20L1 | BR1 | Malus x domestica | Golden Delicious | Brazil | 12 | 9  | 15 | 2 | 7  | 7  | 9  | 7  | 5 | 3  | 6 | 9  |
| BR04GoldenF21L1 | BR1 | Malus x domestica | Golden Delicious | Brazil | 12 | 9  | ?  | 2 | 7  | 7  | 9  | 6  | 8 | 13 | 6 | 7  |
| BR04GoldenF22L1 | BR1 | Malus x domestica | Golden Delicious | Brazil | 12 | 9  | 15 | 2 | ?  | 7  | 9  | 7  | 8 | ?  | 6 | 7  |
| BR04GoldenF23L1 | BR1 | Malus x domestica | Golden Delicious | Brazil | 12 | 14 | 16 | 3 | ?  | 6  | 7  | 5  | 5 | ?  | 5 | ?  |
| BR04GoldenF3L1  | BR1 | Malus x domestica | Golden Delicious | Brazil | 12 | 10 | 15 | 2 | 7  | 9  | 9  | 7  | 5 | 3  | 5 | 8  |
| BR04GoldenF4L1  | BR1 | Malus x domestica | Golden Delicious | Brazil | 12 | ?  | 15 | 2 | 6  | 7  | 10 | 7  | 5 | 3  | 5 | 8  |
| BR04GoldenF5L1  | BR1 | Malus x domestica | Golden Delicious | Brazil | 12 | 9  | 15 | 2 | 7  | 7  | 9  | 5  | 8 | 10 | 6 | 7  |
| BR04GoldenF6L1  | BR1 | Malus x domestica | Golden Delicious | Brazil | 12 | 9  | 15 | 2 | ?  | 6  | 9  | 6  | 8 | ?  | 6 | 8  |
| BR04GoldenF7L1  | BR1 | Malus x domestica | Golden Delicious | Brazil | 12 | ?  | 17 | 2 | ?  | 6  | 9  | 5  | 8 | ?  | 6 | 7  |
| BR04GoldenF8L1  | BR1 | Malus x domestica | Golden Delicious | Brazil | 12 | 9  | 11 | 2 | 9  | 7  | 10 | 7  | 8 | 9  | 6 | 8  |
| BR04GoldenF9L1  | BR1 | Malus x domestica | Golden Delicious | Brazil | 12 | 9  | 16 | 2 | 7  | 9  | 11 | 5  | 8 | 3  | 6 | 8  |
| BRE04Gold1c     | BR1 | Malus x domestica | Golden Delicious | Brazil | 12 | 14 | 14 | 2 | 13 | 7  | 9  | 7  | 8 | 13 | 5 | 8  |
| BRE04Gold2c     | BR1 | Malus x domestica | Golden Delicious | Brazil | 12 | 14 | 14 | 3 | 7  | 7  | 9  | 7  | 5 | 13 | 4 | 8  |
| BRE04Gold6b     | BR1 | Malus x domestica | Golden Delicious | Brazil | 13 | 9  | 15 | 1 | 6  | 5  | 7  | 11 | 8 | 3  | 5 | 6  |
| BRE04Gold8b     | BR1 | Malus x domestica | Golden Delicious | Brazil | 3  | 14 | 18 | 2 | 7  | 7  | 14 | 5  | 8 | 12 | 6 | 8  |
| BRE04Gold9b     | BR1 | Malus x domestica | Golden Delicious | Brazil | 13 | 9  | 17 | 2 | 6  | 7  | 9  | 6  | 5 | 13 | 6 | 8  |
| BR04BGCA11      | BR2 | Malus x domestica | Belgolden        | Brazil | ?  | 9  | 15 | ? | 6  | 6  | 14 | 7  | 5 | 10 | 6 | 8  |
| BR04BGCA12      | BR2 | Malus x domestica | Belgolden        | Brazil | 11 | 2  | 15 | ? | 6  | 7  | 14 | 7  | 8 | 9  | 6 | 8  |
| BR04BGCA13      | BR2 | Malus x domestica | Belgolden        | Brazil | 12 | 2  | 15 | ? | 6  | 7  | 10 | 5  | 5 | 10 | 5 | 8  |
| BR04BGCA14      | BR2 | Malus x domestica | Belgolden        | Brazil | ?  | 9  | 15 | ? | 6  | 6  | 9  | 6  | 8 | 9  | 6 | 8  |
| BR04BGCA15      | BR2 | Malus x domestica | Belgolden        | Brazil | ?  | 9  | 15 | 2 | 7  | 7  | 10 | 5  | 8 | 10 | 7 | 8  |
| BR04BGCA16      | BR2 | Malus x domestica | Belgolden        | Brazil | 12 | 10 | 15 | 3 | 6  | 7  | 10 | 5  | 8 | 8  | 6 | 8  |
| BR04BGCA17      | BR2 | Malus x domestica | Belgolden        | Brazil | 13 | 9  | 16 | 2 | 6  | 7  | ?  | 7  | 5 | 13 | 6 | 8  |
| BR04BGCA18      | BR2 | Malus x domestica | Belgolden        | Brazil | 12 | 9  | 27 | ? | 6  | 7  | 10 | 7  | 5 | 9  | 5 | 8  |
| BR04BGCA19      | BR2 | Malus x domestica | Belgolden        | Brazil | 12 | 9  | 17 | 3 | 6  | 9  | ?  | 5  | 8 | 8  | 7 | 8  |
| BR04BGCA2       | BR2 | Malus x domestica | Belgolden        | Brazil | 11 | 9  | 17 | ? | 9  | 7  | 10 | 5  | 5 | 10 | 6 | 8  |
| BR04BGCA20      | BR2 | Malus x domestica | Belgolden        | Brazil | 11 | 9  | 17 | 2 | 9  | 7  | 10 | 5  | 5 | 3  | 6 | 8  |
| BR04BGCA21      | BR2 | Malus x domestica | Belgolden        | Brazil | 13 | 2  | 15 | 2 | 6  | 9  | 14 | 5  | 8 | 8  | 6 | 8  |
| BR04BGCA22      | BR2 | Malus x domestica | Belgolden        | Brazil | 12 | 2  | 15 | 2 | 6  | 12 | 9  | 6  | 5 | 8  | 7 | 8  |
| BR04BGCA23      | BR2 | Malus x domestica | Belgolden        | Brazil | 12 | 9  | ?  | ? | 7  | 7  | 9  | 5  | 8 | 10 | 7 | 12 |
| BR04BGCA24      | BR2 | Malus x domestica | Belgolden        | Brazil | ?  | 10 | 17 | ? | 6  | 7  | 10 | 5  | 5 | 3  | 5 | 8  |
| BR04BGCA25      | BR2 | Malus x domestica | Belgolden        | Brazil | 12 | 9  | 18 | ? | 7  | 7  | 10 | 5  | 8 | 10 | 6 | 8  |
| BR04BGCA26      | BR2 | Malus x domestica | Belgolden        | Brazil | 12 | 13 | 19 | 3 | 6  | 9  | 3  | 5  | 5 | 13 | 5 | 8  |
| BR04BGCA27      | BR2 | Malus x domestica | Belgolden        | Brazil | 12 | 9  | 15 | 3 | 6  | 12 | 12 | 7  | 5 | 9  | 5 | 8  |
| BR04BGCA28      | BR2 | Malus x domestica | Belgolden        | Brazil | 12 | 9  | 27 | 2 | 6  | 6  | 9  | 5  | 8 | 8  | 6 | 8  |
| BR04BGCA29      | BR2 | Malus x domestica | Belgolden        | Brazil | 12 | 9  | 21 | 2 | 6  | 7  | 8  | 7  | 5 | 13 | 6 | 8  |
| BR04BGCA3       | BR2 | Malus x domestica | Belgolden        | Brazil | 12 | 9  | 15 | 2 | 6  | 7  | 10 | 6  | 5 | 8  | 5 | 8  |
| BR04BGCA30      | BR2 | Malus x domestica | Belgolden        | Brazil | 12 | 9  | 21 | 2 | 6  | 12 | ?  | 5  | 5 | 13 | 5 | 7  |
| BR04BGCA31      | BR2 | Malus x domestica | Belgolden        | Brazil | 3  | 2  | 17 | 3 | 6  | 7  | ?  | 5  | 8 | 11 | 7 | 8  |
| BR04BGCA32      | BR2 | Malus x domestica | Belgolden        | Brazil | 13 | 9  | ?  | 2 | 7  | 7  | 9  | 6  | 8 | 3  | 6 | 8  |
| BR04BGCA33      | BR2 | Malus x domestica | Belgolden        | Brazil | 12 | 10 | 15 | 2 | 6  | 7  | 9  | 5  | 8 | 10 | 6 | 8  |

|              |     |                   |            |        |    |    |    |   |    |    |    |   |   |    |   |   |
|--------------|-----|-------------------|------------|--------|----|----|----|---|----|----|----|---|---|----|---|---|
| BR04BGCA34   | BR2 | Malus x domestica | Belgolden  | Brazil | 12 | 9  | 17 | 2 | 6  | 9  | ?  | 7 | 8 | 8  | 6 | 8 |
| BR04BGCA35   | BR2 | Malus x domestica | Belgolden  | Brazil | 13 | 2  | ?  | 2 | 7  | 7  | 10 | 5 | 8 | 10 | 6 | 8 |
| BR04BGCA36   | BR2 | Malus x domestica | Belgolden  | Brazil | 12 | 9  | 13 | 2 | 6  | 7  | 14 | 6 | 5 | 13 | 4 | 8 |
| BR04BGCA37   | BR2 | Malus x domestica | Belgolden  | Brazil | 12 | 15 | 15 | ? | 8  | 6  | 9  | 7 | 8 | 8  | 6 | 8 |
| BR04BGCA38   | BR2 | Malus x domestica | Belgolden  | Brazil | 12 | 14 | 16 | 3 | 6  | 11 | 9  | 7 | 5 | 3  | 5 | 8 |
| BR04BGCA39   | BR2 | Malus x domestica | Belgolden  | Brazil | 12 | 2  | 15 | 2 | 7  | 7  | 8  | 5 | 5 | 13 | 4 | 8 |
| BR04BGCA4    | BR2 | Malus x domestica | Belgolden  | Brazil | 13 | 9  | 15 | 2 | 13 | 11 | 14 | 7 | 5 | 8  | 6 | 8 |
| BR04BGCA40   | BR2 | Malus x domestica | Belgolden  | Brazil | 12 | 9  | 15 | 3 | 7  | 9  | 9  | 7 | 8 | 9  | 4 | 8 |
| BR04BGCA41   | BR2 | Malus x domestica | Belgolden  | Brazil | 11 | 2  | ?  | 1 | 7  | 7  | ?  | 6 | 5 | 10 | 4 | 8 |
| BR04BGCA5    | BR2 | Malus x domestica | Belgolden  | Brazil | 12 | 9  | 15 | 2 | 6  | 11 | 9  | 5 | 5 | 9  | 5 | 8 |
| BR04BGCA6    | BR2 | Malus x domestica | Belgolden  | Brazil | 3  | ?  | 16 | 2 | 9  | 7  | 9  | 5 | 8 | 8  | 6 | 8 |
| BR04BGCA7    | BR2 | Malus x domestica | Belgolden  | Brazil | 3  | ?  | 15 | ? | 8  | 7  | 10 | 6 | 5 | 10 | 4 | ? |
| BR04BGCA8    | BR2 | Malus x domestica | Belgolden  | Brazil | 3  | 2  | 15 | 2 | 6  | 9  | 9  | 5 | 5 | 3  | 5 | 8 |
| BR04BGCA9    | BR2 | Malus x domestica | Belgolden  | Brazil | 13 | 2  | 17 | 2 | 6  | 6  | ?  | 6 | 8 | 9  | 6 | 8 |
| BR04GAV31    | BR3 | Malus x domestica | Royal Gala | Brazil | 12 | 10 | 24 | 2 | 7  | 9  | 9  | 5 | 8 | 9  | 6 | 8 |
| BR04GAV310   | BR3 | Malus x domestica | Royal Gala | Brazil | 12 | 9  | 15 | 3 | 7  | 7  | 9  | 7 | 5 | 9  | 5 | ? |
| BR04GAV311   | BR3 | Malus x domestica | Royal Gala | Brazil | 12 | 10 | 15 | 2 | 16 | 5  | 8  | 6 | 5 | 11 | 5 | 8 |
| BR04GAV312   | BR3 | Malus x domestica | Royal Gala | Brazil | 12 | 2  | 19 | 3 | 14 | 7  | ?  | 7 | 8 | 3  | 6 | 8 |
| BR04GAV313   | BR3 | Malus x domestica | Royal Gala | Brazil | 3  | 2  | ?  | 2 | 6  | 7  | 10 | 5 | 5 | 3  | 5 | 8 |
| BR04GAV314   | BR3 | Malus x domestica | Royal Gala | Brazil | 12 | 2  | ?  | 2 | 7  | 7  | ?  | 6 | 5 | 13 | 5 | 8 |
| BR04GAV315   | BR3 | Malus x domestica | Royal Gala | Brazil | 12 | 10 | 23 | 3 | 6  | 5  | 9  | 8 | 8 | 8  | 5 | 8 |
| BR04GAV316   | BR3 | Malus x domestica | Royal Gala | Brazil | 12 | 9  | ?  | 2 | 6  | 7  | 9  | 4 | 5 | 9  | 5 | 8 |
| BR04GAV317   | BR3 | Malus x domestica | Royal Gala | Brazil | 5  | 9  | 15 | 3 | 7  | 7  | 14 | 7 | 5 | 13 | 5 | 8 |
| BR04GAV318   | BR3 | Malus x domestica | Royal Gala | Brazil | 12 | ?  | ?  | 3 | 9  | 7  | 9  | 5 | 8 | 8  | 6 | 8 |
| BR04GAV319   | BR3 | Malus x domestica | Royal Gala | Brazil | 12 | 2  | 15 | 2 | 6  | 9  | ?  | 7 | 5 | 10 | 6 | 8 |
| BR04GAV32    | BR3 | Malus x domestica | Royal Gala | Brazil | 12 | 9  | 16 | 3 | 7  | 7  | 11 | 4 | 8 | 8  | 6 | 8 |
| BR04GAV320   | BR3 | Malus x domestica | Royal Gala | Brazil | 3  | 10 | 15 | 3 | 10 | 7  | 9  | 7 | 8 | 3  | 6 | 8 |
| BR04GAV321   | BR3 | Malus x domestica | Royal Gala | Brazil | 11 | 9  | 19 | 3 | 7  | 6  | 9  | 5 | 5 | 13 | 5 | 8 |
| BR04GAV322   | BR3 | Malus x domestica | Royal Gala | Brazil | 12 | 10 | 16 | 3 | 8  | 6  | 9  | 7 | 5 | 14 | 7 | 8 |
| BR04GAV323.1 | BR3 | Malus x domestica | Royal Gala | Brazil | 12 | 9  | 20 | 2 | 9  | 5  | ?  | 5 | 5 | 13 | 4 | 8 |
| BR04GAV323.2 | BR3 | Malus x domestica | Royal Gala | Brazil | 12 | 9  | 15 | 3 | 7  | 9  | 9  | 4 | 5 | 12 | 6 | 8 |
| BR04GAV324   | BR3 | Malus x domestica | Royal Gala | Brazil | 12 | 14 | 14 | 2 | 7  | 7  | 11 | 8 | 8 | 9  | 6 | 8 |
| BR04GAV325.1 | BR3 | Malus x domestica | Royal Gala | Brazil | 12 | ?  | 15 | 2 | 6  | 6  | 10 | 7 | 5 | 8  | 7 | 8 |
| BR04GAV325.2 | BR3 | Malus x domestica | Royal Gala | Brazil | 12 | 14 | 15 | 2 | 7  | 12 | 9  | 8 | 8 | 13 | 6 | 8 |
| BR04GAV326   | BR3 | Malus x domestica | Royal Gala | Brazil | 14 | 10 | 15 | 2 | 7  | 6  | 12 | 5 | 5 | 3  | 6 | 8 |
| BR04GAV327.1 | BR3 | Malus x domestica | Royal Gala | Brazil | 12 | 9  | 14 | 2 | 7  | 7  | 9  | 5 | 8 | 10 | 6 | 8 |
| BR04GAV327.2 | BR3 | Malus x domestica | Royal Gala | Brazil | 12 | 9  | 15 | 2 | 7  | 9  | ?  | 5 | 5 | 3  | 5 | 8 |
| BR04GAV33    | BR3 | Malus x domestica | Royal Gala | Brazil | 12 | 10 | 14 | 3 | 6  | 7  | 9  | 8 | 5 | 13 | 5 | 8 |
| BR04GAV34    | BR3 | Malus x domestica | Royal Gala | Brazil | 12 | 10 | 20 | 2 | 6  | 9  | ?  | 7 | 6 | 13 | 5 | 8 |
| BR04GAV35    | BR3 | Malus x domestica | Royal Gala | Brazil | 13 | 9  | 15 | 3 | 7  | 7  | 9  | 7 | 8 | 9  | 6 | 8 |
| BR04GAV36    | BR3 | Malus x domestica | Royal Gala | Brazil | 12 | 10 | 16 | 2 | 6  | 7  | 9  | 8 | 8 | 3  | 6 | 8 |

|               |     |                   |            |        |    |    |    |   |    |    |    |   |   |    |   |   |
|---------------|-----|-------------------|------------|--------|----|----|----|---|----|----|----|---|---|----|---|---|
| BR04GAV37     | BR3 | Malus x domestica | Royal Gala | Brazil | 13 | 10 | ?  | 2 | 7  | 6  | 9  | 6 | 8 | 9  | 6 | 8 |
| BR04GAV38     | BR3 | Malus x domestica | Royal Gala | Brazil | 12 | 10 | 14 | 2 | 8  | 7  | ?  | 8 | 5 | 3  | 5 | 8 |
| BR04GAV39     | BR3 | Malus x domestica | Royal Gala | Brazil | 11 | 9  | 12 | 2 | 6  | 7  | 11 | 7 | 8 | 8  | 6 | 8 |
| BR04FUjS3.1b  | BR4 | Malus x domestica | Fuji       | Brazil | 12 | 9  | 17 | 2 | 7  | 9  | ?  | 5 | 5 | 9  | 6 | 8 |
| BR04FUjS3.2b  | BR4 | Malus x domestica | Fuji       | Brazil | 12 | 10 | 17 | 3 | 14 | 9  | ?  | 5 | 5 | 13 | 6 | 8 |
| BR04FUjS3.3b  | BR4 | Malus x domestica | Fuji       | Brazil | 12 | 2  | 17 | 3 | ?  | 7  | 9  | 6 | 8 | 10 | 6 | 8 |
| BR04FUjS3.4b  | BR4 | Malus x domestica | Fuji       | Brazil | 5  | 10 | 15 | 2 | ?  | 7  | 9  | 7 | 5 | 9  | 6 | 8 |
| BR04FUjS3.5b  | BR4 | Malus x domestica | Fuji       | Brazil | 12 | 9  | 15 | 2 | 6  | 9  | 10 | 5 | 5 | 3  | 6 | 8 |
| BR04FUjS3.6b  | BR4 | Malus x domestica | Fuji       | Brazil | 12 | 9  | 15 | 2 | 6  | 9  | ?  | 6 | 5 | 13 | 5 | 8 |
| BR04FUjS3.7b  | BR4 | Malus x domestica | Fuji       | Brazil | 13 | 14 | 17 | 2 | 9  | 7  | 10 | 6 | 5 | 8  | 6 | 8 |
| BR04FUjS3.8b  | BR4 | Malus x domestica | Fuji       | Brazil | ?  | 9  | 15 | 2 | 7  | 7  | 9  | ? | 8 | 3  | 6 | 8 |
| BRE04FUJS3.10 | BR4 | Malus x domestica | Fuji       | Brazil | 15 | 9  | 15 | 2 | 7  | 7  | 10 | 7 | 8 | 13 | 6 | 8 |
| BRE04FUJS3.11 | BR4 | Malus x domestica | Fuji       | Brazil | 12 | 14 | 15 | 3 | 7  | 7  | 9  | 6 | 5 | 10 | ? | 8 |
| BRE04FUJS3.12 | BR4 | Malus x domestica | Fuji       | Brazil | 12 | 8  | 14 | 2 | 7  | 9  | 9  | 5 | 8 | 13 | 6 | 8 |
| BRE04FUJS3.13 | BR4 | Malus x domestica | Fuji       | Brazil | 12 | 9  | 15 | 3 | 6  | 6  | 10 | 6 | 5 | 10 | 6 | 8 |
| BRE04FUJS3.14 | BR4 | Malus x domestica | Fuji       | Brazil | 12 | 9  | 18 | 2 | 10 | 6  | 10 | 8 | 8 | 3  | 5 | 8 |
| BRE04FUJS3.15 | BR4 | Malus x domestica | Fuji       | Brazil | 12 | 8  | 16 | ? | 7  | 7  | 9  | 5 | 8 | 10 | 6 | 8 |
| BRE04FUJS3.16 | BR4 | Malus x domestica | Fuji       | Brazil | 3  | 9  | 15 | 2 | 6  | 7  | 9  | 8 | 8 | 3  | 6 | 8 |
| BRE04FUJS3.17 | BR4 | Malus x domestica | Fuji       | Brazil | 12 | 9  | 14 | 2 | 16 | 9  | 14 | 7 | 5 | 13 | 8 | 8 |
| BRE04FUJS3.18 | BR4 | Malus x domestica | Fuji       | Brazil | 12 | 10 | 15 | 1 | 7  | 7  | 11 | 6 | 8 | 9  | 6 | 8 |
| BRE04FUJS3.19 | BR4 | Malus x domestica | Fuji       | Brazil | 13 | 16 | 15 | 2 | 7  | 7  | 9  | 6 | 5 | 11 | 5 | 7 |
| BRE04FUJS3.20 | BR4 | Malus x domestica | Fuji       | Brazil | 5  | 14 | ?  | 3 | 9  | 7  | 10 | 6 | 5 | 8  | 6 | 8 |
| BRE04FUJS3.21 | BR4 | Malus x domestica | Fuji       | Brazil | 5  | 10 | 15 | 2 | 6  | 7  | 9  | 6 | 8 | 3  | ? | 7 |
| BRE04FUJS3.22 | BR4 | Malus x domestica | Fuji       | Brazil | 13 | 14 | 6  | 2 | 7  | 6  | 11 | 7 | 5 | 13 | 5 | 8 |
| BRE04FUJS3.23 | BR4 | Malus x domestica | Fuji       | Brazil | 12 | 9  | 15 | 2 | 7  | 7  | 10 | 5 | 5 | 3  | 5 | 8 |
| BRE04FUJS3.24 | BR4 | Malus x domestica | Fuji       | Brazil | 3  | 9  | 15 | 2 | ?  | 12 | 8  | 7 | 8 | 10 | 6 | 8 |
| BRE04FUJS3.25 | BR4 | Malus x domestica | Fuji       | Brazil | 12 | 9  | 15 | 3 | 7  | 7  | 9  | 6 | 5 | 13 | 6 | 8 |
| BRE04FUJS3.26 | BR4 | Malus x domestica | Fuji       | Brazil | 12 | 2  | 15 | 3 | 7  | 6  | 9  | 4 | 5 | 3  | 6 | 8 |
| BRE04FUJS3.27 | BR4 | Malus x domestica | Fuji       | Brazil | 12 | 14 | 6  | 2 | 6  | 7  | ?  | 5 | 5 | 9  | 6 | 8 |
| BRE04FUjS3.7  | BR4 | Malus x domestica | Fuji       | Brazil | 13 | 14 | 17 | 2 | 9  | 7  | 10 | ? | 5 | 8  | 6 | 8 |
| BRE04FUJS3.9  | BR4 | Malus x domestica | Fuji       | Brazil | 12 | 2  | 14 | 2 | 7  | 9  | 9  | 7 | 5 | 10 | 6 | 8 |
| BR04GAV4.10   | BR5 | Malus x domestica | Royal Gala | Brazil | 12 | 2  | 15 | 2 | 8  | 9  | 9  | 7 | 5 | 13 | 4 | 8 |
| BR04GAV4.11   | BR5 | Malus x domestica | Royal Gala | Brazil | 12 | 2  | 15 | 2 | 8  | 9  | ?  | 7 | 5 | 13 | 4 | 8 |
| BR04GAV4.12   | BR5 | Malus x domestica | Royal Gala | Brazil | 12 | 10 | 18 | 3 | 6  | 9  | 9  | 6 | 5 | 3  | 6 | 8 |
| BR04GAV4.13   | BR5 | Malus x domestica | Royal Gala | Brazil | 12 | 9  | 16 | 3 | 6  | 9  | 10 | 6 | 8 | 3  | 6 | 8 |
| BR04GAV4.14   | BR5 | Malus x domestica | Royal Gala | Brazil | 12 | 9  | 17 | 2 | 8  | 9  | 10 | 5 | 8 | 8  | 5 | 8 |
| BR04GAV4.15   | BR5 | Malus x domestica | Royal Gala | Brazil | 11 | ?  | 16 | 2 | 7  | 7  | 6  | 6 | 5 | 10 | 6 | 8 |
| BR04GAV4.16   | BR5 | Malus x domestica | Royal Gala | Brazil | 12 | 9  | 16 | 3 | 6  | 9  | 9  | 6 | 8 | 3  | 6 | 8 |
| BR04GAV4.17   | BR5 | Malus x domestica | Royal Gala | Brazil | 12 | 9  | 15 | 3 | 8  | 7  | ?  | 5 | 5 | 8  | 6 | 8 |
| BR04GAV4.18   | BR5 | Malus x domestica | Royal Gala | Brazil | 12 | 9  | 15 | 3 | 8  | 7  | ?  | 5 | 5 | 8  | 6 | 8 |
| BR04GAV4.19   | BR5 | Malus x domestica | Royal Gala | Brazil | 12 | 9  | 15 | 3 | 8  | 7  | 10 | 5 | 5 | 8  | 6 | 8 |

|             |     |                   |            |        |    |    |    |   |    |    |    |   |    |    |   |    |
|-------------|-----|-------------------|------------|--------|----|----|----|---|----|----|----|---|----|----|---|----|
| BR04GAV4.20 | BR5 | Malus x domestica | Royal Gala | Brazil | 12 | 9  | 16 | 3 | 6  | 9  | 10 | 6 | 8  | 3  | 6 | 8  |
| BR04GAV4.21 | BR5 | Malus x domestica | Royal Gala | Brazil | 12 | 9  | 15 | 3 | 8  | 7  | 10 | 5 | 5  | 8  | 6 | 8  |
| BR04GAV4.22 | BR5 | Malus x domestica | Royal Gala | Brazil | 12 | 2  | 15 | 3 | 6  | 7  | 10 | 6 | 8  | 11 | 6 | 8  |
| BR04GAV4.23 | BR5 | Malus x domestica | Royal Gala | Brazil | 12 | 9  | 15 | 3 | 8  | 7  | 10 | 5 | 5  | 8  | 6 | 8  |
| BR04GAV4.24 | BR5 | Malus x domestica | Royal Gala | Brazil | 12 | 9  | 15 | 3 | 8  | 7  | 10 | 5 | 5  | 8  | 6 | 8  |
| BR04GAV4.25 | BR5 | Malus x domestica | Royal Gala | Brazil | 12 | 2  | 15 | 2 | 8  | 9  | 10 | 7 | 5  | 13 | 6 | 8  |
| BR04GAV4.26 | BR5 | Malus x domestica | Royal Gala | Brazil | 13 | 10 | 18 | 2 | 6  | 7  | 9  | 4 | 8  | 13 | 6 | 8  |
| BR04GAV4.27 | BR5 | Malus x domestica | Royal Gala | Brazil | 12 | 2  | 15 | 3 | 6  | 7  | 10 | 6 | 8  | 11 | 6 | 8  |
| BR04GAV4.28 | BR5 | Malus x domestica | Royal Gala | Brazil | 13 | 9  | 18 | 2 | 6  | 7  | 9  | 4 | 8  | 13 | 6 | 8  |
| BR04GAV4.29 | BR5 | Malus x domestica | Royal Gala | Brazil | 13 | 10 | 18 | 2 | 6  | 7  | 9  | 4 | 8  | 13 | 6 | 8  |
| BR04GAV4.30 | BR5 | Malus x domestica | Royal Gala | Brazil | 12 | 9  | 16 | 3 | 6  | 9  | 9  | 6 | 8  | 3  | 6 | 8  |
| BR04GAV4.31 | BR5 | Malus x domestica | Royal Gala | Brazil | 12 | 2  | 15 | 2 | 8  | 9  | 9  | 7 | 5  | 13 | 4 | 8  |
| BR04GAV4.32 | BR5 | Malus x domestica | Royal Gala | Brazil | 12 | 2  | 15 | 3 | 6  | 7  | 9  | 6 | 8  | 11 | 6 | 8  |
| BR04GAV4.33 | BR5 | Malus x domestica | Royal Gala | Brazil | 12 | 2  | 15 | 3 | 6  | 7  | 9  | 6 | 8  | 11 | 6 | 8  |
| BR04GAV4.34 | BR5 | Malus x domestica | Royal Gala | Brazil | 12 | 2  | 15 | 3 | 6  | 7  | 9  | 6 | 8  | 11 | 6 | 8  |
| BR04GAV4.35 | BR5 | Malus x domestica | Royal Gala | Brazil | 12 | 2  | 15 | 3 | 6  | 7  | 9  | 6 | 8  | 11 | 6 | 8  |
| BR04GAV4.36 | BR5 | Malus x domestica | Royal Gala | Brazil | 13 | 10 | 18 | 2 | 6  | 7  | 9  | 4 | 8  | 13 | 6 | 8  |
| BR04GAV4.37 | BR5 | Malus x domestica | Royal Gala | Brazil | 11 | 9  | 17 | 2 | 7  | 6  | ?  | 8 | 5  | 16 | 5 | 8  |
| BR04GAV4.38 | BR5 | Malus x domestica | Royal Gala | Brazil | 12 | 2  | 15 | 3 | 6  | 7  | 10 | 6 | 8  | 11 | 6 | 8  |
| BR04GAV4.7  | BR5 | Malus x domestica | Royal Gala | Brazil | 12 | 9  | 15 | 2 | 9  | 6  | 12 | 5 | 5  | 10 | 4 | 8  |
| BR04GAV4.8  | BR5 | Malus x domestica | Royal Gala | Brazil | 12 | 2  | 15 | 2 | 18 | 7  | ?  | 7 | 5  | 13 | 6 | 8  |
| BR04GAV4.9  | BR5 | Malus x domestica | Royal Gala | Brazil | 3  | 9  | 15 | 3 | 7  | 6  | 10 | 5 | 5  | 10 | 6 | 8  |
| BR04GAV5.1  | BR5 | Malus x domestica | Royal Gala | Brazil | 12 | 10 | ?  | 3 | 9  | 9  | 9  | 5 | 5  | 13 | 6 | 8  |
| BR04GAV5.10 | BR5 | Malus x domestica | Royal Gala | Brazil | 12 | 8  | 19 | 3 | 7  | 7  | 14 | 5 | 5  | 13 | 6 | 8  |
| BR04GAV5.11 | BR5 | Malus x domestica | Royal Gala | Brazil | 3  | 6  | 17 | 2 | ?  | 9  | 9  | 8 | 8  | 11 | 6 | 12 |
| BR04GAV5.12 | BR5 | Malus x domestica | Royal Gala | Brazil | 12 | 8  | ?  | 2 | 6  | 7  | 9  | 6 | 5  | 3  | 5 | 12 |
| BR04GAV5.13 | BR5 | Malus x domestica | Royal Gala | Brazil | 14 | 8  | 15 | 2 | 14 | 7  | 9  | 6 | 8  | 3  | 4 | 8  |
| BR04GAV5.14 | BR5 | Malus x domestica | Royal Gala | Brazil | 12 | 9  | 16 | 2 | 7  | 7  | 9  | 8 | 8  | 3  | 6 | 8  |
| BR04GAV5.15 | BR5 | Malus x domestica | Royal Gala | Brazil | 12 | 9  | 17 | 2 | 7  | 7  | ?  | 4 | 14 | 3  | 6 | 12 |
| BR04GAV5.16 | BR5 | Malus x domestica | Royal Gala | Brazil | 12 | 9  | 17 | 2 | 8  | 12 | 11 | 8 | 5  | 14 | 6 | 8  |
| BR04GAV5.17 | BR5 | Malus x domestica | Royal Gala | Brazil | 12 | 9  | 15 | 3 | 6  | 6  | 11 | 6 | 8  | 14 | 6 | 8  |
| BR04GAV5.18 | BR5 | Malus x domestica | Royal Gala | Brazil | 11 | 2  | 20 | 3 | 9  | 9  | 11 | 5 | 8  | 13 | 6 | 8  |
| BR04GAV5.19 | BR5 | Malus x domestica | Royal Gala | Brazil | 12 | 9  | 17 | 2 | 6  | 7  | 11 | 7 | 8  | 3  | 6 | 8  |
| BR04GAV5.2  | BR5 | Malus x domestica | Royal Gala | Brazil | 11 | 9  | 4  | 2 | 7  | 9  | 9  | 7 | 5  | 10 | 6 | 8  |
| BR04GAV5.20 | BR5 | Malus x domestica | Royal Gala | Brazil | 3  | 10 | 15 | 2 | 6  | 12 | 10 | 6 | 5  | 13 | 5 | 8  |
| BR04GAV5.22 | BR5 | Malus x domestica | Royal Gala | Brazil | 12 | 8  | ?  | 2 | 7  | 9  | ?  | 7 | 5  | 13 | 7 | 8  |
| BR04GAV5.23 | BR5 | Malus x domestica | Royal Gala | Brazil | 12 | 10 | 15 | 3 | 7  | 7  | 11 | 6 | 5  | 8  | 6 | 8  |
| BR04GAV5.24 | BR5 | Malus x domestica | Royal Gala | Brazil | 12 | 9  | 3  | 3 | 6  | 7  | ?  | 8 | 8  | 3  | 6 | 8  |
| BR04GAV5.25 | BR5 | Malus x domestica | Royal Gala | Brazil | 3  | 9  | 17 | 3 | 6  | 7  | 9  | 7 | 5  | 9  | 5 | 8  |
| BR04GAV5.26 | BR5 | Malus x domestica | Royal Gala | Brazil | 3  | 2  | 16 | 2 | 7  | 9  | 9  | 7 | 5  | 13 | 6 | 8  |
| BR04GAV5.27 | BR5 | Malus x domestica | Royal Gala | Brazil | 14 | 9  | 4  | 2 | 6  | 9  | 11 | 8 | 8  | 13 | 7 | 2  |

|               |     |                   |                 |        |    |    |    |   |    |    |    |   |    |    |   |   |
|---------------|-----|-------------------|-----------------|--------|----|----|----|---|----|----|----|---|----|----|---|---|
| BR04GAV5.3    | BR5 | Malus x domestica | Royal Gala      | Brazil | 12 | 2  | 16 | 2 | 6  | 7  | 9  | 4 | 5  | 10 | 5 | 8 |
| BR04GAV5.4    | BR5 | Malus x domestica | Royal Gala      | Brazil | 13 | 10 | ?  | 2 | 6  | 7  | 9  | 5 | 5  | 3  | 5 | 8 |
| BR04GAV5.5    | BR5 | Malus x domestica | Royal Gala      | Brazil | ?  | 10 | 15 | 2 | 6  | 5  | ?  | 6 | 5  | 5  | 4 | 8 |
| BR04GAV5.6    | BR5 | Malus x domestica | Royal Gala      | Brazil | 12 | 9  | 24 | 2 | 6  | 7  | 9  | 7 | 11 | 13 | 5 | 8 |
| BR04GAV5.7    | BR5 | Malus x domestica | Royal Gala      | Brazil | ?  | 9  | 15 | ? | 8  | 7  | 10 | 6 | 2  | ?  | 4 | 8 |
| BR04GAV5.8    | BR5 | Malus x domestica | Royal Gala      | Brazil | 12 | 9  | 17 | 2 | 11 | 9  | 10 | 7 | ?  | 13 | 4 | 8 |
| BR04GAV5.9    | BR5 | Malus x domestica | Royal Gala      | Brazil | 12 | 10 | 15 | 3 | 6  | 9  | 9  | 7 | 5  | 8  | 6 | 7 |
| BR04GFV6.1    | BR6 | Malus x domestica | Royal Gala/Fuji | Brazil | 12 | 9  | 16 | 2 | ?  | 7  | 9  | 5 | 5  | 3  | 6 | 8 |
| BR04GFV6.10   | BR6 | Malus x domestica | Royal Gala/Fuji | Brazil | 12 | 9  | 17 | 2 | 9  | 6  | 13 | 7 | 5  | 13 | 5 | 8 |
| BR04GFV6.11   | BR6 | Malus x domestica | Royal Gala/Fuji | Brazil | 11 | 10 | 16 | 2 | 7  | 7  | 9  | 7 | 5  | 13 | 5 | 8 |
| BR04GFV6.12   | BR6 | Malus x domestica | Royal Gala/Fuji | Brazil | 12 | 9  | 17 | 2 | 13 | 7  | ?  | 7 | 5  | 13 | 6 | 8 |
| BR04GFV6.13   | BR6 | Malus x domestica | Royal Gala/Fuji | Brazil | 13 | 10 | 16 | 2 | 6  | 7  | 14 | 5 | 8  | 10 | 6 | 8 |
| BR04GFV6.14   | BR6 | Malus x domestica | Royal Gala/Fuji | Brazil | 12 | 9  | ?  | ? | 6  | 9  | 11 | 7 | 5  | 12 | 5 | 8 |
| BR04GFV6.15   | BR6 | Malus x domestica | Royal Gala/Fuji | Brazil | ?  | 10 | 17 | ? | 6  | 7  | 10 | 5 | 5  | 10 | 5 | 8 |
| BR04GFV6.16   | BR6 | Malus x domestica | Royal Gala/Fuji | Brazil | 11 | 2  | ?  | ? | 13 | 9  | 14 | 5 | 8  | 10 | 6 | 8 |
| BR04GFV6.17   | BR6 | Malus x domestica | Royal Gala/Fuji | Brazil | 11 | 2  | 15 | ? | 7  | 7  | ?  | ? | 8  | 10 | 6 | 8 |
| BR04GFV6.18   | BR6 | Malus x domestica | Royal Gala/Fuji | Brazil | 11 | 2  | ?  | 2 | 13 | 5  | 14 | 8 | 8  | 10 | 5 | 8 |
| BR04GFV6.19   | BR6 | Malus x domestica | Royal Gala/Fuji | Brazil | 12 | 9  | 15 | ? | 8  | 5  | ?  | 6 | 2  | 10 | 4 | ? |
| BR04GFV6.2    | BR6 | Malus x domestica | Royal Gala/Fuji | Brazil | 12 | ?  | 16 | ? | 13 | 12 | 11 | 4 | 5  | 9  | 5 | 8 |
| BR04GFV6.20   | BR6 | Malus x domestica | Royal Gala/Fuji | Brazil | 12 | 10 | 16 | 2 | 7  | 7  | 11 | 6 | 5  | 9  | 5 | 8 |
| BR04GFV6.21   | BR6 | Malus x domestica | Royal Gala/Fuji | Brazil | 12 | 10 | 17 | 2 | 6  | 7  | 11 | 5 | 5  | 12 | 5 | 8 |
| BR04GFV6.22   | BR6 | Malus x domestica | Royal Gala/Fuji | Brazil | 12 | 2  | 17 | 2 | 7  | 7  | 10 | 6 | 5  | 10 | 5 | 8 |
| BR04GFV6.23   | BR6 | Malus x domestica | Royal Gala/Fuji | Brazil | 11 | 10 | 18 | 2 | 9  | 7  | ?  | 7 | 5  | 8  | 6 | 8 |
| BR04GFV6.4    | BR6 | Malus x domestica | Royal Gala/Fuji | Brazil | 13 | 2  | 17 | 2 | 6  | 5  | 10 | 6 | 5  | 10 | 4 | 8 |
| BR04GFV6.5    | BR6 | Malus x domestica | Royal Gala/Fuji | Brazil | 12 | 9  | 18 | 3 | 6  | 7  | 14 | 7 | 5  | 13 | 5 | 8 |
| BR04GFV6.6    | BR6 | Malus x domestica | Royal Gala/Fuji | Brazil | 12 | 10 | 15 | 2 | 6  | 7  | 9  | 9 | 5  | 13 | 6 | 8 |
| BR04GFV6.7    | BR6 | Malus x domestica | Royal Gala/Fuji | Brazil | 12 | 11 | 21 | 2 | 9  | 9  | 10 | 6 | 5  | 13 | 6 | 8 |
| BR04GFV6.8    | BR6 | Malus x domestica | Royal Gala/Fuji | Brazil | 11 | 9  | 15 | 2 | 6  | 5  | ?  | 6 | 5  | 9  | 5 | 8 |
| BR04GFV6.9    | BR6 | Malus x domestica | Royal Gala/Fuji | Brazil | 13 | 10 | ?  | 3 | 6  | 7  | 10 | 5 | 5  | 3  | 5 | 8 |
| BRE04GALS8.10 | BR7 | Malus x domestica | Royal Gala      | Brazil | 12 | 10 | 15 | 2 | 6  | 7  | 10 | 7 | 5  | 13 | 5 | 8 |
| BRE04GALS8.11 | BR7 | Malus x domestica | Royal Gala      | Brazil | 3  | 10 | 15 | 2 | 6  | 7  | 12 | 8 | 5  | 13 | 5 | 8 |
| BRE04GALS8.12 | BR7 | Malus x domestica | Royal Gala      | Brazil | 12 | 14 | 15 | 2 | 7  | 7  | 9  | 6 | 8  | 3  | 6 | 8 |
| BRE04GALS8.13 | BR7 | Malus x domestica | Royal Gala      | Brazil | 12 | 10 | 15 | 2 | 6  | 6  | ?  | 9 | 8  | 8  | 6 | 8 |
| BRE04GALS8.14 | BR7 | Malus x domestica | Royal Gala      | Brazil | 12 | 9  | 15 | 2 | 6  | 9  | 9  | 6 | 8  | 13 | 6 | 8 |
| BRE04GALS8.15 | BR7 | Malus x domestica | Royal Gala      | Brazil | 12 | 9  | 17 | 2 | 6  | 6  | 9  | 8 | 5  | 14 | 6 | 8 |
| BRE04GALS8.16 | BR7 | Malus x domestica | Royal Gala      | Brazil | 12 | 9  | 15 | 2 | 6  | 7  | 9  | 6 | 5  | 12 | 5 | ? |
| BRE04GALS8.17 | BR7 | Malus x domestica | Royal Gala      | Brazil | 12 | 10 | 16 | 2 | ?  | 7  | 8  | 5 | 5  | 8  | 5 | 8 |
| BRE04GALS8.18 | BR7 | Malus x domestica | Royal Gala      | Brazil | 12 | 10 | 15 | 2 | 6  | 6  | 9  | 5 | 8  | 13 | 5 | 8 |
| BRE04GALS8.19 | BR7 | Malus x domestica | Royal Gala      | Brazil | 3  | 10 | 17 | 2 | 13 | 7  | 7  | 5 | 5  | 12 | 5 | 8 |
| BRE04GAIS8.2  | BR7 | Malus x domestica | Royal Gala      | Brazil | 3  | 14 | 18 | 2 | 13 | 5  | 9  | 7 | 5  | 3  | 5 | 8 |
| BRE04GALS8.20 | BR7 | Malus x domestica | Royal Gala      | Brazil | 12 | 14 | 15 | 2 | ?  | 7  | 9  | 6 | 8  | 3  | 6 | 8 |

|               |     |                   |                  |              |    |    |    |   |    |    |    |    |    |    |   |   |
|---------------|-----|-------------------|------------------|--------------|----|----|----|---|----|----|----|----|----|----|---|---|
| BRE04GALS8.21 | BR7 | Malus x domestica | Royal Gala       | Brazil       | 12 | 10 | 6  | 2 | 6  | 7  | 9  | 6  | 5  | 13 | 5 | 8 |
| BRE04GALS8.22 | BR7 | Malus x domestica | Royal Gala       | Brazil       | 3  | 10 | 17 | 2 | 7  | 12 | 9  | 5  | 8  | 12 | 6 | 8 |
| BRE04GALS8.24 | BR7 | Malus x domestica | Royal Gala       | Brazil       | 3  | 10 | 15 | 3 | 6  | 7  | 9  | 8  | 5  | 12 | 5 | 8 |
| BRE04GALS8.25 | BR7 | Malus x domestica | Royal Gala       | Brazil       | 13 | 9  | 6  | 2 | 6  | 12 | 10 | 8  | 8  | 8  | 5 | 8 |
| BRE04GALS8.26 | BR7 | Malus x domestica | Royal Gala       | Brazil       | 3  | 10 | 15 | 3 | 6  | 7  | 9  | 5  | 5  | 13 | 5 | 8 |
| BRE04GAIS8.3  | BR7 | Malus x domestica | Royal Gala       | Brazil       | 3  | 14 | 15 | 2 | 6  | 9  | ?  | 5  | 8  | 10 | 6 | 8 |
| BRE04GAIS8.5  | BR7 | Malus x domestica | Royal Gala       | Brazil       | 12 | 9  | 16 | 2 | 6  | 7  | 8  | 7  | 8  | 8  | 5 | 8 |
| BRE04GAIS8.6  | BR7 | Malus x domestica | Royal Gala       | Brazil       | 11 | 10 | ?  | 2 | 6  | 7  | 10 | 5  | 5  | 13 | 6 | 7 |
| BRE04GAIS8.7  | BR7 | Malus x domestica | Royal Gala       | Brazil       | 12 | 2  | 16 | 2 | 6  | 7  | 10 | 8  | 5  | 8  | 5 | 8 |
| BRE04GAIS8.8  | BR7 | Malus x domestica | Royal Gala       | Brazil       | 3  | 9  | 17 | 2 | 13 | 7  | ?  | ?  | 5  | 12 | 5 | 8 |
| BRE04GALS8.9  | BR7 | Malus x domestica | Royal Gala       | Brazil       | 12 | 10 | 16 | 2 | 6  | 7  | 7  | 5  | 5  | 8  | 5 | 8 |
| SA05Gold1     | SA  | Malus x domestica | Golden Delicious | South Africa | 13 | 9  | 8  | 5 | 5  | 7  | 12 | 8  | 18 | 6  | 4 | 8 |
| SA05Gold11b   | SA  | Malus x domestica | Golden Delicious | South Africa | 12 | 9  | ?  | 2 | ?  | 7  | 10 | 7  | 5  | 9  | 6 | 9 |
| SA05Gold14b1  | SA  | Malus x domestica | Golden Delicious | South Africa | 13 | 9  | 11 | 3 | 13 | 7  | 2  | 8  | 5  | 10 | 4 | 8 |
| SA05Gold14b2  | SA  | Malus x domestica | Golden Delicious | South Africa | 13 | 9  | 11 | 2 | 7  | 7  | 7  | 8  | 5  | 10 | 4 | 8 |
| SA05Gold16b   | SA  | Malus x domestica | Golden Delicious | South Africa | 12 | 2  | 8  | 2 | 15 | 7  | ?  | 8  | 5  | 10 | 4 | 8 |
| SA05Gold3b    | SA  | Malus x domestica | Golden Delicious | South Africa | 12 | 9  | 11 | 2 | 7  | 7  | 7  | 7  | 5  | 10 | 4 | 8 |
| SA05Gold5b    | SA  | Malus x domestica | Golden Delicious | South Africa | 13 | 9  | 11 | 3 | 13 | 7  | 10 | 6  | 5  | 6  | 4 | 8 |
| SA05Gold6b1   | SA  | Malus x domestica | Golden Delicious | South Africa | 13 | 10 | 8  | 3 | 7  | 7  | ?  | 8  | 5  | 10 | 4 | 8 |
| SA05Gold7b1   | SA  | Malus x domestica | Golden Delicious | South Africa | 3  | 9  | 12 | 3 | 13 | 7  | 15 | 8  | 5  | 16 | 4 | 8 |
| SA05Gold7b2   | SA  | Malus x domestica | Golden Delicious | South Africa | 13 | 9  | 8  | 2 | ?  | 7  | ?  | 6  | 5  | 9  | 4 | 8 |
| SA05Gold2     | SA  | Malus x domestica | Golden Delicious | South Africa | 3  | 10 | 7  | 3 | 13 | ?  | 7  | ?  | ?  | 10 | 4 | ? |
| SA05Gold8     | SA  | Malus x domestica | Golden Delicious | South Africa | 14 | 10 | 17 | 3 | 7  | 5  | 8  | ?  | 13 | 16 | 5 | 2 |
| NZ05GALF11    | NZ1 | Malus x domestica | Royal Gala       | New Zealand  | 3  | 19 | 11 | 2 | 7  | 7  | 10 | 5  | 11 | 9  | 6 | 8 |
| NZ05GALF12    | NZ1 | Malus x domestica | Royal Gala       | New Zealand  | 3  | 9  | 4  | 3 | 7  | 7  | 9  | 5  | 11 | 8  | 6 | 7 |
| NZ05GALF13    | NZ1 | Malus x domestica | Royal Gala       | New Zealand  | 12 | 9  | 11 | 2 | 4  | 7  | 7  | 10 | 8  | 8  | 7 | 8 |
| NZ05GALF14    | NZ1 | Malus x domestica | Royal Gala       | New Zealand  | 3  | 9  | 11 | 2 | 6  | 7  | 10 | 6  | 2  | 9  | 6 | 8 |
| NZ05GALF15    | NZ1 | Malus x domestica | Royal Gala       | New Zealand  | 12 | 9  | 6  | 2 | 6  | 7  | 7  | 6  | 2  | 8  | 6 | 8 |
| NZ05GALF16    | NZ1 | Malus x domestica | Royal Gala       | New Zealand  | 12 | 9  | 6  | 2 | 7  | 6  | 8  | 6  | 8  | 9  | 6 | 8 |
| NZ05GALF17    | NZ1 | Malus x domestica | Royal Gala       | New Zealand  | 12 | 10 | 6  | 3 | 4  | 7  | 8  | 5  | 8  | 11 | 7 | 8 |
| NZ05GALF18    | NZ1 | Malus x domestica | Royal Gala       | New Zealand  | 12 | 19 | 6  | 2 | 6  | 7  | 8  | 6  | 8  | 8  | 6 | 8 |
| NZ05GALF19    | NZ1 | Malus x domestica | Royal Gala       | New Zealand  | 12 | 9  | 14 | 2 | 6  | 7  | 10 | 5  | 8  | 8  | 6 | 8 |
| NZ05GALF20    | NZ1 | Malus x domestica | Royal Gala       | New Zealand  | 11 | 9  | 15 | 2 | ?  | 7  | 11 | 5  | 8  | 9  | 6 | 8 |
| NZ05GALF21    | NZ1 | Malus x domestica | Royal Gala       | New Zealand  | 12 | 9  | 4  | 2 | 4  | 7  | 9  | 5  | 5  | 9  | 6 | 7 |
| NZ05GALF22    | NZ1 | Malus x domestica | Royal Gala       | New Zealand  | 12 | 19 | 6  | 2 | 6  | 7  | 8  | 6  | 8  | 8  | 6 | 8 |
| NZ05GALF23    | NZ1 | Malus x domestica | Royal Gala       | New Zealand  | 12 | 19 | ?  | 2 | ?  | 7  | 10 | 5  | 8  | 9  | 6 | 8 |
| NZ05GALF24    | NZ1 | Malus x domestica | Royal Gala       | New Zealand  | 12 | 19 | ?  | 2 | 6  | 7  | 8  | 6  | 8  | 8  | 6 | 8 |
| NZ05GALF25    | NZ1 | Malus x domestica | Royal Gala       | New Zealand  | 3  | 9  | ?  | 2 | 6  | 6  | 10 | 5  | 2  | 9  | 6 | 8 |
| NZ05GALF26    | NZ1 | Malus x domestica | Royal Gala       | New Zealand  | 3  | 9  | 6  | 2 | 6  | 6  | 10 | 5  | 2  | 9  | 6 | 8 |
| NZ05GALF27    | NZ1 | Malus x domestica | Royal Gala       | New Zealand  | 12 | 9  | ?  | 2 | 6  | 6  | 8  | 5  | 8  | 9  | 6 | 8 |
| NZ05GALF28    | NZ1 | Malus x domestica | Royal Gala       | New Zealand  | 12 | 9  | ?  | 2 | 4  | 7  | 7  | 5  | 8  | 8  | 6 | 8 |

|            |     |                   |            |             |    |    |    |   |    |   |    |   |   |    |   |   |
|------------|-----|-------------------|------------|-------------|----|----|----|---|----|---|----|---|---|----|---|---|
| NZ05GALF29 | NZ1 | Malus x domestica | Royal Gala | New Zealand | 3  | 19 | 3  | 3 | ?  | 7 | 11 | 9 | 8 | 9  | 6 | 8 |
| NZ05GALF30 | NZ1 | Malus x domestica | Royal Gala | New Zealand | 12 | 10 | 12 | 3 | ?  | 7 | 8  | 5 | 8 | 11 | 7 | 8 |
| NZ05GALF31 | NZ1 | Malus x domestica | Royal Gala | New Zealand | 12 | 19 | ?  | 2 | 4  | 7 | 7  | 5 | 8 | 8  | 7 | 8 |
| NZ05GALF32 | NZ1 | Malus x domestica | Royal Gala | New Zealand | 12 | 9  | 6  | 2 | 6  | 7 | 7  | 5 | 8 | 8  | 6 | 8 |
| NZ05GALF33 | NZ1 | Malus x domestica | Royal Gala | New Zealand | 12 | 9  | ?  | 2 | 4  | 7 | 10 | 5 | 8 | 8  | 7 | 7 |
| NZ05GALF34 | NZ1 | Malus x domestica | Royal Gala | New Zealand | 12 | 10 | 6  | 2 | 6  | 7 | 7  | 6 | 8 | 9  | 7 | 8 |
| NZ05GALF35 | NZ1 | Malus x domestica | Royal Gala | New Zealand | 12 | 9  | 15 | 2 | 7  | 7 | 10 | 6 | 2 | 8  | 6 | 8 |
| NZ05GALF36 | NZ1 | Malus x domestica | Royal Gala | New Zealand | 12 | 9  | 17 | 2 | 6  | 7 | 8  | 6 | 8 | 8  | 6 | 8 |
| NZ05GALF37 | NZ1 | Malus x domestica | Royal Gala | New Zealand | 13 | 19 | 11 | 2 | 6  | 7 | 7  | 5 | 8 | 8  | 6 | 8 |
| NZ06FU1    | NZ2 | Malus x domestica | Fuji       | New Zealand | 12 | 19 | 4  | 3 | 6  | 7 | ?  | 6 | 8 | 5  | 6 | 7 |
| NZ06FU10   | NZ2 | Malus x domestica | Fuji       | New Zealand | 12 | 10 | 10 | 2 | 16 | 7 | 7  | 5 | 5 | 12 | 6 | 8 |
| NZ06FU11   | NZ2 | Malus x domestica | Fuji       | New Zealand | 12 | 10 | 11 | 2 | 7  | 7 | ?  | 5 | 5 | 12 | 6 | 8 |
| NZ06FU12   | NZ2 | Malus x domestica | Fuji       | New Zealand | 12 | 9  | 5  | 2 | 6  | 7 | 7  | 5 | 8 | 12 | 6 | 8 |
| NZ06FU13   | NZ2 | Malus x domestica | Fuji       | New Zealand | 12 | 9  | 4  | 2 | 8  | 7 | 9  | 5 | 8 | 8  | 6 | 7 |
| NZ06FU14   | NZ2 | Malus x domestica | Fuji       | New Zealand | 12 | 10 | 3  | 2 | 7  | 7 | 10 | 5 | 8 | 11 | 6 | 8 |
| NZ06FU15   | NZ2 | Malus x domestica | Fuji       | New Zealand | 12 | 19 | 17 | 2 | 7  | 7 | 19 | 5 | 8 | 12 | 4 | 7 |
| NZ06FU16   | NZ2 | Malus x domestica | Fuji       | New Zealand | 12 | 9  | ?  | 2 | 7  | 7 | 8  | 5 | 8 | 5  | 6 | 8 |
| NZ06FU17   | NZ2 | Malus x domestica | Fuji       | New Zealand | 12 | ?  | 17 | 2 | 7  | 7 | 7  | 6 | 8 | 11 | 4 | 7 |
| NZ06FU18   | NZ2 | Malus x domestica | Fuji       | New Zealand | 3  | 9  | 11 | 2 | 20 | 7 | 10 | 5 | 8 | 8  | 6 | 7 |
| NZ06FU2    | NZ2 | Malus x domestica | Fuji       | New Zealand | 12 | 10 | 11 | 2 | 6  | 7 | 10 | 7 | 5 | 8  | 4 | 8 |
| NZ06FU20   | NZ2 | Malus x domestica | Fuji       | New Zealand | 12 | 10 | 21 | 2 | 16 | 7 | 9  | 7 | 5 | 12 | 6 | 8 |
| NZ06FU21   | NZ2 | Malus x domestica | Fuji       | New Zealand | 12 | 10 | 11 | 2 | 6  | 7 | 8  | 4 | 5 | 8  | 4 | 7 |
| NZ06FU22   | NZ2 | Malus x domestica | Fuji       | New Zealand | 12 | 19 | 12 | 2 | 6  | 7 | 10 | 5 | 8 | 12 | 6 | 8 |
| NZ06FU23   | NZ2 | Malus x domestica | Fuji       | New Zealand | 12 | 9  | 17 | 2 | 19 | 7 | 7  | 5 | 8 | 11 | 6 | 8 |
| NZ06FU24   | NZ2 | Malus x domestica | Fuji       | New Zealand | 3  | 10 | 17 | 2 | 6  | 7 | 8  | 5 | 5 | 8  | 5 | 8 |
| NZ06FU25   | NZ2 | Malus x domestica | Fuji       | New Zealand | 13 | ?  | 13 | 2 | 7  | 7 | 8  | 6 | 8 | 4  | 4 | 7 |
| NZ06FU26   | NZ2 | Malus x domestica | Fuji       | New Zealand | 12 | 9  | 5  | 2 | 6  | 7 | 8  | 6 | 5 | 4  | 4 | 8 |
| NZ06FU27   | NZ2 | Malus x domestica | Fuji       | New Zealand | 12 | 9  | 11 | 2 | 20 | 7 | 10 | 6 | 8 | 8  | 6 | 8 |
| NZ06FU28   | NZ2 | Malus x domestica | Fuji       | New Zealand | 3  | 9  | 17 | 2 | 6  | 7 | ?  | 7 | 5 | 4  | 4 | 8 |
| NZ06FU29   | NZ2 | Malus x domestica | Fuji       | New Zealand | 12 | 10 | ?  | 2 | 6  | 7 | 9  | 7 | 8 | 3  | 6 | 7 |
| NZ06FU3    | NZ2 | Malus x domestica | Fuji       | New Zealand | 12 | 9  | 3  | 2 | 6  | 7 | 8  | 5 | 8 | 13 | 6 | 7 |
| NZ06FU30   | NZ2 | Malus x domestica | Fuji       | New Zealand | 12 | 9  | ?  | 2 | 6  | 7 | 8  | 6 | 8 | 12 | 6 | 8 |
| NZ06FU31   | NZ2 | Malus x domestica | Fuji       | New Zealand | 12 | 9  | 11 | 2 | 8  | 7 | 10 | 5 | 5 | 9  | 6 | 7 |
| NZ06FU32   | NZ2 | Malus x domestica | Fuji       | New Zealand | 13 | 9  | 23 | 2 | ?  | 7 | ?  | 8 | 8 | 12 | 4 | 7 |
| NZ06FU33   | NZ2 | Malus x domestica | Fuji       | New Zealand | 3  | 19 | 4  | 2 | 6  | 7 | 8  | 7 | 5 | 11 | 6 | 7 |
| NZ06FU34   | NZ2 | Malus x domestica | Fuji       | New Zealand | 12 | 10 | 11 | 2 | 7  | 7 | 10 | 4 | ? | 4  | 4 | 8 |
| NZ06FU35   | NZ2 | Malus x domestica | Fuji       | New Zealand | 12 | ?  | 11 | 2 | 7  | 7 | 8  | 5 | 8 | 12 | 4 | 2 |
| NZ06FU36   | NZ2 | Malus x domestica | Fuji       | New Zealand | 12 | 10 | 11 | 2 | 6  | 7 | ?  | 5 | 8 | 4  | 6 | 8 |
| NZ06FU37   | NZ2 | Malus x domestica | Fuji       | New Zealand | 13 | 9  | 11 | 2 | 6  | 7 | 10 | 8 | 5 | 17 | 6 | 8 |
| NZ06FU38   | NZ2 | Malus x domestica | Fuji       | New Zealand | 12 | 9  | 4  | 3 | 6  | 7 | 8  | 5 | 8 | 9  | 4 | 2 |
| NZ06FU39   | NZ2 | Malus x domestica | Fuji       | New Zealand | 12 | 9  | 11 | 2 | 7  | 7 | 8  | 6 | 5 | 8  | 6 | 8 |

|          |     |                   |      |             |    |    |    |   |   |   |    |   |   |    |   |   |
|----------|-----|-------------------|------|-------------|----|----|----|---|---|---|----|---|---|----|---|---|
| NZ06FU4  | NZ2 | Malus x domestica | Fuji | New Zealand | 12 | ?  | 11 | 2 | 7 | 7 | 11 | 5 | 5 | 5  | 6 | 2 |
| NZ06FU40 | NZ2 | Malus x domestica | Fuji | New Zealand | 12 | ?  | 17 | 3 | 6 | 6 | ?  | 8 | 2 | 8  | 6 | 2 |
| NZ06FU5  | NZ2 | Malus x domestica | Fuji | New Zealand | 12 | 10 | 17 | 2 | 7 | 7 | ?  | 6 | 5 | 9  | 4 | 7 |
| NZ06FU6  | NZ2 | Malus x domestica | Fuji | New Zealand | 12 | ?  | ?  | 2 | 8 | 7 | 10 | 6 | 5 | 8  | 4 | 7 |
| NZ06FU7  | NZ2 | Malus x domestica | Fuji | New Zealand | 12 | 19 | 11 | 2 | 6 | 7 | 7  | 5 | 5 | 9  | 6 | 7 |
| NZ06FU8  | NZ2 | Malus x domestica | Fuji | New Zealand | 12 | 9  | 11 | 2 | 6 | 7 | ?  | 8 | 8 | 12 | 6 | 7 |
| NZ06FU9  | NZ2 | Malus x domestica | Fuji | New Zealand | 3  | 9  | 11 | 2 | 7 | 9 | 8  | 8 | 5 | 8  | 6 | 8 |

---
