# Supplementary material for: On the Origin and Spread of the Scab Disease of Apple: Out of Central Asia
Source: PubMed Central journal article supplement (PMC2186383; doi:10.1371/journal.pone.0001455), 2008-01-16
Supplement: pone.0001455.s003.pdf [file pone.0001455.s003.pdf]

Table S3. Admixture analysis for 1180 haplotypes of *Venturia inaequalis* from seven regions: (A) average membership coefficients in seven clusters inferred with the individual-based method implemented in the Structure program [69, 70], and (B) average membership coefficients in six clusters inferred with the sample-based method implemented in Baps 4 [71].

A

| Clusters | Regional groups of samples |        |         |               |        |             |              |
|----------|----------------------------|--------|---------|---------------|--------|-------------|--------------|
|          | Central Asia               | Europe | Morocco | North America | Brazil | New Zealand | South Africa |
| I        | 0.046                      | 0.114  | 0.053   | 0.662         | 0.058  | 0.083       | 0.127        |
| II       | 0.340                      | 0.114  | 0.030   | 0.051         | 0.029  | 0.033       | 0.082        |
| III      | 0.051                      | 0.096  | 0.038   | 0.045         | 0.681  | 0.076       | 0.046        |
| IV       | 0.339                      | 0.120  | 0.038   | 0.052         | 0.035  | 0.032       | 0.252        |
| V        | 0.102                      | 0.341  | 0.051   | 0.059         | 0.066  | 0.069       | 0.347        |
| VI       | 0.090                      | 0.156  | 0.067   | 0.091         | 0.097  | 0.690       | 0.113        |
| VII      | 0.033                      | 0.058  | 0.722   | 0.041         | 0.036  | 0.018       | 0.032        |

B

| Clusters | Regional groups of samples |        |         |               |        |             |              |
|----------|----------------------------|--------|---------|---------------|--------|-------------|--------------|
|          | Central Asia               | Europe | Morocco | North America | Brazil | New Zealand | South Africa |
| I        | 0.041                      | 0.069  | 0.045   | 0.730         | 0.027  | 0.026       | 0.143        |
| II       | 0.703                      | 0.110  | 0.019   | 0.037         | 0.013  | 0.010       | 0.172        |
| III      | 0.062                      | 0.117  | 0.030   | 0.039         | 0.823  | 0.051       | 0.029        |
| IV       | 0.044                      | 0.079  | 0.827   | 0.044         | 0.036  | 0.018       | 0.024        |
| V        | 0.069                      | 0.108  | 0.042   | 0.098         | 0.065  | 0.851       | 0.083        |
| VI       | 0.081                      | 0.517  | 0.037   | 0.052         | 0.035  | 0.045       | 0.548        |
