# Supplementary material for: On the Origin and Spread of the Scab Disease of Apple: Out of Central Asia
Source: PubMed Central journal article supplement (PMC2186383; doi:10.1371/journal.pone.0001455), 2008-01-16
Supplement: pone.0001455.s005.pdf [file pone.0001455.s005.pdf]

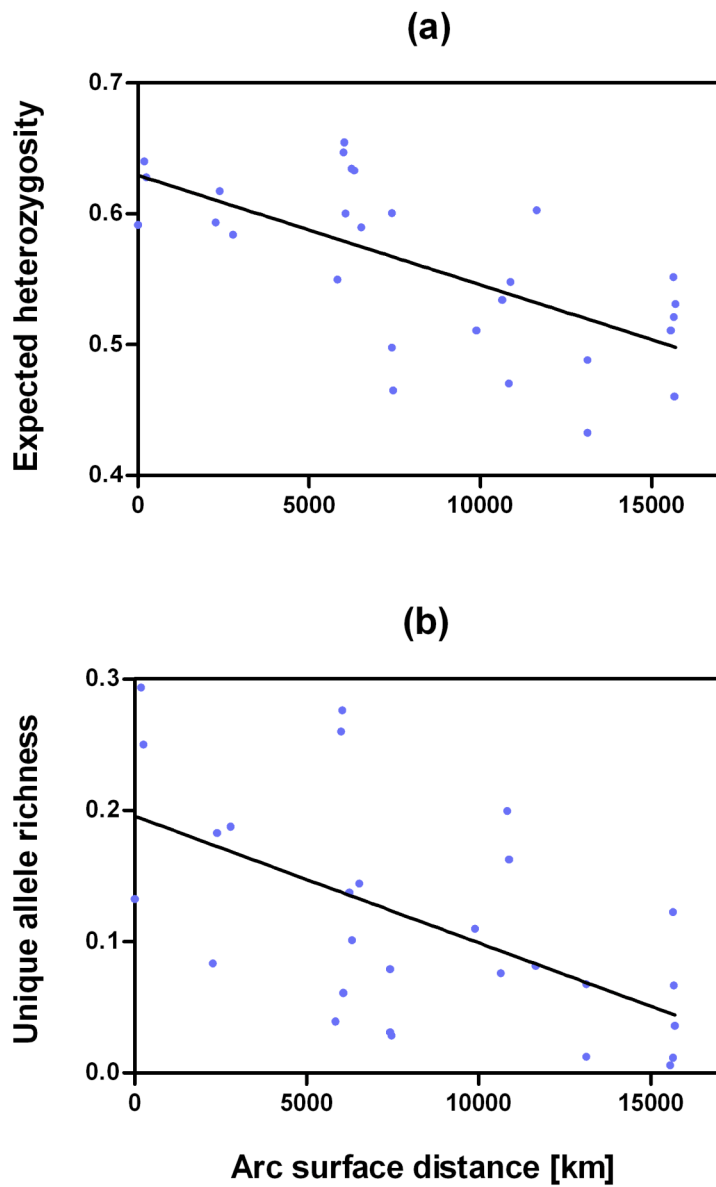

Figure S2. Scatterplot expected heterozygosity, unique allele richness and arc surface distance from the most eastern sample. A least-square regression line represents the relationship between the two variables. Significance of the correlation was tested using Spearman's  $r$  (expected heterozygosity:  $r=-0.66$ ,  $P<0.0001$ ; unique allele richness:  $r=-0.58$ ,  $P<0.0013$ ).
