# Supplementary material for: On the Origin and Spread of the Scab Disease of Apple: Out of Central Asia
Source: PubMed Central journal article supplement (PMC2186383; doi:10.1371/journal.pone.0001455), 2008-01-16
Supplement: pone.0001455.s006.pdf [file pone.0001455.s006.pdf]

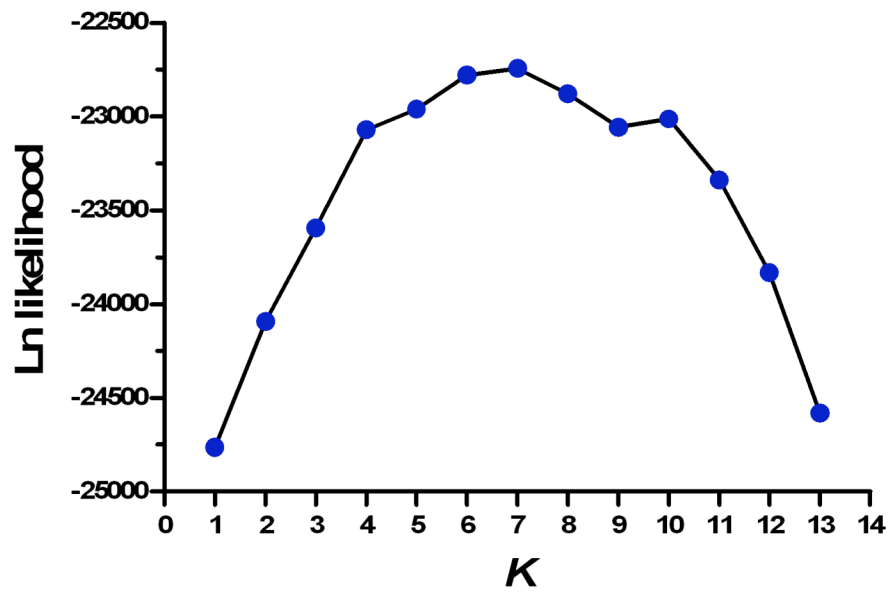

Figure S3: Plot of Ln likelihood of the data for several value of  $K$ , the parameter representing the number of populations in the Bayesian clustering algorithm implemented in the STRUCTURE program [69, 70]. Ln likelihood values were averaged across at least 6 independent runs of the program.
